# Supplementary material for: Genome-Wide Identification and Characterization of Small Peptides in Maize
Source: Front Plant Sci. 2021 Jun 16;12:695439. doi: 10.3389/fpls.2021.695439 (PMC8244733; doi:10.3389/fpls.2021.695439)
Supplement: Supplementary File 2 — Information of sORFs and sPeptides. [file Data_Sheet_2.xlsx]

## Sheet: supply
1	StringTie	transcript	198439	199039	1000	-	.	gene_id "MSTRG.8"; transcript_id "Zm00001d027239_T004"; gene_name "Zm00001d027239"; ref_gene_id "Zm00001d027239";
1	StringTie	exon	198439	198568	1000	-	.	gene_id "MSTRG.8"; transcript_id "Zm00001d027239_T004"; exon_number "1"; gene_name "Zm00001d027239"; ref_gene_id "Zm00001d027239";
1	StringTie	exon	198718	199039	1000	-	.	gene_id "MSTRG.8"; transcript_id "Zm00001d027239_T004"; exon_number "2"; gene_name "Zm00001d027239"; ref_gene_id "Zm00001d027239";
1	StringTie	transcript	198593	199039	1000	-	.	gene_id "MSTRG.8"; transcript_id "Zm00001d027239_T003"; gene_name "Zm00001d027239"; ref_gene_id "Zm00001d027239";
1	StringTie	exon	198593	198677	1000	-	.	gene_id "MSTRG.8"; transcript_id "Zm00001d027239_T003"; exon_number "1"; gene_name "Zm00001d027239"; ref_gene_id "Zm00001d027239";
1	StringTie	exon	198718	199039	1000	-	.	gene_id "MSTRG.8"; transcript_id "Zm00001d027239_T003"; exon_number "2"; gene_name "Zm00001d027239"; ref_gene_id "Zm00001d027239";
1	StringTie	transcript	198714	198798	1000	-	.	gene_id "MSTRG.8"; transcript_id "Zm00001d027239_T002"; gene_name "Zm00001d027239"; ref_gene_id "Zm00001d027239";
1	StringTie	exon	198714	198798	1000	-	.	gene_id "MSTRG.8"; transcript_id "Zm00001d027239_T002"; exon_number "1"; gene_name "Zm00001d027239"; ref_gene_id "Zm00001d027239";
1	StringTie	transcript	689101	689704	1000	+	.	gene_id "MSTRG.22"; transcript_id "Zm00001d027258_T001"; gene_name "Zm00001d027258"; ref_gene_id "Zm00001d027258";
1	StringTie	exon	689101	689317	1000	+	.	gene_id "MSTRG.22"; transcript_id "Zm00001d027258_T001"; exon_number "1"; gene_name "Zm00001d027258"; ref_gene_id "Zm00001d027258";
1	StringTie	exon	689655	689704	1000	+	.	gene_id "MSTRG.22"; transcript_id "Zm00001d027258_T001"; exon_number "2"; gene_name "Zm00001d027258"; ref_gene_id "Zm00001d027258";
1	StringTie	transcript	689911	690114	1000	-	.	gene_id "MSTRG.23"; transcript_id "Zm00001d027259_T058"; gene_name "Zm00001d027259"; ref_gene_id "Zm00001d027259";
1	StringTie	exon	689911	690114	1000	-	.	gene_id "MSTRG.23"; transcript_id "Zm00001d027259_T058"; exon_number "1"; gene_name "Zm00001d027259"; ref_gene_id "Zm00001d027259";
1	StringTie	transcript	689911	715247	1000	-	.	gene_id "MSTRG.23"; transcript_id "Zm00001d027259_T019"; gene_name "Zm00001d027259"; ref_gene_id "Zm00001d027259";
1	StringTie	exon	689911	690114	1000	-	.	gene_id "MSTRG.23"; transcript_id "Zm00001d027259_T019"; exon_number "1"; gene_name "Zm00001d027259"; ref_gene_id "Zm00001d027259";
1	StringTie	exon	714789	714818	1000	-	.	gene_id "MSTRG.23"; transcript_id "Zm00001d027259_T019"; exon_number "2"; gene_name "Zm00001d027259"; ref_gene_id "Zm00001d027259";
1	StringTie	exon	714918	715247	1000	-	.	gene_id "MSTRG.23"; transcript_id "Zm00001d027259_T019"; exon_number "3"; gene_name "Zm00001d027259"; ref_gene_id "Zm00001d027259";
1	StringTie	transcript	693678	694168	1000	-	.	gene_id "MSTRG.23"; transcript_id "Zm00001d027259_T029"; gene_name "Zm00001d027259"; ref_gene_id "Zm00001d027259";
1	StringTie	exon	693678	693890	1000	-	.	gene_id "MSTRG.23"; transcript_id "Zm00001d027259_T029"; exon_number "1"; gene_name "Zm00001d027259"; ref_gene_id "Zm00001d027259";
1	StringTie	exon	694083	694168	1000	-	.	gene_id "MSTRG.23"; transcript_id "Zm00001d027259_T029"; exon_number "2"; gene_name "Zm00001d027259"; ref_gene_id "Zm00001d027259";
1	StringTie	transcript	697062	700531	1000	-	.	gene_id "MSTRG.23"; transcript_id "Zm00001d027259_T049"; gene_name "Zm00001d027259"; ref_gene_id "Zm00001d027259";
1	StringTie	exon	697062	697260	1000	-	.	gene_id "MSTRG.23"; transcript_id "Zm00001d027259_T049"; exon_number "1"; gene_name "Zm00001d027259"; ref_gene_id "Zm00001d027259";
1	StringTie	exon	700404	700531	1000	-	.	gene_id "MSTRG.23"; transcript_id "Zm00001d027259_T049"; exon_number "2"; gene_name "Zm00001d027259"; ref_gene_id "Zm00001d027259";
1	StringTie	transcript	1030648	1031090	1000	+	.	gene_id "MSTRG.27"; transcript_id "Zm00001d022650_T001"; gene_name "Zm00001d022650"; ref_gene_id "Zm00001d022650";
1	StringTie	exon	1030648	1031090	1000	+	.	gene_id "MSTRG.27"; transcript_id "Zm00001d022650_T001"; exon_number "1"; gene_name "Zm00001d022650"; ref_gene_id "Zm00001d022650";
1	StringTie	transcript	1496002	1496277	1000	+	.	gene_id "MSTRG.35"; transcript_id "Zm00001d027278_T060"; gene_name "Zm00001d027278"; ref_gene_id "Zm00001d027278";
1	StringTie	exon	1496002	1496098	1000	+	.	gene_id "MSTRG.35"; transcript_id "Zm00001d027278_T060"; exon_number "1"; gene_name "Zm00001d027278"; ref_gene_id "Zm00001d027278";
1	StringTie	exon	1496206	1496277	1000	+	.	gene_id "MSTRG.35"; transcript_id "Zm00001d027278_T060"; exon_number "2"; gene_name "Zm00001d027278"; ref_gene_id "Zm00001d027278";
1	StringTie	transcript	2109387	2109719	1000	-	.	gene_id "MSTRG.52"; transcript_id "Zm00001d027296_T001"; gene_name "Zm00001d027296"; ref_gene_id "Zm00001d027296";
1	StringTie	exon	2109387	2109719	1000	-	.	gene_id "MSTRG.52"; transcript_id "Zm00001d027296_T001"; exon_number "1"; gene_name "Zm00001d027296"; ref_gene_id "Zm00001d027296";
1	StringTie	transcript	2285257	2285972	1000	-	.	gene_id "MSTRG.56"; transcript_id "Zm00001d027302_T001"; gene_name "Zm00001d027302"; ref_gene_id "Zm00001d027302";
1	StringTie	exon	2285257	2285273	1000	-	.	gene_id "MSTRG.56"; transcript_id "Zm00001d027302_T001"; exon_number "1"; gene_name "Zm00001d027302"; ref_gene_id "Zm00001d027302";
1	StringTie	exon	2285475	2285560	1000	-	.	gene_id "MSTRG.56"; transcript_id "Zm00001d027302_T001"; exon_number "2"; gene_name "Zm00001d027302"; ref_gene_id "Zm00001d027302";
1	StringTie	exon	2285890	2285972	1000	-	.	gene_id "MSTRG.56"; transcript_id "Zm00001d027302_T001"; exon_number "3"; gene_name "Zm00001d027302"; ref_gene_id "Zm00001d027302";
1	StringTie	transcript	2285257	2286680	1000	-	.	gene_id "MSTRG.56"; transcript_id "Zm00001d027302_T006"; gene_name "Zm00001d027302"; ref_gene_id "Zm00001d027302";
1	StringTie	exon	2285257	2285273	1000	-	.	gene_id "MSTRG.56"; transcript_id "Zm00001d027302_T006"; exon_number "1"; gene_name "Zm00001d027302"; ref_gene_id "Zm00001d027302";
1	StringTie	exon	2285475	2285560	1000	-	.	gene_id "MSTRG.56"; transcript_id "Zm00001d027302_T006"; exon_number "2"; gene_name "Zm00001d027302"; ref_gene_id "Zm00001d027302";
1	StringTie	exon	2285890	2285972	1000	-	.	gene_id "MSTRG.56"; transcript_id "Zm00001d027302_T006"; exon_number "3"; gene_name "Zm00001d027302"; ref_gene_id "Zm00001d027302";
1	StringTie	exon	2286066	2286232	1000	-	.	gene_id "MSTRG.56"; transcript_id "Zm00001d027302_T006"; exon_number "4"; gene_name "Zm00001d027302"; ref_gene_id "Zm00001d027302";
1	StringTie	exon	2286525	2286680	1000	-	.	gene_id "MSTRG.56"; transcript_id "Zm00001d027302_T006"; exon_number "5"; gene_name "Zm00001d027302"; ref_gene_id "Zm00001d027302";
1	StringTie	transcript	2629741	2632726	1000	-	.	gene_id "MSTRG.63"; transcript_id "Zm00001d027309_T001"; gene_name "Zm00001d027309"; ref_gene_id "Zm00001d027309";
1	StringTie	exon	2629741	2629788	1000	-	.	gene_id "MSTRG.63"; transcript_id "Zm00001d027309_T001"; exon_number "1"; gene_name "Zm00001d027309"; ref_gene_id "Zm00001d027309";
1	StringTie	exon	2630283	2630366	1000	-	.	gene_id "MSTRG.63"; transcript_id "Zm00001d027309_T001"; exon_number "2"; gene_name "Zm00001d027309"; ref_gene_id "Zm00001d027309";
1	StringTie	exon	2632170	2632265	1000	-	.	gene_id "MSTRG.63"; transcript_id "Zm00001d027309_T001"; exon_number "3"; gene_name "Zm00001d027309"; ref_gene_id "Zm00001d027309";
1	StringTie	exon	2632377	2632433	1000	-	.	gene_id "MSTRG.63"; transcript_id "Zm00001d027309_T001"; exon_number "4"; gene_name "Zm00001d027309"; ref_gene_id "Zm00001d027309";
1	StringTie	exon	2632667	2632726	1000	-	.	gene_id "MSTRG.63"; transcript_id "Zm00001d027309_T001"; exon_number "5"; gene_name "Zm00001d027309"; ref_gene_id "Zm00001d027309";
1	StringTie	transcript	2634991	2635416	1000	-	.	gene_id "MSTRG.63"; transcript_id "Zm00001d027309_T010"; gene_name "Zm00001d027309"; ref_gene_id "Zm00001d027309";
1	StringTie	exon	2634991	2635158	1000	-	.	gene_id "MSTRG.63"; transcript_id "Zm00001d027309_T010"; exon_number "1"; gene_name "Zm00001d027309"; ref_gene_id "Zm00001d027309";
1	StringTie	exon	2635372	2635416	1000	-	.	gene_id "MSTRG.63"; transcript_id "Zm00001d027309_T010"; exon_number "2"; gene_name "Zm00001d027309"; ref_gene_id "Zm00001d027309";
1	StringTie	transcript	2780100	2780630	1000	+	.	gene_id "MSTRG.66"; transcript_id "Zm00001d027312_T010"; gene_name "Zm00001d027312"; ref_gene_id "Zm00001d027312";
1	StringTie	exon	2780100	2780630	1000	+	.	gene_id "MSTRG.66"; transcript_id "Zm00001d027312_T010"; exon_number "1"; gene_name "Zm00001d027312"; ref_gene_id "Zm00001d027312";
1	StringTie	transcript	2810192	2811119	1000	+	.	gene_id "MSTRG.68"; transcript_id "Zm00001d027314_T002"; gene_name "Zm00001d027314"; ref_gene_id "Zm00001d027314";
1	StringTie	exon	2810192	2810206	1000	+	.	gene_id "MSTRG.68"; transcript_id "Zm00001d027314_T002"; exon_number "1"; gene_name "Zm00001d027314"; ref_gene_id "Zm00001d027314";
1	StringTie	exon	2810300	2811119	1000	+	.	gene_id "MSTRG.68"; transcript_id "Zm00001d027314_T002"; exon_number "2"; gene_name "Zm00001d027314"; ref_gene_id "Zm00001d027314";
1	StringTie	transcript	2877673	2878262	1000	+	.	gene_id "MSTRG.73"; transcript_id "Zm00001d027319_T006"; gene_name "Zm00001d027319"; ref_gene_id "Zm00001d027319";
1	StringTie	exon	2877673	2877709	1000	+	.	gene_id "MSTRG.73"; transcript_id "Zm00001d027319_T006"; exon_number "1"; gene_name "Zm00001d027319"; ref_gene_id "Zm00001d027319";
1	StringTie	exon	2877793	2878262	1000	+	.	gene_id "MSTRG.73"; transcript_id "Zm00001d027319_T006"; exon_number "2"; gene_name "Zm00001d027319"; ref_gene_id "Zm00001d027319";
1	StringTie	transcript	3095308	3095604	1000	-	.	gene_id "MSTRG.84"; transcript_id "Zm00001d027332_T001"; gene_name "Zm00001d027332"; ref_gene_id "Zm00001d027332";
1	StringTie	exon	3095308	3095604	1000	-	.	gene_id "MSTRG.84"; transcript_id "Zm00001d027332_T001"; exon_number "1"; gene_name "Zm00001d027332"; ref_gene_id "Zm00001d027332";
1	StringTie	transcript	3108747	3109010	1000	+	.	gene_id "MSTRG.85"; transcript_id "Zm00001d027333_T035"; gene_name "Zm00001d027333"; ref_gene_id "Zm00001d027333";
1	StringTie	exon	3108747	3109010	1000	+	.	gene_id "MSTRG.85"; transcript_id "Zm00001d027333_T035"; exon_number "1"; gene_name "Zm00001d027333"; ref_gene_id "Zm00001d027333";
1	StringTie	transcript	3108747	3109605	1000	+	.	gene_id "MSTRG.85"; transcript_id "Zm00001d027333_T032"; gene_name "Zm00001d027333"; ref_gene_id "Zm00001d027333";
1	StringTie	exon	3108747	3108948	1000	+	.	gene_id "MSTRG.85"; transcript_id "Zm00001d027333_T032"; exon_number "1"; gene_name "Zm00001d027333"; ref_gene_id "Zm00001d027333";
1	StringTie	exon	3109597	3109605	1000	+	.	gene_id "MSTRG.85"; transcript_id "Zm00001d027333_T032"; exon_number "2"; gene_name "Zm00001d027333"; ref_gene_id "Zm00001d027333";
1	StringTie	transcript	3108747	3109663	1000	+	.	gene_id "MSTRG.85"; transcript_id "Zm00001d027333_T013"; gene_name "Zm00001d027333"; ref_gene_id "Zm00001d027333";
1	StringTie	exon	3108747	3108877	1000	+	.	gene_id "MSTRG.85"; transcript_id "Zm00001d027333_T013"; exon_number "1"; gene_name "Zm00001d027333"; ref_gene_id "Zm00001d027333";
1	StringTie	exon	3109597	3109663	1000	+	.	gene_id "MSTRG.85"; transcript_id "Zm00001d027333_T013"; exon_number "2"; gene_name "Zm00001d027333"; ref_gene_id "Zm00001d027333";
1	StringTie	transcript	3109606	3122314	1000	+	.	gene_id "MSTRG.85"; transcript_id "Zm00001d027333_T022"; gene_name "Zm00001d027333"; ref_gene_id "Zm00001d027333";
1	StringTie	exon	3109606	3109668	1000	+	.	gene_id "MSTRG.85"; transcript_id "Zm00001d027333_T022"; exon_number "1"; gene_name "Zm00001d027333"; ref_gene_id "Zm00001d027333";
1	StringTie	exon	3109746	3109838	1000	+	.	gene_id "MSTRG.85"; transcript_id "Zm00001d027333_T022"; exon_number "2"; gene_name "Zm00001d027333"; ref_gene_id "Zm00001d027333";
1	StringTie	exon	3109925	3110021	1000	+	.	gene_id "MSTRG.85"; transcript_id "Zm00001d027333_T022"; exon_number "3"; gene_name "Zm00001d027333"; ref_gene_id "Zm00001d027333";
1	StringTie	exon	3110149	3110162	1000	+	.	gene_id "MSTRG.85"; transcript_id "Zm00001d027333_T022"; exon_number "4"; gene_name "Zm00001d027333"; ref_gene_id "Zm00001d027333";
1	StringTie	exon	3122035	3122036	1000	+	.	gene_id "MSTRG.85"; transcript_id "Zm00001d027333_T022"; exon_number "5"; gene_name "Zm00001d027333"; ref_gene_id "Zm00001d027333";
1	StringTie	exon	3122130	3122314	1000	+	.	gene_id "MSTRG.85"; transcript_id "Zm00001d027333_T022"; exon_number "6"; gene_name "Zm00001d027333"; ref_gene_id "Zm00001d027333";
1	StringTie	transcript	3110164	3121173	1000	+	.	gene_id "MSTRG.85"; transcript_id "Zm00001d027333_T029"; gene_name "Zm00001d027333"; ref_gene_id "Zm00001d027333";
1	StringTie	exon	3110164	3110279	1000	+	.	gene_id "MSTRG.85"; transcript_id "Zm00001d027333_T029"; exon_number "1"; gene_name "Zm00001d027333"; ref_gene_id "Zm00001d027333";
1	StringTie	exon	3115821	3115821	1000	+	.	gene_id "MSTRG.85"; transcript_id "Zm00001d027333_T029"; exon_number "2"; gene_name "Zm00001d027333"; ref_gene_id "Zm00001d027333";
1	StringTie	exon	3120557	3120601	1000	+	.	gene_id "MSTRG.85"; transcript_id "Zm00001d027333_T029"; exon_number "3"; gene_name "Zm00001d027333"; ref_gene_id "Zm00001d027333";
1	StringTie	exon	3120687	3120765	1000	+	.	gene_id "MSTRG.85"; transcript_id "Zm00001d027333_T029"; exon_number "4"; gene_name "Zm00001d027333"; ref_gene_id "Zm00001d027333";
1	StringTie	exon	3120863	3120994	1000	+	.	gene_id "MSTRG.85"; transcript_id "Zm00001d027333_T029"; exon_number "5"; gene_name "Zm00001d027333"; ref_gene_id "Zm00001d027333";
1	StringTie	exon	3121143	3121173	1000	+	.	gene_id "MSTRG.85"; transcript_id "Zm00001d027333_T029"; exon_number "6"; gene_name "Zm00001d027333"; ref_gene_id "Zm00001d027333";
1	StringTie	transcript	3121370	3122314	1000	+	.	gene_id "MSTRG.85"; transcript_id "Zm00001d027333_T039"; gene_name "Zm00001d027333"; ref_gene_id "Zm00001d027333";
1	StringTie	exon	3121370	3121381	1000	+	.	gene_id "MSTRG.85"; transcript_id "Zm00001d027333_T039"; exon_number "1"; gene_name "Zm00001d027333"; ref_gene_id "Zm00001d027333";
1	StringTie	exon	3121961	3122040	1000	+	.	gene_id "MSTRG.85"; transcript_id "Zm00001d027333_T039"; exon_number "2"; gene_name "Zm00001d027333"; ref_gene_id "Zm00001d027333";
1	StringTie	exon	3122130	3122314	1000	+	.	gene_id "MSTRG.85"; transcript_id "Zm00001d027333_T039"; exon_number "3"; gene_name "Zm00001d027333"; ref_gene_id "Zm00001d027333";
1	StringTie	transcript	3121370	3122347	1000	+	.	gene_id "MSTRG.85"; transcript_id "Zm00001d027333_T026"; gene_name "Zm00001d027333"; ref_gene_id "Zm00001d027333";
1	StringTie	exon	3121370	3121381	1000	+	.	gene_id "MSTRG.85"; transcript_id "Zm00001d027333_T026"; exon_number "1"; gene_name "Zm00001d027333"; ref_gene_id "Zm00001d027333";
1	StringTie	exon	3121961	3122040	1000	+	.	gene_id "MSTRG.85"; transcript_id "Zm00001d027333_T026"; exon_number "2"; gene_name "Zm00001d027333"; ref_gene_id "Zm00001d027333";
1	StringTie	exon	3122130	3122248	1000	+	.	gene_id "MSTRG.85"; transcript_id "Zm00001d027333_T026"; exon_number "3"; gene_name "Zm00001d027333"; ref_gene_id "Zm00001d027333";
1	StringTie	exon	3122315	3122347	1000	+	.	gene_id "MSTRG.85"; transcript_id "Zm00001d027333_T026"; exon_number "4"; gene_name "Zm00001d027333"; ref_gene_id "Zm00001d027333";
1	StringTie	transcript	3225505	3226197	1000	+	.	gene_id "MSTRG.88"; transcript_id "Zm00001d027337_T018"; gene_name "Zm00001d027337"; ref_gene_id "Zm00001d027337";
1	StringTie	exon	3225505	3225534	1000	+	.	gene_id "MSTRG.88"; transcript_id "Zm00001d027337_T018"; exon_number "1"; gene_name "Zm00001d027337"; ref_gene_id "Zm00001d027337";
1	StringTie	exon	3225628	3225799	1000	+	.	gene_id "MSTRG.88"; transcript_id "Zm00001d027337_T018"; exon_number "2"; gene_name "Zm00001d027337"; ref_gene_id "Zm00001d027337";
1	StringTie	exon	3225871	3225941	1000	+	.	gene_id "MSTRG.88"; transcript_id "Zm00001d027337_T018"; exon_number "3"; gene_name "Zm00001d027337"; ref_gene_id "Zm00001d027337";
1	StringTie	exon	3226025	3226197	1000	+	.	gene_id "MSTRG.88"; transcript_id "Zm00001d027337_T018"; exon_number "4"; gene_name "Zm00001d027337"; ref_gene_id "Zm00001d027337";
1	StringTie	transcript	3287325	3288228	1000	+	.	gene_id "MSTRG.91"; transcript_id "Zm00001d027340_T011"; gene_name "Zm00001d027340"; ref_gene_id "Zm00001d027340";
1	StringTie	exon	3287325	3287375	1000	+	.	gene_id "MSTRG.91"; transcript_id "Zm00001d027340_T011"; exon_number "1"; gene_name "Zm00001d027340"; ref_gene_id "Zm00001d027340";
1	StringTie	exon	3287679	3288228	1000	+	.	gene_id "MSTRG.91"; transcript_id "Zm00001d027340_T011"; exon_number "2"; gene_name "Zm00001d027340"; ref_gene_id "Zm00001d027340";
1	StringTie	transcript	3293189	3294440	1000	-	.	gene_id "MSTRG.93"; transcript_id "Zm00001d027342_T002"; gene_name "Zm00001d027342"; ref_gene_id "Zm00001d027342";
1	StringTie	exon	3293189	3293375	1000	-	.	gene_id "MSTRG.93"; transcript_id "Zm00001d027342_T002"; exon_number "1"; gene_name "Zm00001d027342"; ref_gene_id "Zm00001d027342";
1	StringTie	exon	3294317	3294440	1000	-	.	gene_id "MSTRG.93"; transcript_id "Zm00001d027342_T002"; exon_number "2"; gene_name "Zm00001d027342"; ref_gene_id "Zm00001d027342";
1	StringTie	transcript	3373857	3374355	1000	+	.	gene_id "MSTRG.95"; transcript_id "Zm00001d027344_T008"; gene_name "Zm00001d027344"; ref_gene_id "Zm00001d027344";
1	StringTie	exon	3373857	3374144	1000	+	.	gene_id "MSTRG.95"; transcript_id "Zm00001d027344_T008"; exon_number "1"; gene_name "Zm00001d027344"; ref_gene_id "Zm00001d027344";
1	StringTie	exon	3374208	3374355	1000	+	.	gene_id "MSTRG.95"; transcript_id "Zm00001d027344_T008"; exon_number "2"; gene_name "Zm00001d027344"; ref_gene_id "Zm00001d027344";
1	StringTie	transcript	3374208	3374355	1000	+	.	gene_id "MSTRG.95"; transcript_id "Zm00001d027344_T007"; gene_name "Zm00001d027344"; ref_gene_id "Zm00001d027344";
1	StringTie	exon	3374208	3374355	1000	+	.	gene_id "MSTRG.95"; transcript_id "Zm00001d027344_T007"; exon_number "1"; gene_name "Zm00001d027344"; ref_gene_id "Zm00001d027344";
1	StringTie	transcript	3374208	3374666	1000	+	.	gene_id "MSTRG.95"; transcript_id "Zm00001d027344_T009"; gene_name "Zm00001d027344"; ref_gene_id "Zm00001d027344";
1	StringTie	exon	3374208	3374289	1000	+	.	gene_id "MSTRG.95"; transcript_id "Zm00001d027344_T009"; exon_number "1"; gene_name "Zm00001d027344"; ref_gene_id "Zm00001d027344";
1	StringTie	exon	3374429	3374666	1000	+	.	gene_id "MSTRG.95"; transcript_id "Zm00001d027344_T009"; exon_number "2"; gene_name "Zm00001d027344"; ref_gene_id "Zm00001d027344";
1	StringTie	transcript	3548934	3549369	1000	+	.	gene_id "MSTRG.106"; transcript_id "Zm00001d027354_T002"; gene_name "Zm00001d027354"; ref_gene_id "Zm00001d027354";
1	StringTie	exon	3548934	3549369	1000	+	.	gene_id "MSTRG.106"; transcript_id "Zm00001d027354_T002"; exon_number "1"; gene_name "Zm00001d027354"; ref_gene_id "Zm00001d027354";
1	StringTie	transcript	3808954	3809425	1000	+	.	gene_id "MSTRG.117"; transcript_id "Zm00001d027367_T001"; gene_name "pyrimidine deaminase1"; ref_gene_id "Zm00001d027367";
1	StringTie	exon	3808954	3809425	1000	+	.	gene_id "MSTRG.117"; transcript_id "Zm00001d027367_T001"; exon_number "1"; gene_name "pyrimidine deaminase1"; ref_gene_id "Zm00001d027367";
1	StringTie	transcript	3842457	3846284	1000	+	.	gene_id "MSTRG.119"; transcript_id "Zm00001d027369_T003"; gene_name "Zm00001d027369"; ref_gene_id "Zm00001d027369";
1	StringTie	exon	3842457	3842457	1000	+	.	gene_id "MSTRG.119"; transcript_id "Zm00001d027369_T003"; exon_number "1"; gene_name "Zm00001d027369"; ref_gene_id "Zm00001d027369";
1	StringTie	exon	3842916	3843097	1000	+	.	gene_id "MSTRG.119"; transcript_id "Zm00001d027369_T003"; exon_number "2"; gene_name "Zm00001d027369"; ref_gene_id "Zm00001d027369";
1	StringTie	exon	3843209	3843409	1000	+	.	gene_id "MSTRG.119"; transcript_id "Zm00001d027369_T003"; exon_number "3"; gene_name "Zm00001d027369"; ref_gene_id "Zm00001d027369";
1	StringTie	exon	3844487	3844525	1000	+	.	gene_id "MSTRG.119"; transcript_id "Zm00001d027369_T003"; exon_number "4"; gene_name "Zm00001d027369"; ref_gene_id "Zm00001d027369";
1	StringTie	exon	3844607	3844699	1000	+	.	gene_id "MSTRG.119"; transcript_id "Zm00001d027369_T003"; exon_number "5"; gene_name "Zm00001d027369"; ref_gene_id "Zm00001d027369";
1	StringTie	exon	3844717	3844935	1000	+	.	gene_id "MSTRG.119"; transcript_id "Zm00001d027369_T003"; exon_number "6"; gene_name "Zm00001d027369"; ref_gene_id "Zm00001d027369";
1	StringTie	exon	3845432	3845548	1000	+	.	gene_id "MSTRG.119"; transcript_id "Zm00001d027369_T003"; exon_number "7"; gene_name "Zm00001d027369"; ref_gene_id "Zm00001d027369";
1	StringTie	exon	3846001	3846284	1000	+	.	gene_id "MSTRG.119"; transcript_id "Zm00001d027369_T003"; exon_number "8"; gene_name "Zm00001d027369"; ref_gene_id "Zm00001d027369";
1	StringTie	transcript	3960865	3961551	1000	+	.	gene_id "MSTRG.123"; transcript_id "Zm00001d027373_T005"; gene_name "cell division control protein2 homolog"; ref_gene_id "Zm00001d027373";
1	StringTie	exon	3960865	3960887	1000	+	.	gene_id "MSTRG.123"; transcript_id "Zm00001d027373_T005"; exon_number "1"; gene_name "cell division control protein2 homolog"; ref_gene_id "Zm00001d027373";
1	StringTie	exon	3961201	3961551	1000	+	.	gene_id "MSTRG.123"; transcript_id "Zm00001d027373_T005"; exon_number "2"; gene_name "cell division control protein2 homolog"; ref_gene_id "Zm00001d027373";
1	StringTie	transcript	3964590	3964921	1000	+	.	gene_id "MSTRG.123"; transcript_id "Zm00001d027373_T006"; gene_name "cell division control protein2 homolog"; ref_gene_id "Zm00001d027373";
1	StringTie	exon	3964590	3964921	1000	+	.	gene_id "MSTRG.123"; transcript_id "Zm00001d027373_T006"; exon_number "1"; gene_name "cell division control protein2 homolog"; ref_gene_id "Zm00001d027373";
1	StringTie	transcript	3983899	3984174	1000	-	.	gene_id "MSTRG.126"; transcript_id "Zm00001d027376_T009"; gene_name "Zm00001d027376"; ref_gene_id "Zm00001d027376";
1	StringTie	exon	3983899	3983948	1000	-	.	gene_id "MSTRG.126"; transcript_id "Zm00001d027376_T009"; exon_number "1"; gene_name "Zm00001d027376"; ref_gene_id "Zm00001d027376";
1	StringTie	exon	3984041	3984174	1000	-	.	gene_id "MSTRG.126"; transcript_id "Zm00001d027376_T009"; exon_number "2"; gene_name "Zm00001d027376"; ref_gene_id "Zm00001d027376";
1	StringTie	transcript	4118921	4119025	1000	-	.	gene_id "MSTRG.135"; transcript_id "Zm00001d027385_T001"; gene_name "Zm00001d027385"; ref_gene_id "Zm00001d027385";
1	StringTie	exon	4118921	4119025	1000	-	.	gene_id "MSTRG.135"; transcript_id "Zm00001d027385_T001"; exon_number "1"; gene_name "Zm00001d027385"; ref_gene_id "Zm00001d027385";
1	StringTie	transcript	4118921	4120065	1000	-	.	gene_id "MSTRG.135"; transcript_id "Zm00001d027385_T005"; gene_name "Zm00001d027385"; ref_gene_id "Zm00001d027385";
1	StringTie	exon	4118921	4119025	1000	-	.	gene_id "MSTRG.135"; transcript_id "Zm00001d027385_T005"; exon_number "1"; gene_name "Zm00001d027385"; ref_gene_id "Zm00001d027385";
1	StringTie	exon	4119790	4120065	1000	-	.	gene_id "MSTRG.135"; transcript_id "Zm00001d027385_T005"; exon_number "2"; gene_name "Zm00001d027385"; ref_gene_id "Zm00001d027385";
1	StringTie	transcript	4119790	4120065	1000	-	.	gene_id "MSTRG.135"; transcript_id "Zm00001d027385_T004"; gene_name "Zm00001d027385"; ref_gene_id "Zm00001d027385";
1	StringTie	exon	4119790	4120065	1000	-	.	gene_id "MSTRG.135"; transcript_id "Zm00001d027385_T004"; exon_number "1"; gene_name "Zm00001d027385"; ref_gene_id "Zm00001d027385";
1	StringTie	transcript	4149732	4149992	1000	-	.	gene_id "MSTRG.139"; transcript_id "Zm00001d027389_T001"; gene_name "Zm00001d027389"; ref_gene_id "Zm00001d027389";
1	StringTie	exon	4149732	4149992	1000	-	.	gene_id "MSTRG.139"; transcript_id "Zm00001d027389_T001"; exon_number "1"; gene_name "Zm00001d027389"; ref_gene_id "Zm00001d027389";
1	StringTie	transcript	4221172	4236200	1000	+	.	gene_id "MSTRG.141"; transcript_id "Zm00001d027392_T036"; gene_name "Zm00001d027392"; ref_gene_id "Zm00001d027392";
1	StringTie	exon	4221172	4221370	1000	+	.	gene_id "MSTRG.141"; transcript_id "Zm00001d027392_T036"; exon_number "1"; gene_name "Zm00001d027392"; ref_gene_id "Zm00001d027392";
1	StringTie	exon	4222425	4222476	1000	+	.	gene_id "MSTRG.141"; transcript_id "Zm00001d027392_T036"; exon_number "2"; gene_name "Zm00001d027392"; ref_gene_id "Zm00001d027392";
1	StringTie	exon	4236079	4236200	1000	+	.	gene_id "MSTRG.141"; transcript_id "Zm00001d027392_T036"; exon_number "3"; gene_name "Zm00001d027392"; ref_gene_id "Zm00001d027392";
1	StringTie	transcript	4256234	4257766	1000	+	.	gene_id "MSTRG.141"; transcript_id "Zm00001d027392_T070"; gene_name "Zm00001d027392"; ref_gene_id "Zm00001d027392";
1	StringTie	exon	4256234	4256299	1000	+	.	gene_id "MSTRG.141"; transcript_id "Zm00001d027392_T070"; exon_number "1"; gene_name "Zm00001d027392"; ref_gene_id "Zm00001d027392";
1	StringTie	exon	4256409	4256569	1000	+	.	gene_id "MSTRG.141"; transcript_id "Zm00001d027392_T070"; exon_number "2"; gene_name "Zm00001d027392"; ref_gene_id "Zm00001d027392";
1	StringTie	exon	4256742	4257766	1000	+	.	gene_id "MSTRG.141"; transcript_id "Zm00001d027392_T070"; exon_number "3"; gene_name "Zm00001d027392"; ref_gene_id "Zm00001d027392";
1	StringTie	transcript	4293075	4293424	1000	+	.	gene_id "MSTRG.141"; transcript_id "Zm00001d027392_T062"; gene_name "Zm00001d027392"; ref_gene_id "Zm00001d027392";
1	StringTie	exon	4293075	4293167	1000	+	.	gene_id "MSTRG.141"; transcript_id "Zm00001d027392_T062"; exon_number "1"; gene_name "Zm00001d027392"; ref_gene_id "Zm00001d027392";
1	StringTie	exon	4293252	4293340	1000	+	.	gene_id "MSTRG.141"; transcript_id "Zm00001d027392_T062"; exon_number "2"; gene_name "Zm00001d027392"; ref_gene_id "Zm00001d027392";
1	StringTie	exon	4293372	4293424	1000	+	.	gene_id "MSTRG.141"; transcript_id "Zm00001d027392_T062"; exon_number "3"; gene_name "Zm00001d027392"; ref_gene_id "Zm00001d027392";
1	StringTie	transcript	4418069	4418682	1000	+	.	gene_id "MSTRG.150"; transcript_id "Zm00001d027402_T004"; gene_name "Zm00001d027402"; ref_gene_id "Zm00001d027402";
1	StringTie	exon	4418069	4418146	1000	+	.	gene_id "MSTRG.150"; transcript_id "Zm00001d027402_T004"; exon_number "1"; gene_name "Zm00001d027402"; ref_gene_id "Zm00001d027402";
1	StringTie	exon	4418235	4418337	1000	+	.	gene_id "MSTRG.150"; transcript_id "Zm00001d027402_T004"; exon_number "2"; gene_name "Zm00001d027402"; ref_gene_id "Zm00001d027402";
1	StringTie	exon	4418654	4418682	1000	+	.	gene_id "MSTRG.150"; transcript_id "Zm00001d027402_T004"; exon_number "3"; gene_name "Zm00001d027402"; ref_gene_id "Zm00001d027402";
1	StringTie	transcript	4418069	4419252	1000	+	.	gene_id "MSTRG.150"; transcript_id "Zm00001d027402_T005"; gene_name "Zm00001d027402"; ref_gene_id "Zm00001d027402";
1	StringTie	exon	4418069	4418146	1000	+	.	gene_id "MSTRG.150"; transcript_id "Zm00001d027402_T005"; exon_number "1"; gene_name "Zm00001d027402"; ref_gene_id "Zm00001d027402";
1	StringTie	exon	4418235	4418337	1000	+	.	gene_id "MSTRG.150"; transcript_id "Zm00001d027402_T005"; exon_number "2"; gene_name "Zm00001d027402"; ref_gene_id "Zm00001d027402";
1	StringTie	exon	4418654	4418682	1000	+	.	gene_id "MSTRG.150"; transcript_id "Zm00001d027402_T005"; exon_number "3"; gene_name "Zm00001d027402"; ref_gene_id "Zm00001d027402";
1	StringTie	exon	4418934	4419252	1000	+	.	gene_id "MSTRG.150"; transcript_id "Zm00001d027402_T005"; exon_number "4"; gene_name "Zm00001d027402"; ref_gene_id "Zm00001d027402";
1	StringTie	transcript	4418069	4421059	1000	+	.	gene_id "MSTRG.150"; transcript_id "Zm00001d027402_T002"; gene_name "Zm00001d027402"; ref_gene_id "Zm00001d027402";
1	StringTie	exon	4418069	4418146	1000	+	.	gene_id "MSTRG.150"; transcript_id "Zm00001d027402_T002"; exon_number "1"; gene_name "Zm00001d027402"; ref_gene_id "Zm00001d027402";
1	StringTie	exon	4418235	4418337	1000	+	.	gene_id "MSTRG.150"; transcript_id "Zm00001d027402_T002"; exon_number "2"; gene_name "Zm00001d027402"; ref_gene_id "Zm00001d027402";
1	StringTie	exon	4418654	4418682	1000	+	.	gene_id "MSTRG.150"; transcript_id "Zm00001d027402_T002"; exon_number "3"; gene_name "Zm00001d027402"; ref_gene_id "Zm00001d027402";
1	StringTie	exon	4419882	4419895	1000	+	.	gene_id "MSTRG.150"; transcript_id "Zm00001d027402_T002"; exon_number "4"; gene_name "Zm00001d027402"; ref_gene_id "Zm00001d027402";
1	StringTie	exon	4420272	4420333	1000	+	.	gene_id "MSTRG.150"; transcript_id "Zm00001d027402_T002"; exon_number "5"; gene_name "Zm00001d027402"; ref_gene_id "Zm00001d027402";
1	StringTie	exon	4420448	4420557	1000	+	.	gene_id "MSTRG.150"; transcript_id "Zm00001d027402_T002"; exon_number "6"; gene_name "Zm00001d027402"; ref_gene_id "Zm00001d027402";
1	StringTie	exon	4420660	4421059	1000	+	.	gene_id "MSTRG.150"; transcript_id "Zm00001d027402_T002"; exon_number "7"; gene_name "Zm00001d027402"; ref_gene_id "Zm00001d027402";
1	StringTie	transcript	4495363	4496407	1000	-	.	gene_id "MSTRG.151"; transcript_id "Zm00001d027403_T002"; gene_name "Zm00001d027403"; ref_gene_id "Zm00001d027403";
1	StringTie	exon	4495363	4495566	1000	-	.	gene_id "MSTRG.151"; transcript_id "Zm00001d027403_T002"; exon_number "1"; gene_name "Zm00001d027403"; ref_gene_id "Zm00001d027403";
1	StringTie	exon	4496326	4496407	1000	-	.	gene_id "MSTRG.151"; transcript_id "Zm00001d027403_T002"; exon_number "2"; gene_name "Zm00001d027403"; ref_gene_id "Zm00001d027403";
1	StringTie	transcript	4728716	4729342	1000	-	.	gene_id "MSTRG.159"; transcript_id "Zm00001d027412_T018"; gene_name "dicer-like 101"; ref_gene_id "Zm00001d027412";
1	StringTie	exon	4728716	4729342	1000	-	.	gene_id "MSTRG.159"; transcript_id "Zm00001d027412_T018"; exon_number "1"; gene_name "dicer-like 101"; ref_gene_id "Zm00001d027412";
1	StringTie	transcript	4834407	4837381	1000	+	.	gene_id "MSTRG.161"; transcript_id "Zm00001d027415_T008"; gene_name "autophagy1a"; ref_gene_id "Zm00001d027415";
1	StringTie	exon	4834407	4834448	1000	+	.	gene_id "MSTRG.161"; transcript_id "Zm00001d027415_T008"; exon_number "1"; gene_name "autophagy1a"; ref_gene_id "Zm00001d027415";
1	StringTie	exon	4834533	4834655	1000	+	.	gene_id "MSTRG.161"; transcript_id "Zm00001d027415_T008"; exon_number "2"; gene_name "autophagy1a"; ref_gene_id "Zm00001d027415";
1	StringTie	exon	4837042	4837240	1000	+	.	gene_id "MSTRG.161"; transcript_id "Zm00001d027415_T008"; exon_number "3"; gene_name "autophagy1a"; ref_gene_id "Zm00001d027415";
1	StringTie	exon	4837311	4837381	1000	+	.	gene_id "MSTRG.161"; transcript_id "Zm00001d027415_T008"; exon_number "4"; gene_name "autophagy1a"; ref_gene_id "Zm00001d027415";
1	StringTie	transcript	4979433	4979612	1000	-	.	gene_id "MSTRG.169"; transcript_id "Zm00001d027425_T002"; gene_name "agamous-like6"; ref_gene_id "Zm00001d027425";
1	StringTie	exon	4979433	4979612	1000	-	.	gene_id "MSTRG.169"; transcript_id "Zm00001d027425_T002"; exon_number "1"; gene_name "agamous-like6"; ref_gene_id "Zm00001d027425";
1	StringTie	transcript	5203581	5203687	1000	+	.	gene_id "MSTRG.178"; transcript_id "Zm00001d027435_T002"; gene_name "Homeobox-transcription factor 30"; ref_gene_id "Zm00001d027435";
1	StringTie	exon	5203581	5203687	1000	+	.	gene_id "MSTRG.178"; transcript_id "Zm00001d027435_T002"; exon_number "1"; gene_name "Homeobox-transcription factor 30"; ref_gene_id "Zm00001d027435";
1	StringTie	transcript	5496911	5497402	1000	-	.	gene_id "MSTRG.190"; transcript_id "Zm00001d027447_T008"; gene_name "Zm00001d027447"; ref_gene_id "Zm00001d027447";
1	StringTie	exon	5496911	5497021	1000	-	.	gene_id "MSTRG.190"; transcript_id "Zm00001d027447_T008"; exon_number "1"; gene_name "Zm00001d027447"; ref_gene_id "Zm00001d027447";
1	StringTie	exon	5497121	5497402	1000	-	.	gene_id "MSTRG.190"; transcript_id "Zm00001d027447_T008"; exon_number "2"; gene_name "Zm00001d027447"; ref_gene_id "Zm00001d027447";
1	StringTie	transcript	5522613	5523341	1000	+	.	gene_id "MSTRG.191"; transcript_id "Zm00001d027448_T010"; gene_name "Zm00001d027448"; ref_gene_id "Zm00001d027448";
1	StringTie	exon	5522613	5522852	1000	+	.	gene_id "MSTRG.191"; transcript_id "Zm00001d027448_T010"; exon_number "1"; gene_name "Zm00001d027448"; ref_gene_id "Zm00001d027448";
1	StringTie	exon	5522966	5523341	1000	+	.	gene_id "MSTRG.191"; transcript_id "Zm00001d027448_T010"; exon_number "2"; gene_name "Zm00001d027448"; ref_gene_id "Zm00001d027448";
1	StringTie	transcript	5529301	5530063	1000	-	.	gene_id "MSTRG.193"; transcript_id "Zm00001d027450_T007"; gene_name "Zm00001d027450"; ref_gene_id "Zm00001d027450";
1	StringTie	exon	5529301	5529393	1000	-	.	gene_id "MSTRG.193"; transcript_id "Zm00001d027450_T007"; exon_number "1"; gene_name "Zm00001d027450"; ref_gene_id "Zm00001d027450";
1	StringTie	exon	5529959	5530063	1000	-	.	gene_id "MSTRG.193"; transcript_id "Zm00001d027450_T007"; exon_number "2"; gene_name "Zm00001d027450"; ref_gene_id "Zm00001d027450";
1	StringTie	transcript	5529851	5532946	1000	-	.	gene_id "MSTRG.193"; transcript_id "Zm00001d027450_T005"; gene_name "Zm00001d027450"; ref_gene_id "Zm00001d027450";
1	StringTie	exon	5529851	5530063	1000	-	.	gene_id "MSTRG.193"; transcript_id "Zm00001d027450_T005"; exon_number "1"; gene_name "Zm00001d027450"; ref_gene_id "Zm00001d027450";
1	StringTie	exon	5532631	5532632	1000	-	.	gene_id "MSTRG.193"; transcript_id "Zm00001d027450_T005"; exon_number "2"; gene_name "Zm00001d027450"; ref_gene_id "Zm00001d027450";
1	StringTie	exon	5532757	5532946	1000	-	.	gene_id "MSTRG.193"; transcript_id "Zm00001d027450_T005"; exon_number "3"; gene_name "Zm00001d027450"; ref_gene_id "Zm00001d027450";
1	StringTie	transcript	5604065	5604467	1000	+	.	gene_id "MSTRG.197"; transcript_id "Zm00001d027454_T002"; gene_name "GRMZM2G055704"; ref_gene_id "Zm00001d027454";
1	StringTie	exon	5604065	5604467	1000	+	.	gene_id "MSTRG.197"; transcript_id "Zm00001d027454_T002"; exon_number "1"; gene_name "GRMZM2G055704"; ref_gene_id "Zm00001d027454";
1	StringTie	transcript	5824158	5825029	1000	-	.	gene_id "MSTRG.205"; transcript_id "Zm00001d027462_T007"; gene_name "FHA-transcription factor 1"; ref_gene_id "Zm00001d027462";
1	StringTie	exon	5824158	5824163	1000	-	.	gene_id "MSTRG.205"; transcript_id "Zm00001d027462_T007"; exon_number "1"; gene_name "FHA-transcription factor 1"; ref_gene_id "Zm00001d027462";
1	StringTie	exon	5824614	5825029	1000	-	.	gene_id "MSTRG.205"; transcript_id "Zm00001d027462_T007"; exon_number "2"; gene_name "FHA-transcription factor 1"; ref_gene_id "Zm00001d027462";
1	StringTie	transcript	6071808	6072302	1000	-	.	gene_id "MSTRG.215"; transcript_id "Zm00001d027472_T003"; gene_name "Zm00001d027472"; ref_gene_id "Zm00001d027472";
1	StringTie	exon	6071808	6072014	1000	-	.	gene_id "MSTRG.215"; transcript_id "Zm00001d027472_T003"; exon_number "1"; gene_name "Zm00001d027472"; ref_gene_id "Zm00001d027472";
1	StringTie	exon	6072155	6072302	1000	-	.	gene_id "MSTRG.215"; transcript_id "Zm00001d027472_T003"; exon_number "2"; gene_name "Zm00001d027472"; ref_gene_id "Zm00001d027472";
1	StringTie	transcript	6297641	6300940	1000	-	.	gene_id "MSTRG.224"; transcript_id "Zm00001d027484_T006"; gene_name "Zm00001d027484"; ref_gene_id "Zm00001d027484";
1	StringTie	exon	6297641	6297808	1000	-	.	gene_id "MSTRG.224"; transcript_id "Zm00001d027484_T006"; exon_number "1"; gene_name "Zm00001d027484"; ref_gene_id "Zm00001d027484";
1	StringTie	exon	6298073	6298255	1000	-	.	gene_id "MSTRG.224"; transcript_id "Zm00001d027484_T006"; exon_number "2"; gene_name "Zm00001d027484"; ref_gene_id "Zm00001d027484";
1	StringTie	exon	6298335	6298427	1000	-	.	gene_id "MSTRG.224"; transcript_id "Zm00001d027484_T006"; exon_number "3"; gene_name "Zm00001d027484"; ref_gene_id "Zm00001d027484";
1	StringTie	exon	6300500	6300583	1000	-	.	gene_id "MSTRG.224"; transcript_id "Zm00001d027484_T006"; exon_number "4"; gene_name "Zm00001d027484"; ref_gene_id "Zm00001d027484";
1	StringTie	exon	6300693	6300940	1000	-	.	gene_id "MSTRG.224"; transcript_id "Zm00001d027484_T006"; exon_number "5"; gene_name "Zm00001d027484"; ref_gene_id "Zm00001d027484";
1	StringTie	transcript	6320164	6321303	1000	-	.	gene_id "MSTRG.227"; transcript_id "Zm00001d027487_T009"; gene_name "Zm00001d027487"; ref_gene_id "Zm00001d027487";
1	StringTie	exon	6320164	6320301	1000	-	.	gene_id "MSTRG.227"; transcript_id "Zm00001d027487_T009"; exon_number "1"; gene_name "Zm00001d027487"; ref_gene_id "Zm00001d027487";
1	StringTie	exon	6321025	6321165	1000	-	.	gene_id "MSTRG.227"; transcript_id "Zm00001d027487_T009"; exon_number "2"; gene_name "Zm00001d027487"; ref_gene_id "Zm00001d027487";
1	StringTie	exon	6321244	6321303	1000	-	.	gene_id "MSTRG.227"; transcript_id "Zm00001d027487_T009"; exon_number "3"; gene_name "Zm00001d027487"; ref_gene_id "Zm00001d027487";
1	StringTie	transcript	6320164	6324075	1000	-	.	gene_id "MSTRG.227"; transcript_id "Zm00001d027487_T028"; gene_name "Zm00001d027487"; ref_gene_id "Zm00001d027487";
1	StringTie	exon	6320164	6320301	1000	-	.	gene_id "MSTRG.227"; transcript_id "Zm00001d027487_T028"; exon_number "1"; gene_name "Zm00001d027487"; ref_gene_id "Zm00001d027487";
1	StringTie	exon	6323023	6323034	1000	-	.	gene_id "MSTRG.227"; transcript_id "Zm00001d027487_T028"; exon_number "2"; gene_name "Zm00001d027487"; ref_gene_id "Zm00001d027487";
1	StringTie	exon	6323157	6323246	1000	-	.	gene_id "MSTRG.227"; transcript_id "Zm00001d027487_T028"; exon_number "3"; gene_name "Zm00001d027487"; ref_gene_id "Zm00001d027487";
1	StringTie	exon	6323854	6323906	1000	-	.	gene_id "MSTRG.227"; transcript_id "Zm00001d027487_T028"; exon_number "4"; gene_name "Zm00001d027487"; ref_gene_id "Zm00001d027487";
1	StringTie	exon	6324051	6324075	1000	-	.	gene_id "MSTRG.227"; transcript_id "Zm00001d027487_T028"; exon_number "5"; gene_name "Zm00001d027487"; ref_gene_id "Zm00001d027487";
1	StringTie	transcript	6321025	6321303	1000	-	.	gene_id "MSTRG.227"; transcript_id "Zm00001d027487_T007"; gene_name "Zm00001d027487"; ref_gene_id "Zm00001d027487";
1	StringTie	exon	6321025	6321165	1000	-	.	gene_id "MSTRG.227"; transcript_id "Zm00001d027487_T007"; exon_number "1"; gene_name "Zm00001d027487"; ref_gene_id "Zm00001d027487";
1	StringTie	exon	6321244	6321303	1000	-	.	gene_id "MSTRG.227"; transcript_id "Zm00001d027487_T007"; exon_number "2"; gene_name "Zm00001d027487"; ref_gene_id "Zm00001d027487";
1	StringTie	transcript	6323027	6324075	1000	-	.	gene_id "MSTRG.227"; transcript_id "Zm00001d027487_T027"; gene_name "Zm00001d027487"; ref_gene_id "Zm00001d027487";
1	StringTie	exon	6323027	6323034	1000	-	.	gene_id "MSTRG.227"; transcript_id "Zm00001d027487_T027"; exon_number "1"; gene_name "Zm00001d027487"; ref_gene_id "Zm00001d027487";
1	StringTie	exon	6323144	6323246	1000	-	.	gene_id "MSTRG.227"; transcript_id "Zm00001d027487_T027"; exon_number "2"; gene_name "Zm00001d027487"; ref_gene_id "Zm00001d027487";
1	StringTie	exon	6323854	6323906	1000	-	.	gene_id "MSTRG.227"; transcript_id "Zm00001d027487_T027"; exon_number "3"; gene_name "Zm00001d027487"; ref_gene_id "Zm00001d027487";
1	StringTie	exon	6324051	6324075	1000	-	.	gene_id "MSTRG.227"; transcript_id "Zm00001d027487_T027"; exon_number "4"; gene_name "Zm00001d027487"; ref_gene_id "Zm00001d027487";
1	StringTie	transcript	6323247	6325930	1000	-	.	gene_id "MSTRG.227"; transcript_id "Zm00001d027487_T022"; gene_name "Zm00001d027487"; ref_gene_id "Zm00001d027487";
1	StringTie	exon	6323247	6323248	1000	-	.	gene_id "MSTRG.227"; transcript_id "Zm00001d027487_T022"; exon_number "1"; gene_name "Zm00001d027487"; ref_gene_id "Zm00001d027487";
1	StringTie	exon	6323856	6323906	1000	-	.	gene_id "MSTRG.227"; transcript_id "Zm00001d027487_T022"; exon_number "2"; gene_name "Zm00001d027487"; ref_gene_id "Zm00001d027487";
1	StringTie	exon	6324051	6324075	1000	-	.	gene_id "MSTRG.227"; transcript_id "Zm00001d027487_T022"; exon_number "3"; gene_name "Zm00001d027487"; ref_gene_id "Zm00001d027487";
1	StringTie	exon	6325562	6325584	1000	-	.	gene_id "MSTRG.227"; transcript_id "Zm00001d027487_T022"; exon_number "4"; gene_name "Zm00001d027487"; ref_gene_id "Zm00001d027487";
1	StringTie	exon	6325695	6325930	1000	-	.	gene_id "MSTRG.227"; transcript_id "Zm00001d027487_T022"; exon_number "5"; gene_name "Zm00001d027487"; ref_gene_id "Zm00001d027487";
1	StringTie	transcript	6326621	6327128	1000	-	.	gene_id "MSTRG.227"; transcript_id "Zm00001d027487_T013"; gene_name "Zm00001d027487"; ref_gene_id "Zm00001d027487";
1	StringTie	exon	6326621	6326646	1000	-	.	gene_id "MSTRG.227"; transcript_id "Zm00001d027487_T013"; exon_number "1"; gene_name "Zm00001d027487"; ref_gene_id "Zm00001d027487";
1	StringTie	exon	6326802	6326924	1000	-	.	gene_id "MSTRG.227"; transcript_id "Zm00001d027487_T013"; exon_number "2"; gene_name "Zm00001d027487"; ref_gene_id "Zm00001d027487";
1	StringTie	exon	6327024	6327128	1000	-	.	gene_id "MSTRG.227"; transcript_id "Zm00001d027487_T013"; exon_number "3"; gene_name "Zm00001d027487"; ref_gene_id "Zm00001d027487";
1	StringTie	transcript	6797947	6798604	1000	+	.	gene_id "MSTRG.240"; transcript_id "Zm00001d027500_T001"; gene_name "flower-specific gamma-thionin1"; ref_gene_id "Zm00001d027500";
1	StringTie	exon	6797947	6798010	1000	+	.	gene_id "MSTRG.240"; transcript_id "Zm00001d027500_T001"; exon_number "1"; gene_name "flower-specific gamma-thionin1"; ref_gene_id "Zm00001d027500";
1	StringTie	exon	6798135	6798604	1000	+	.	gene_id "MSTRG.240"; transcript_id "Zm00001d027500_T001"; exon_number "2"; gene_name "flower-specific gamma-thionin1"; ref_gene_id "Zm00001d027500";
1	StringTie	transcript	6911184	6911918	1000	-	.	gene_id "MSTRG.244"; transcript_id "Zm00001d027504_T001"; gene_name "php20537b"; ref_gene_id "Zm00001d027504";
1	StringTie	exon	6911184	6911190	1000	-	.	gene_id "MSTRG.244"; transcript_id "Zm00001d027504_T001"; exon_number "1"; gene_name "php20537b"; ref_gene_id "Zm00001d027504";
1	StringTie	exon	6911416	6911918	1000	-	.	gene_id "MSTRG.244"; transcript_id "Zm00001d027504_T001"; exon_number "2"; gene_name "php20537b"; ref_gene_id "Zm00001d027504";
1	StringTie	transcript	6911184	6912220	1000	-	.	gene_id "MSTRG.244"; transcript_id "Zm00001d027504_T002"; gene_name "php20537b"; ref_gene_id "Zm00001d027504";
1	StringTie	exon	6911184	6911190	1000	-	.	gene_id "MSTRG.244"; transcript_id "Zm00001d027504_T002"; exon_number "1"; gene_name "php20537b"; ref_gene_id "Zm00001d027504";
1	StringTie	exon	6911416	6911568	1000	-	.	gene_id "MSTRG.244"; transcript_id "Zm00001d027504_T002"; exon_number "2"; gene_name "php20537b"; ref_gene_id "Zm00001d027504";
1	StringTie	exon	6912058	6912220	1000	-	.	gene_id "MSTRG.244"; transcript_id "Zm00001d027504_T002"; exon_number "3"; gene_name "php20537b"; ref_gene_id "Zm00001d027504";
1	StringTie	transcript	6911352	6912220	1000	-	.	gene_id "MSTRG.244"; transcript_id "Zm00001d027504_T003"; gene_name "php20537b"; ref_gene_id "Zm00001d027504";
1	StringTie	exon	6911352	6911568	1000	-	.	gene_id "MSTRG.244"; transcript_id "Zm00001d027504_T003"; exon_number "1"; gene_name "php20537b"; ref_gene_id "Zm00001d027504";
1	StringTie	exon	6912058	6912220	1000	-	.	gene_id "MSTRG.244"; transcript_id "Zm00001d027504_T003"; exon_number "2"; gene_name "php20537b"; ref_gene_id "Zm00001d027504";
1	StringTie	transcript	6918008	6918536	1000	-	.	gene_id "MSTRG.245"; transcript_id "Zm00001d027505_T002"; gene_name "Zm00001d027505"; ref_gene_id "Zm00001d027505";
1	StringTie	exon	6918008	6918135	1000	-	.	gene_id "MSTRG.245"; transcript_id "Zm00001d027505_T002"; exon_number "1"; gene_name "Zm00001d027505"; ref_gene_id "Zm00001d027505";
1	StringTie	exon	6918230	6918317	1000	-	.	gene_id "MSTRG.245"; transcript_id "Zm00001d027505_T002"; exon_number "2"; gene_name "Zm00001d027505"; ref_gene_id "Zm00001d027505";
1	StringTie	exon	6918398	6918536	1000	-	.	gene_id "MSTRG.245"; transcript_id "Zm00001d027505_T002"; exon_number "3"; gene_name "Zm00001d027505"; ref_gene_id "Zm00001d027505";
1	StringTie	transcript	7177930	7178300	1000	-	.	gene_id "MSTRG.256"; transcript_id "Zm00001d027514_T004"; gene_name "Zm00001d027514"; ref_gene_id "Zm00001d027514";
1	StringTie	exon	7177930	7178078	1000	-	.	gene_id "MSTRG.256"; transcript_id "Zm00001d027514_T004"; exon_number "1"; gene_name "Zm00001d027514"; ref_gene_id "Zm00001d027514";
1	StringTie	exon	7178217	7178300	1000	-	.	gene_id "MSTRG.256"; transcript_id "Zm00001d027514_T004"; exon_number "2"; gene_name "Zm00001d027514"; ref_gene_id "Zm00001d027514";
1	StringTie	transcript	7254793	7254969	1000	+	.	gene_id "MSTRG.257"; transcript_id "Zm00001d027515_T009"; gene_name "Zm00001d027515"; ref_gene_id "Zm00001d027515";
1	StringTie	exon	7254793	7254969	1000	+	.	gene_id "MSTRG.257"; transcript_id "Zm00001d027515_T009"; exon_number "1"; gene_name "Zm00001d027515"; ref_gene_id "Zm00001d027515";
1	StringTie	transcript	7254793	7256830	1000	+	.	gene_id "MSTRG.257"; transcript_id "Zm00001d027515_T010"; gene_name "Zm00001d027515"; ref_gene_id "Zm00001d027515";
1	StringTie	exon	7254793	7254969	1000	+	.	gene_id "MSTRG.257"; transcript_id "Zm00001d027515_T010"; exon_number "1"; gene_name "Zm00001d027515"; ref_gene_id "Zm00001d027515";
1	StringTie	exon	7255073	7255093	1000	+	.	gene_id "MSTRG.257"; transcript_id "Zm00001d027515_T010"; exon_number "2"; gene_name "Zm00001d027515"; ref_gene_id "Zm00001d027515";
1	StringTie	exon	7255171	7255326	1000	+	.	gene_id "MSTRG.257"; transcript_id "Zm00001d027515_T010"; exon_number "3"; gene_name "Zm00001d027515"; ref_gene_id "Zm00001d027515";
1	StringTie	exon	7255620	7255632	1000	+	.	gene_id "MSTRG.257"; transcript_id "Zm00001d027515_T010"; exon_number "4"; gene_name "Zm00001d027515"; ref_gene_id "Zm00001d027515";
1	StringTie	exon	7255706	7255815	1000	+	.	gene_id "MSTRG.257"; transcript_id "Zm00001d027515_T010"; exon_number "5"; gene_name "Zm00001d027515"; ref_gene_id "Zm00001d027515";
1	StringTie	exon	7255920	7256027	1000	+	.	gene_id "MSTRG.257"; transcript_id "Zm00001d027515_T010"; exon_number "6"; gene_name "Zm00001d027515"; ref_gene_id "Zm00001d027515";
1	StringTie	exon	7256129	7256830	1000	+	.	gene_id "MSTRG.257"; transcript_id "Zm00001d027515_T010"; exon_number "7"; gene_name "Zm00001d027515"; ref_gene_id "Zm00001d027515";
1	StringTie	transcript	7255620	7256128	1000	+	.	gene_id "MSTRG.257"; transcript_id "Zm00001d027515_T005"; gene_name "Zm00001d027515"; ref_gene_id "Zm00001d027515";
1	StringTie	exon	7255620	7255632	1000	+	.	gene_id "MSTRG.257"; transcript_id "Zm00001d027515_T005"; exon_number "1"; gene_name "Zm00001d027515"; ref_gene_id "Zm00001d027515";
1	StringTie	exon	7255706	7255815	1000	+	.	gene_id "MSTRG.257"; transcript_id "Zm00001d027515_T005"; exon_number "2"; gene_name "Zm00001d027515"; ref_gene_id "Zm00001d027515";
1	StringTie	exon	7255920	7256128	1000	+	.	gene_id "MSTRG.257"; transcript_id "Zm00001d027515_T005"; exon_number "3"; gene_name "Zm00001d027515"; ref_gene_id "Zm00001d027515";
1	StringTie	transcript	7299697	7300800	1000	+	.	gene_id "MSTRG.259"; transcript_id "Zm00001d027517_T003"; gene_name "Zm00001d027517"; ref_gene_id "Zm00001d027517";
1	StringTie	exon	7299697	7299741	1000	+	.	gene_id "MSTRG.259"; transcript_id "Zm00001d027517_T003"; exon_number "1"; gene_name "Zm00001d027517"; ref_gene_id "Zm00001d027517";
1	StringTie	exon	7299990	7300127	1000	+	.	gene_id "MSTRG.259"; transcript_id "Zm00001d027517_T003"; exon_number "2"; gene_name "Zm00001d027517"; ref_gene_id "Zm00001d027517";
1	StringTie	exon	7300369	7300800	1000	+	.	gene_id "MSTRG.259"; transcript_id "Zm00001d027517_T003"; exon_number "3"; gene_name "Zm00001d027517"; ref_gene_id "Zm00001d027517";
1	StringTie	transcript	7299990	7300800	1000	+	.	gene_id "MSTRG.259"; transcript_id "Zm00001d027517_T002"; gene_name "Zm00001d027517"; ref_gene_id "Zm00001d027517";
1	StringTie	exon	7299990	7300127	1000	+	.	gene_id "MSTRG.259"; transcript_id "Zm00001d027517_T002"; exon_number "1"; gene_name "Zm00001d027517"; ref_gene_id "Zm00001d027517";
1	StringTie	exon	7300369	7300800	1000	+	.	gene_id "MSTRG.259"; transcript_id "Zm00001d027517_T002"; exon_number "2"; gene_name "Zm00001d027517"; ref_gene_id "Zm00001d027517";
1	StringTie	transcript	7459068	7459538	1000	-	.	gene_id "MSTRG.267"; transcript_id "Zm00001d027527_T003"; gene_name "Zm00001d027527"; ref_gene_id "Zm00001d027527";
1	StringTie	exon	7459068	7459153	1000	-	.	gene_id "MSTRG.267"; transcript_id "Zm00001d027527_T003"; exon_number "1"; gene_name "Zm00001d027527"; ref_gene_id "Zm00001d027527";
1	StringTie	exon	7459175	7459538	1000	-	.	gene_id "MSTRG.267"; transcript_id "Zm00001d027527_T003"; exon_number "2"; gene_name "Zm00001d027527"; ref_gene_id "Zm00001d027527";
1	StringTie	transcript	7559860	7561419	1000	+	.	gene_id "MSTRG.271"; transcript_id "Zm00001d027532_T004"; gene_name "Zm00001d027532"; ref_gene_id "Zm00001d027532";
1	StringTie	exon	7559860	7559904	1000	+	.	gene_id "MSTRG.271"; transcript_id "Zm00001d027532_T004"; exon_number "1"; gene_name "Zm00001d027532"; ref_gene_id "Zm00001d027532";
1	StringTie	exon	7560885	7560924	1000	+	.	gene_id "MSTRG.271"; transcript_id "Zm00001d027532_T004"; exon_number "2"; gene_name "Zm00001d027532"; ref_gene_id "Zm00001d027532";
1	StringTie	exon	7561145	7561226	1000	+	.	gene_id "MSTRG.271"; transcript_id "Zm00001d027532_T004"; exon_number "3"; gene_name "Zm00001d027532"; ref_gene_id "Zm00001d027532";
1	StringTie	exon	7561340	7561419	1000	+	.	gene_id "MSTRG.271"; transcript_id "Zm00001d027532_T004"; exon_number "4"; gene_name "Zm00001d027532"; ref_gene_id "Zm00001d027532";
1	StringTie	transcript	7688972	7689327	1000	-	.	gene_id "MSTRG.275"; transcript_id "Zm00001d027536_T004"; gene_name "Zm00001d027536"; ref_gene_id "Zm00001d027536";
1	StringTie	exon	7688972	7689175	1000	-	.	gene_id "MSTRG.275"; transcript_id "Zm00001d027536_T004"; exon_number "1"; gene_name "Zm00001d027536"; ref_gene_id "Zm00001d027536";
1	StringTie	exon	7689319	7689327	1000	-	.	gene_id "MSTRG.275"; transcript_id "Zm00001d027536_T004"; exon_number "2"; gene_name "Zm00001d027536"; ref_gene_id "Zm00001d027536";
1	StringTie	transcript	7688972	7697349	1000	-	.	gene_id "MSTRG.275"; transcript_id "Zm00001d027536_T007"; gene_name "Zm00001d027536"; ref_gene_id "Zm00001d027536";
1	StringTie	exon	7688972	7689175	1000	-	.	gene_id "MSTRG.275"; transcript_id "Zm00001d027536_T007"; exon_number "1"; gene_name "Zm00001d027536"; ref_gene_id "Zm00001d027536";
1	StringTie	exon	7697344	7697349	1000	-	.	gene_id "MSTRG.275"; transcript_id "Zm00001d027536_T007"; exon_number "2"; gene_name "Zm00001d027536"; ref_gene_id "Zm00001d027536";
1	StringTie	transcript	7688972	7699287	1000	-	.	gene_id "MSTRG.275"; transcript_id "Zm00001d027536_T005"; gene_name "Zm00001d027536"; ref_gene_id "Zm00001d027536";
1	StringTie	exon	7688972	7689175	1000	-	.	gene_id "MSTRG.275"; transcript_id "Zm00001d027536_T005"; exon_number "1"; gene_name "Zm00001d027536"; ref_gene_id "Zm00001d027536";
1	StringTie	exon	7697344	7697349	1000	-	.	gene_id "MSTRG.275"; transcript_id "Zm00001d027536_T005"; exon_number "2"; gene_name "Zm00001d027536"; ref_gene_id "Zm00001d027536";
1	StringTie	exon	7698845	7698886	1000	-	.	gene_id "MSTRG.275"; transcript_id "Zm00001d027536_T005"; exon_number "3"; gene_name "Zm00001d027536"; ref_gene_id "Zm00001d027536";
1	StringTie	exon	7698980	7699287	1000	-	.	gene_id "MSTRG.275"; transcript_id "Zm00001d027536_T005"; exon_number "4"; gene_name "Zm00001d027536"; ref_gene_id "Zm00001d027536";
1	StringTie	transcript	7688972	7699652	1000	-	.	gene_id "MSTRG.275"; transcript_id "Zm00001d027536_T009"; gene_name "Zm00001d027536"; ref_gene_id "Zm00001d027536";
1	StringTie	exon	7688972	7689175	1000	-	.	gene_id "MSTRG.275"; transcript_id "Zm00001d027536_T009"; exon_number "1"; gene_name "Zm00001d027536"; ref_gene_id "Zm00001d027536";
1	StringTie	exon	7697344	7697349	1000	-	.	gene_id "MSTRG.275"; transcript_id "Zm00001d027536_T009"; exon_number "2"; gene_name "Zm00001d027536"; ref_gene_id "Zm00001d027536";
1	StringTie	exon	7698845	7698886	1000	-	.	gene_id "MSTRG.275"; transcript_id "Zm00001d027536_T009"; exon_number "3"; gene_name "Zm00001d027536"; ref_gene_id "Zm00001d027536";
1	StringTie	exon	7698980	7699075	1000	-	.	gene_id "MSTRG.275"; transcript_id "Zm00001d027536_T009"; exon_number "4"; gene_name "Zm00001d027536"; ref_gene_id "Zm00001d027536";
1	StringTie	exon	7699288	7699347	1000	-	.	gene_id "MSTRG.275"; transcript_id "Zm00001d027536_T009"; exon_number "5"; gene_name "Zm00001d027536"; ref_gene_id "Zm00001d027536";
1	StringTie	exon	7699455	7699652	1000	-	.	gene_id "MSTRG.275"; transcript_id "Zm00001d027536_T009"; exon_number "6"; gene_name "Zm00001d027536"; ref_gene_id "Zm00001d027536";
1	StringTie	transcript	7878810	7879915	1000	-	.	gene_id "MSTRG.279"; transcript_id "Zm00001d027540_T002"; gene_name "glutathione S-transferase12"; ref_gene_id "Zm00001d027540";
1	StringTie	exon	7878810	7879049	1000	-	.	gene_id "MSTRG.279"; transcript_id "Zm00001d027540_T002"; exon_number "1"; gene_name "glutathione S-transferase12"; ref_gene_id "Zm00001d027540";
1	StringTie	exon	7879598	7879915	1000	-	.	gene_id "MSTRG.279"; transcript_id "Zm00001d027540_T002"; exon_number "2"; gene_name "glutathione S-transferase12"; ref_gene_id "Zm00001d027540";
1	StringTie	transcript	7882429	7882907	1000	-	.	gene_id "MSTRG.280"; transcript_id "Zm00001d027541_T002"; gene_name "glutathione transferase9"; ref_gene_id "Zm00001d027541";
1	StringTie	exon	7882429	7882907	1000	-	.	gene_id "MSTRG.280"; transcript_id "Zm00001d027541_T002"; exon_number "1"; gene_name "glutathione transferase9"; ref_gene_id "Zm00001d027541";
1	StringTie	transcript	8287623	8287895	1000	-	.	gene_id "MSTRG.305"; transcript_id "Zm00001d027571_T008"; gene_name "Zm00001d027571"; ref_gene_id "Zm00001d027571";
1	StringTie	exon	8287623	8287895	1000	-	.	gene_id "MSTRG.305"; transcript_id "Zm00001d027571_T008"; exon_number "1"; gene_name "Zm00001d027571"; ref_gene_id "Zm00001d027571";
1	StringTie	transcript	8302544	8302633	1000	+	.	gene_id "MSTRG.306"; transcript_id "Zm00001d027572_T004"; gene_name "Zm00001d027572"; ref_gene_id "Zm00001d027572";
1	StringTie	exon	8302544	8302633	1000	+	.	gene_id "MSTRG.306"; transcript_id "Zm00001d027572_T004"; exon_number "1"; gene_name "Zm00001d027572"; ref_gene_id "Zm00001d027572";
1	StringTie	transcript	8302544	8308349	1000	+	.	gene_id "MSTRG.306"; transcript_id "Zm00001d027572_T005"; gene_name "Zm00001d027572"; ref_gene_id "Zm00001d027572";
1	StringTie	exon	8302544	8302633	1000	+	.	gene_id "MSTRG.306"; transcript_id "Zm00001d027572_T005"; exon_number "1"; gene_name "Zm00001d027572"; ref_gene_id "Zm00001d027572";
1	StringTie	exon	8307701	8308349	1000	+	.	gene_id "MSTRG.306"; transcript_id "Zm00001d027572_T005"; exon_number "2"; gene_name "Zm00001d027572"; ref_gene_id "Zm00001d027572";
1	StringTie	transcript	8335695	8336362	1000	+	.	gene_id "MSTRG.308"; transcript_id "Zm00001d027576_T006"; gene_name "Zm00001d027576"; ref_gene_id "Zm00001d027576";
1	StringTie	exon	8335695	8335697	1000	+	.	gene_id "MSTRG.308"; transcript_id "Zm00001d027576_T006"; exon_number "1"; gene_name "Zm00001d027576"; ref_gene_id "Zm00001d027576";
1	StringTie	exon	8335819	8336362	1000	+	.	gene_id "MSTRG.308"; transcript_id "Zm00001d027576_T006"; exon_number "2"; gene_name "Zm00001d027576"; ref_gene_id "Zm00001d027576";
1	StringTie	transcript	8335789	8336362	1000	+	.	gene_id "MSTRG.308"; transcript_id "Zm00001d027576_T003"; gene_name "Zm00001d027576"; ref_gene_id "Zm00001d027576";
1	StringTie	exon	8335789	8336362	1000	+	.	gene_id "MSTRG.308"; transcript_id "Zm00001d027576_T003"; exon_number "1"; gene_name "Zm00001d027576"; ref_gene_id "Zm00001d027576";
1	StringTie	transcript	8552983	8555554	1000	+	.	gene_id "MSTRG.317"; transcript_id "Zm00001d027588_T001"; gene_name "Zm00001d027588"; ref_gene_id "Zm00001d027588";
1	StringTie	exon	8552983	8553248	1000	+	.	gene_id "MSTRG.317"; transcript_id "Zm00001d027588_T001"; exon_number "1"; gene_name "Zm00001d027588"; ref_gene_id "Zm00001d027588";
1	StringTie	exon	8553589	8555554	1000	+	.	gene_id "MSTRG.317"; transcript_id "Zm00001d027588_T001"; exon_number "2"; gene_name "Zm00001d027588"; ref_gene_id "Zm00001d027588";
1	StringTie	transcript	8661988	8665065	1000	+	.	gene_id "MSTRG.323"; transcript_id "Zm00001d027595_T001"; gene_name "Zm00001d027595"; ref_gene_id "Zm00001d027595";
1	StringTie	exon	8661988	8662000	1000	+	.	gene_id "MSTRG.323"; transcript_id "Zm00001d027595_T001"; exon_number "1"; gene_name "Zm00001d027595"; ref_gene_id "Zm00001d027595";
1	StringTie	exon	8664520	8664561	1000	+	.	gene_id "MSTRG.323"; transcript_id "Zm00001d027595_T001"; exon_number "2"; gene_name "Zm00001d027595"; ref_gene_id "Zm00001d027595";
1	StringTie	exon	8664650	8665065	1000	+	.	gene_id "MSTRG.323"; transcript_id "Zm00001d027595_T001"; exon_number "3"; gene_name "Zm00001d027595"; ref_gene_id "Zm00001d027595";
1	StringTie	transcript	8667067	8671854	1000	-	.	gene_id "MSTRG.324"; transcript_id "Zm00001d027596_T005"; gene_name "Zm00001d027596"; ref_gene_id "Zm00001d027596";
1	StringTie	exon	8667067	8667201	1000	-	.	gene_id "MSTRG.324"; transcript_id "Zm00001d027596_T005"; exon_number "1"; gene_name "Zm00001d027596"; ref_gene_id "Zm00001d027596";
1	StringTie	exon	8670461	8671854	1000	-	.	gene_id "MSTRG.324"; transcript_id "Zm00001d027596_T005"; exon_number "2"; gene_name "Zm00001d027596"; ref_gene_id "Zm00001d027596";
1	StringTie	transcript	8670461	8671854	1000	-	.	gene_id "MSTRG.324"; transcript_id "Zm00001d027596_T009"; gene_name "Zm00001d027596"; ref_gene_id "Zm00001d027596";
1	StringTie	exon	8670461	8671854	1000	-	.	gene_id "MSTRG.324"; transcript_id "Zm00001d027596_T009"; exon_number "1"; gene_name "Zm00001d027596"; ref_gene_id "Zm00001d027596";
1	StringTie	transcript	9012651	9012820	1000	-	.	gene_id "MSTRG.338"; transcript_id "Zm00001d027612_T002"; gene_name "Zm00001d027612"; ref_gene_id "Zm00001d027612";
1	StringTie	exon	9012651	9012820	1000	-	.	gene_id "MSTRG.338"; transcript_id "Zm00001d027612_T002"; exon_number "1"; gene_name "Zm00001d027612"; ref_gene_id "Zm00001d027612";
1	StringTie	transcript	9015472	9016646	1000	-	.	gene_id "MSTRG.339"; transcript_id "Zm00001d027613_T001"; gene_name "Zm00001d027613"; ref_gene_id "Zm00001d027613";
1	StringTie	exon	9015472	9015690	1000	-	.	gene_id "MSTRG.339"; transcript_id "Zm00001d027613_T001"; exon_number "1"; gene_name "Zm00001d027613"; ref_gene_id "Zm00001d027613";
1	StringTie	exon	9016205	9016646	1000	-	.	gene_id "MSTRG.339"; transcript_id "Zm00001d027613_T001"; exon_number "2"; gene_name "Zm00001d027613"; ref_gene_id "Zm00001d027613";
1	StringTie	transcript	9121532	9122436	1000	+	.	gene_id "MSTRG.343"; transcript_id "Zm00001d027619_T005"; gene_name "beta amylase2"; ref_gene_id "Zm00001d027619";
1	StringTie	exon	9121532	9121705	1000	+	.	gene_id "MSTRG.343"; transcript_id "Zm00001d027619_T005"; exon_number "1"; gene_name "beta amylase2"; ref_gene_id "Zm00001d027619";
1	StringTie	exon	9122246	9122436	1000	+	.	gene_id "MSTRG.343"; transcript_id "Zm00001d027619_T005"; exon_number "2"; gene_name "beta amylase2"; ref_gene_id "Zm00001d027619";
1	StringTie	transcript	9355529	9355695	1000	-	.	gene_id "MSTRG.350"; transcript_id "Zm00001d022667_T001"; gene_name "Zm00001d022667"; ref_gene_id "Zm00001d022667";
1	StringTie	exon	9355529	9355695	1000	-	.	gene_id "MSTRG.350"; transcript_id "Zm00001d022667_T001"; exon_number "1"; gene_name "Zm00001d022667"; ref_gene_id "Zm00001d022667";
1	StringTie	transcript	9408331	9409177	1000	-	.	gene_id "MSTRG.352"; transcript_id "Zm00001d027626_T008"; gene_name "Zm00001d027626"; ref_gene_id "Zm00001d027626";
1	StringTie	exon	9408331	9408417	1000	-	.	gene_id "MSTRG.352"; transcript_id "Zm00001d027626_T008"; exon_number "1"; gene_name "Zm00001d027626"; ref_gene_id "Zm00001d027626";
1	StringTie	exon	9408998	9409048	1000	-	.	gene_id "MSTRG.352"; transcript_id "Zm00001d027626_T008"; exon_number "2"; gene_name "Zm00001d027626"; ref_gene_id "Zm00001d027626";
1	StringTie	exon	9409139	9409177	1000	-	.	gene_id "MSTRG.352"; transcript_id "Zm00001d027626_T008"; exon_number "3"; gene_name "Zm00001d027626"; ref_gene_id "Zm00001d027626";
1	StringTie	transcript	9408965	9409177	1000	-	.	gene_id "MSTRG.352"; transcript_id "Zm00001d027626_T011"; gene_name "Zm00001d027626"; ref_gene_id "Zm00001d027626";
1	StringTie	exon	9408965	9409048	1000	-	.	gene_id "MSTRG.352"; transcript_id "Zm00001d027626_T011"; exon_number "1"; gene_name "Zm00001d027626"; ref_gene_id "Zm00001d027626";
1	StringTie	exon	9409139	9409177	1000	-	.	gene_id "MSTRG.352"; transcript_id "Zm00001d027626_T011"; exon_number "2"; gene_name "Zm00001d027626"; ref_gene_id "Zm00001d027626";
1	StringTie	transcript	9408965	9411381	1000	-	.	gene_id "MSTRG.352"; transcript_id "Zm00001d027626_T009"; gene_name "Zm00001d027626"; ref_gene_id "Zm00001d027626";
1	StringTie	exon	9408965	9409048	1000	-	.	gene_id "MSTRG.352"; transcript_id "Zm00001d027626_T009"; exon_number "1"; gene_name "Zm00001d027626"; ref_gene_id "Zm00001d027626";
1	StringTie	exon	9409139	9409177	1000	-	.	gene_id "MSTRG.352"; transcript_id "Zm00001d027626_T009"; exon_number "2"; gene_name "Zm00001d027626"; ref_gene_id "Zm00001d027626";
1	StringTie	exon	9409989	9410048	1000	-	.	gene_id "MSTRG.352"; transcript_id "Zm00001d027626_T009"; exon_number "3"; gene_name "Zm00001d027626"; ref_gene_id "Zm00001d027626";
1	StringTie	exon	9410143	9410193	1000	-	.	gene_id "MSTRG.352"; transcript_id "Zm00001d027626_T009"; exon_number "4"; gene_name "Zm00001d027626"; ref_gene_id "Zm00001d027626";
1	StringTie	exon	9411005	9411066	1000	-	.	gene_id "MSTRG.352"; transcript_id "Zm00001d027626_T009"; exon_number "5"; gene_name "Zm00001d027626"; ref_gene_id "Zm00001d027626";
1	StringTie	exon	9411141	9411381	1000	-	.	gene_id "MSTRG.352"; transcript_id "Zm00001d027626_T009"; exon_number "6"; gene_name "Zm00001d027626"; ref_gene_id "Zm00001d027626";
1	StringTie	transcript	9488680	9489521	1000	+	.	gene_id "MSTRG.355"; transcript_id "Zm00001d027630_T005"; gene_name "Zm00001d027630"; ref_gene_id "Zm00001d027630";
1	StringTie	exon	9488680	9488737	1000	+	.	gene_id "MSTRG.355"; transcript_id "Zm00001d027630_T005"; exon_number "1"; gene_name "Zm00001d027630"; ref_gene_id "Zm00001d027630";
1	StringTie	exon	9488877	9488932	1000	+	.	gene_id "MSTRG.355"; transcript_id "Zm00001d027630_T005"; exon_number "2"; gene_name "Zm00001d027630"; ref_gene_id "Zm00001d027630";
1	StringTie	exon	9489057	9489140	1000	+	.	gene_id "MSTRG.355"; transcript_id "Zm00001d027630_T005"; exon_number "3"; gene_name "Zm00001d027630"; ref_gene_id "Zm00001d027630";
1	StringTie	exon	9489223	9489521	1000	+	.	gene_id "MSTRG.355"; transcript_id "Zm00001d027630_T005"; exon_number "4"; gene_name "Zm00001d027630"; ref_gene_id "Zm00001d027630";
1	StringTie	transcript	10108383	10109563	1000	+	.	gene_id "MSTRG.371"; transcript_id "Zm00001d027649_T009"; gene_name "Zm00001d027649"; ref_gene_id "Zm00001d027649";
1	StringTie	exon	10108383	10108526	1000	+	.	gene_id "MSTRG.371"; transcript_id "Zm00001d027649_T009"; exon_number "1"; gene_name "Zm00001d027649"; ref_gene_id "Zm00001d027649";
1	StringTie	exon	10109130	10109563	1000	+	.	gene_id "MSTRG.371"; transcript_id "Zm00001d027649_T009"; exon_number "2"; gene_name "Zm00001d027649"; ref_gene_id "Zm00001d027649";
1	StringTie	transcript	10108801	10109563	1000	+	.	gene_id "MSTRG.371"; transcript_id "Zm00001d027649_T007"; gene_name "Zm00001d027649"; ref_gene_id "Zm00001d027649";
1	StringTie	exon	10108801	10108864	1000	+	.	gene_id "MSTRG.371"; transcript_id "Zm00001d027649_T007"; exon_number "1"; gene_name "Zm00001d027649"; ref_gene_id "Zm00001d027649";
1	StringTie	exon	10108966	10109007	1000	+	.	gene_id "MSTRG.371"; transcript_id "Zm00001d027649_T007"; exon_number "2"; gene_name "Zm00001d027649"; ref_gene_id "Zm00001d027649";
1	StringTie	exon	10109128	10109563	1000	+	.	gene_id "MSTRG.371"; transcript_id "Zm00001d027649_T007"; exon_number "3"; gene_name "Zm00001d027649"; ref_gene_id "Zm00001d027649";
1	StringTie	transcript	10257911	10258752	1000	+	.	gene_id "MSTRG.375"; transcript_id "Zm00001d027655_T002"; gene_name "Zm00001d027655"; ref_gene_id "Zm00001d027655";
1	StringTie	exon	10257911	10257963	1000	+	.	gene_id "MSTRG.375"; transcript_id "Zm00001d027655_T002"; exon_number "1"; gene_name "Zm00001d027655"; ref_gene_id "Zm00001d027655";
1	StringTie	exon	10258064	10258124	1000	+	.	gene_id "MSTRG.375"; transcript_id "Zm00001d027655_T002"; exon_number "2"; gene_name "Zm00001d027655"; ref_gene_id "Zm00001d027655";
1	StringTie	exon	10258246	10258752	1000	+	.	gene_id "MSTRG.375"; transcript_id "Zm00001d027655_T002"; exon_number "3"; gene_name "Zm00001d027655"; ref_gene_id "Zm00001d027655";
1	StringTie	transcript	10572051	10572503	1000	+	.	gene_id "MSTRG.381"; transcript_id "Zm00001d027665_T023"; gene_name "Zm00001d027665"; ref_gene_id "Zm00001d027665";
1	StringTie	exon	10572051	10572503	1000	+	.	gene_id "MSTRG.381"; transcript_id "Zm00001d027665_T023"; exon_number "1"; gene_name "Zm00001d027665"; ref_gene_id "Zm00001d027665";
1	StringTie	transcript	10687584	10687926	1000	+	.	gene_id "MSTRG.390"; transcript_id "Zm00001d027672_T002"; gene_name "Zm00001d027672"; ref_gene_id "Zm00001d027672";
1	StringTie	exon	10687584	10687737	1000	+	.	gene_id "MSTRG.390"; transcript_id "Zm00001d027672_T002"; exon_number "1"; gene_name "Zm00001d027672"; ref_gene_id "Zm00001d027672";
1	StringTie	exon	10687840	10687926	1000	+	.	gene_id "MSTRG.390"; transcript_id "Zm00001d027672_T002"; exon_number "2"; gene_name "Zm00001d027672"; ref_gene_id "Zm00001d027672";
1	StringTie	transcript	10761186	10761297	1000	-	.	gene_id "MSTRG.393"; transcript_id "Zm00001d027675_T003"; gene_name "Zm00001d027675"; ref_gene_id "Zm00001d027675";
1	StringTie	exon	10761186	10761297	1000	-	.	gene_id "MSTRG.393"; transcript_id "Zm00001d027675_T003"; exon_number "1"; gene_name "Zm00001d027675"; ref_gene_id "Zm00001d027675";
1	StringTie	transcript	11011614	11011718	1000	-	.	gene_id "MSTRG.398"; transcript_id "Zm00001d027680_T001"; gene_name "Zm00001d027680"; ref_gene_id "Zm00001d027680";
1	StringTie	exon	11011614	11011718	1000	-	.	gene_id "MSTRG.398"; transcript_id "Zm00001d027680_T001"; exon_number "1"; gene_name "Zm00001d027680"; ref_gene_id "Zm00001d027680";
1	StringTie	transcript	11161451	11164971	1000	-	.	gene_id "MSTRG.406"; transcript_id "Zm00001d027688_T005"; gene_name "Zm00001d027688"; ref_gene_id "Zm00001d027688";
1	StringTie	exon	11161451	11161474	1000	-	.	gene_id "MSTRG.406"; transcript_id "Zm00001d027688_T005"; exon_number "1"; gene_name "Zm00001d027688"; ref_gene_id "Zm00001d027688";
1	StringTie	exon	11162027	11162107	1000	-	.	gene_id "MSTRG.406"; transcript_id "Zm00001d027688_T005"; exon_number "2"; gene_name "Zm00001d027688"; ref_gene_id "Zm00001d027688";
1	StringTie	exon	11164704	11164785	1000	-	.	gene_id "MSTRG.406"; transcript_id "Zm00001d027688_T005"; exon_number "3"; gene_name "Zm00001d027688"; ref_gene_id "Zm00001d027688";
1	StringTie	exon	11164906	11164971	1000	-	.	gene_id "MSTRG.406"; transcript_id "Zm00001d027688_T005"; exon_number "4"; gene_name "Zm00001d027688"; ref_gene_id "Zm00001d027688";
1	StringTie	transcript	11363905	11365100	1000	+	.	gene_id "MSTRG.414"; transcript_id "Zm00001d027699_T002"; gene_name "Zm00001d027699"; ref_gene_id "Zm00001d027699";
1	StringTie	exon	11363905	11363955	1000	+	.	gene_id "MSTRG.414"; transcript_id "Zm00001d027699_T002"; exon_number "1"; gene_name "Zm00001d027699"; ref_gene_id "Zm00001d027699";
1	StringTie	exon	11364046	11364118	1000	+	.	gene_id "MSTRG.414"; transcript_id "Zm00001d027699_T002"; exon_number "2"; gene_name "Zm00001d027699"; ref_gene_id "Zm00001d027699";
1	StringTie	exon	11364217	11365100	1000	+	.	gene_id "MSTRG.414"; transcript_id "Zm00001d027699_T002"; exon_number "3"; gene_name "Zm00001d027699"; ref_gene_id "Zm00001d027699";
1	StringTie	transcript	11589692	11590167	1000	+	.	gene_id "MSTRG.421"; transcript_id "Zm00001d027706_T003"; gene_name "Zm00001d027706"; ref_gene_id "Zm00001d027706";
1	StringTie	exon	11589692	11590167	1000	+	.	gene_id "MSTRG.421"; transcript_id "Zm00001d027706_T003"; exon_number "1"; gene_name "Zm00001d027706"; ref_gene_id "Zm00001d027706";
1	StringTie	transcript	11884572	11885983	1000	+	.	gene_id "MSTRG.428"; transcript_id "Zm00001d027714_T002"; gene_name "Zm00001d027714"; ref_gene_id "Zm00001d027714";
1	StringTie	exon	11884572	11885983	1000	+	.	gene_id "MSTRG.428"; transcript_id "Zm00001d027714_T002"; exon_number "1"; gene_name "Zm00001d027714"; ref_gene_id "Zm00001d027714";
1	StringTie	transcript	12375239	12375367	1000	+	.	gene_id "MSTRG.446"; transcript_id "Zm00001d027734_T006"; gene_name "Zm00001d027734"; ref_gene_id "Zm00001d027734";
1	StringTie	exon	12375239	12375367	1000	+	.	gene_id "MSTRG.446"; transcript_id "Zm00001d027734_T006"; exon_number "1"; gene_name "Zm00001d027734"; ref_gene_id "Zm00001d027734";
1	StringTie	transcript	12375239	12378539	1000	+	.	gene_id "MSTRG.446"; transcript_id "Zm00001d027734_T007"; gene_name "Zm00001d027734"; ref_gene_id "Zm00001d027734";
1	StringTie	exon	12375239	12375367	1000	+	.	gene_id "MSTRG.446"; transcript_id "Zm00001d027734_T007"; exon_number "1"; gene_name "Zm00001d027734"; ref_gene_id "Zm00001d027734";
1	StringTie	exon	12377893	12378539	1000	+	.	gene_id "MSTRG.446"; transcript_id "Zm00001d027734_T007"; exon_number "2"; gene_name "Zm00001d027734"; ref_gene_id "Zm00001d027734";
1	StringTie	transcript	12375239	12376147	1000	+	.	gene_id "MSTRG.446"; transcript_id "Zm00001d027734_T005"; gene_name "Zm00001d027734"; ref_gene_id "Zm00001d027734";
1	StringTie	exon	12375239	12375306	1000	+	.	gene_id "MSTRG.446"; transcript_id "Zm00001d027734_T005"; exon_number "1"; gene_name "Zm00001d027734"; ref_gene_id "Zm00001d027734";
1	StringTie	exon	12375451	12375553	1000	+	.	gene_id "MSTRG.446"; transcript_id "Zm00001d027734_T005"; exon_number "2"; gene_name "Zm00001d027734"; ref_gene_id "Zm00001d027734";
1	StringTie	exon	12375988	12376147	1000	+	.	gene_id "MSTRG.446"; transcript_id "Zm00001d027734_T005"; exon_number "3"; gene_name "Zm00001d027734"; ref_gene_id "Zm00001d027734";
1	StringTie	transcript	12714558	12716389	1000	+	.	gene_id "MSTRG.468"; transcript_id "Zm00001d027757_T001"; gene_name "HSF-transcription factor 13"; ref_gene_id "Zm00001d027757";
1	StringTie	exon	12714558	12714559	1000	+	.	gene_id "MSTRG.468"; transcript_id "Zm00001d027757_T001"; exon_number "1"; gene_name "HSF-transcription factor 13"; ref_gene_id "Zm00001d027757";
1	StringTie	exon	12715295	12716389	1000	+	.	gene_id "MSTRG.468"; transcript_id "Zm00001d027757_T001"; exon_number "2"; gene_name "HSF-transcription factor 13"; ref_gene_id "Zm00001d027757";
1	StringTie	transcript	13171803	13172794	1000	+	.	gene_id "MSTRG.480"; transcript_id "Zm00001d027768_T022"; gene_name "Zm00001d027768"; ref_gene_id "Zm00001d027768";
1	StringTie	exon	13171803	13172794	1000	+	.	gene_id "MSTRG.480"; transcript_id "Zm00001d027768_T022"; exon_number "1"; gene_name "Zm00001d027768"; ref_gene_id "Zm00001d027768";
1	StringTie	transcript	13172795	13172999	1000	+	.	gene_id "MSTRG.480"; transcript_id "Zm00001d027768_T016"; gene_name "Zm00001d027768"; ref_gene_id "Zm00001d027768";
1	StringTie	exon	13172795	13172999	1000	+	.	gene_id "MSTRG.480"; transcript_id "Zm00001d027768_T016"; exon_number "1"; gene_name "Zm00001d027768"; ref_gene_id "Zm00001d027768";
1	StringTie	transcript	13865965	13866101	1000	-	.	gene_id "MSTRG.501"; transcript_id "Zm00001d027802_T004"; gene_name "Homeobox-transcription factor 64"; ref_gene_id "Zm00001d027802";
1	StringTie	exon	13865965	13866101	1000	-	.	gene_id "MSTRG.501"; transcript_id "Zm00001d027802_T004"; exon_number "1"; gene_name "Homeobox-transcription factor 64"; ref_gene_id "Zm00001d027802";
1	StringTie	transcript	13865965	13866862	1000	-	.	gene_id "MSTRG.501"; transcript_id "Zm00001d027802_T001"; gene_name "Homeobox-transcription factor 64"; ref_gene_id "Zm00001d027802";
1	StringTie	exon	13865965	13866105	1000	-	.	gene_id "MSTRG.501"; transcript_id "Zm00001d027802_T001"; exon_number "1"; gene_name "Homeobox-transcription factor 64"; ref_gene_id "Zm00001d027802";
1	StringTie	exon	13866392	13866862	1000	-	.	gene_id "MSTRG.501"; transcript_id "Zm00001d027802_T001"; exon_number "2"; gene_name "Homeobox-transcription factor 64"; ref_gene_id "Zm00001d027802";
1	StringTie	transcript	14322571	14323311	1000	+	.	gene_id "MSTRG.512"; transcript_id "Zm00001d027813_T003"; gene_name "Zm00001d027813"; ref_gene_id "Zm00001d027813";
1	StringTie	exon	14322571	14323311	1000	+	.	gene_id "MSTRG.512"; transcript_id "Zm00001d027813_T003"; exon_number "1"; gene_name "Zm00001d027813"; ref_gene_id "Zm00001d027813";
1	StringTie	transcript	15121609	15123368	1000	-	.	gene_id "MSTRG.543"; transcript_id "Zm00001d027848_T017"; gene_name "Zm00001d027848"; ref_gene_id "Zm00001d027848";
1	StringTie	exon	15121609	15121723	1000	-	.	gene_id "MSTRG.543"; transcript_id "Zm00001d027848_T017"; exon_number "1"; gene_name "Zm00001d027848"; ref_gene_id "Zm00001d027848";
1	StringTie	exon	15121813	15121901	1000	-	.	gene_id "MSTRG.543"; transcript_id "Zm00001d027848_T017"; exon_number "2"; gene_name "Zm00001d027848"; ref_gene_id "Zm00001d027848";
1	StringTie	exon	15123099	15123368	1000	-	.	gene_id "MSTRG.543"; transcript_id "Zm00001d027848_T017"; exon_number "3"; gene_name "Zm00001d027848"; ref_gene_id "Zm00001d027848";
1	StringTie	transcript	15121809	15121901	1000	-	.	gene_id "MSTRG.543"; transcript_id "Zm00001d027848_T005"; gene_name "Zm00001d027848"; ref_gene_id "Zm00001d027848";
1	StringTie	exon	15121809	15121901	1000	-	.	gene_id "MSTRG.543"; transcript_id "Zm00001d027848_T005"; exon_number "1"; gene_name "Zm00001d027848"; ref_gene_id "Zm00001d027848";
1	StringTie	transcript	15123099	15123368	1000	-	.	gene_id "MSTRG.543"; transcript_id "Zm00001d027848_T013"; gene_name "Zm00001d027848"; ref_gene_id "Zm00001d027848";
1	StringTie	exon	15123099	15123368	1000	-	.	gene_id "MSTRG.543"; transcript_id "Zm00001d027848_T013"; exon_number "1"; gene_name "Zm00001d027848"; ref_gene_id "Zm00001d027848";
1	StringTie	transcript	15175578	15176314	1000	-	.	gene_id "MSTRG.546"; transcript_id "Zm00001d022678_T001"; gene_name "Zm00001d022678"; ref_gene_id "Zm00001d022678";
1	StringTie	exon	15175578	15176314	1000	-	.	gene_id "MSTRG.546"; transcript_id "Zm00001d022678_T001"; exon_number "1"; gene_name "Zm00001d022678"; ref_gene_id "Zm00001d022678";
1	StringTie	transcript	15365971	15366843	1000	-	.	gene_id "MSTRG.551"; transcript_id "Zm00001d027855_T001"; gene_name "bHLH-transcription factor 74"; ref_gene_id "Zm00001d027855";
1	StringTie	exon	15365971	15366123	1000	-	.	gene_id "MSTRG.551"; transcript_id "Zm00001d027855_T001"; exon_number "1"; gene_name "bHLH-transcription factor 74"; ref_gene_id "Zm00001d027855";
1	StringTie	exon	15366529	15366843	1000	-	.	gene_id "MSTRG.551"; transcript_id "Zm00001d027855_T001"; exon_number "2"; gene_name "bHLH-transcription factor 74"; ref_gene_id "Zm00001d027855";
1	StringTie	transcript	15971349	15972497	1000	+	.	gene_id "MSTRG.565"; transcript_id "Zm00001d027869_T006"; gene_name "Zm00001d027869"; ref_gene_id "Zm00001d027869";
1	StringTie	exon	15971349	15971472	1000	+	.	gene_id "MSTRG.565"; transcript_id "Zm00001d027869_T006"; exon_number "1"; gene_name "Zm00001d027869"; ref_gene_id "Zm00001d027869";
1	StringTie	exon	15972133	15972497	1000	+	.	gene_id "MSTRG.565"; transcript_id "Zm00001d027869_T006"; exon_number "2"; gene_name "Zm00001d027869"; ref_gene_id "Zm00001d027869";
1	StringTie	transcript	16016815	16017413	1000	+	.	gene_id "MSTRG.568"; transcript_id "Zm00001d027872_T009"; gene_name "Zm00001d027872"; ref_gene_id "Zm00001d027872";
1	StringTie	exon	16016815	16017413	1000	+	.	gene_id "MSTRG.568"; transcript_id "Zm00001d027872_T009"; exon_number "1"; gene_name "Zm00001d027872"; ref_gene_id "Zm00001d027872";
1	StringTie	transcript	16039055	16039279	1000	-	.	gene_id "MSTRG.570"; transcript_id "Zm00001d027874_T004"; gene_name "nuclear transcription factor y subunit a1"; ref_gene_id "Zm00001d027874";
1	StringTie	exon	16039055	16039279	1000	-	.	gene_id "MSTRG.570"; transcript_id "Zm00001d027874_T004"; exon_number "1"; gene_name "nuclear transcription factor y subunit a1"; ref_gene_id "Zm00001d027874";
1	StringTie	transcript	16040887	16042002	1000	-	.	gene_id "MSTRG.570"; transcript_id "Zm00001d027874_T009"; gene_name "nuclear transcription factor y subunit a1"; ref_gene_id "Zm00001d027874";
1	StringTie	exon	16040887	16040909	1000	-	.	gene_id "MSTRG.570"; transcript_id "Zm00001d027874_T009"; exon_number "1"; gene_name "nuclear transcription factor y subunit a1"; ref_gene_id "Zm00001d027874";
1	StringTie	exon	16041778	16042002	1000	-	.	gene_id "MSTRG.570"; transcript_id "Zm00001d027874_T009"; exon_number "2"; gene_name "nuclear transcription factor y subunit a1"; ref_gene_id "Zm00001d027874";
1	StringTie	transcript	16231394	16232369	1000	+	.	gene_id "MSTRG.572"; transcript_id "Zm00001d027876_T005"; gene_name "Zm00001d027876"; ref_gene_id "Zm00001d027876";
1	StringTie	exon	16231394	16232369	1000	+	.	gene_id "MSTRG.572"; transcript_id "Zm00001d027876_T005"; exon_number "1"; gene_name "Zm00001d027876"; ref_gene_id "Zm00001d027876";
1	StringTie	transcript	16710700	16712601	1000	-	.	gene_id "MSTRG.581"; transcript_id "Zm00001d027884_T005"; gene_name "Zm00001d027884"; ref_gene_id "Zm00001d027884";
1	StringTie	exon	16710700	16710711	1000	-	.	gene_id "MSTRG.581"; transcript_id "Zm00001d027884_T005"; exon_number "1"; gene_name "Zm00001d027884"; ref_gene_id "Zm00001d027884";
1	StringTie	exon	16712491	16712601	1000	-	.	gene_id "MSTRG.581"; transcript_id "Zm00001d027884_T005"; exon_number "2"; gene_name "Zm00001d027884"; ref_gene_id "Zm00001d027884";
1	StringTie	transcript	16722248	16722692	1000	+	.	gene_id "MSTRG.582"; transcript_id "Zm00001d027885_T002"; gene_name "Zm00001d027885"; ref_gene_id "Zm00001d027885";
1	StringTie	exon	16722248	16722692	1000	+	.	gene_id "MSTRG.582"; transcript_id "Zm00001d027885_T002"; exon_number "1"; gene_name "Zm00001d027885"; ref_gene_id "Zm00001d027885";
1	StringTie	transcript	16973101	16977186	1000	+	.	gene_id "MSTRG.593"; transcript_id "Zm00001d027895_T015"; gene_name "Zm00001d027895"; ref_gene_id "Zm00001d027895";
1	StringTie	exon	16973101	16973133	1000	+	.	gene_id "MSTRG.593"; transcript_id "Zm00001d027895_T015"; exon_number "1"; gene_name "Zm00001d027895"; ref_gene_id "Zm00001d027895";
1	StringTie	exon	16975524	16975588	1000	+	.	gene_id "MSTRG.593"; transcript_id "Zm00001d027895_T015"; exon_number "2"; gene_name "Zm00001d027895"; ref_gene_id "Zm00001d027895";
1	StringTie	exon	16976428	16976578	1000	+	.	gene_id "MSTRG.593"; transcript_id "Zm00001d027895_T015"; exon_number "3"; gene_name "Zm00001d027895"; ref_gene_id "Zm00001d027895";
1	StringTie	exon	16976669	16977186	1000	+	.	gene_id "MSTRG.593"; transcript_id "Zm00001d027895_T015"; exon_number "4"; gene_name "Zm00001d027895"; ref_gene_id "Zm00001d027895";
1	StringTie	transcript	16976510	16977186	1000	+	.	gene_id "MSTRG.593"; transcript_id "Zm00001d027895_T025"; gene_name "Zm00001d027895"; ref_gene_id "Zm00001d027895";
1	StringTie	exon	16976510	16977186	1000	+	.	gene_id "MSTRG.593"; transcript_id "Zm00001d027895_T025"; exon_number "1"; gene_name "Zm00001d027895"; ref_gene_id "Zm00001d027895";
1	StringTie	transcript	17536296	17536710	1000	+	.	gene_id "MSTRG.612"; transcript_id "Zm00001d027916_T011"; gene_name "Zm00001d027916"; ref_gene_id "Zm00001d027916";
1	StringTie	exon	17536296	17536710	1000	+	.	gene_id "MSTRG.612"; transcript_id "Zm00001d027916_T011"; exon_number "1"; gene_name "Zm00001d027916"; ref_gene_id "Zm00001d027916";
1	StringTie	transcript	17724900	17726155	1000	-	.	gene_id "MSTRG.617"; transcript_id "Zm00001d027922_T003"; gene_name "Zm00001d027922"; ref_gene_id "Zm00001d027922";
1	StringTie	exon	17724900	17724968	1000	-	.	gene_id "MSTRG.617"; transcript_id "Zm00001d027922_T003"; exon_number "1"; gene_name "Zm00001d027922"; ref_gene_id "Zm00001d027922";
1	StringTie	exon	17725068	17725118	1000	-	.	gene_id "MSTRG.617"; transcript_id "Zm00001d027922_T003"; exon_number "2"; gene_name "Zm00001d027922"; ref_gene_id "Zm00001d027922";
1	StringTie	exon	17725212	17725268	1000	-	.	gene_id "MSTRG.617"; transcript_id "Zm00001d027922_T003"; exon_number "3"; gene_name "Zm00001d027922"; ref_gene_id "Zm00001d027922";
1	StringTie	exon	17725899	17726155	1000	-	.	gene_id "MSTRG.617"; transcript_id "Zm00001d027922_T003"; exon_number "4"; gene_name "Zm00001d027922"; ref_gene_id "Zm00001d027922";
1	StringTie	transcript	17807571	17808643	1000	-	.	gene_id "MSTRG.619"; transcript_id "Zm00001d027925_T002"; gene_name "AP2-EREBP-transcription factor 180"; ref_gene_id "Zm00001d027925";
1	StringTie	exon	17807571	17807681	1000	-	.	gene_id "MSTRG.619"; transcript_id "Zm00001d027925_T002"; exon_number "1"; gene_name "AP2-EREBP-transcription factor 180"; ref_gene_id "Zm00001d027925";
1	StringTie	exon	17808387	17808643	1000	-	.	gene_id "MSTRG.619"; transcript_id "Zm00001d027925_T002"; exon_number "2"; gene_name "AP2-EREBP-transcription factor 180"; ref_gene_id "Zm00001d027925";
1	StringTie	transcript	17958810	17960175	1000	+	.	gene_id "MSTRG.628"; transcript_id "Zm00001d027934_T005"; gene_name "leucine-rich transmembrane protein kinase1"; ref_gene_id "Zm00001d027934";
1	StringTie	exon	17958810	17960175	1000	+	.	gene_id "MSTRG.628"; transcript_id "Zm00001d027934_T005"; exon_number "1"; gene_name "leucine-rich transmembrane protein kinase1"; ref_gene_id "Zm00001d027934";
1	StringTie	transcript	18045492	18045601	1000	+	.	gene_id "MSTRG.637"; transcript_id "Zm00001d027943_T022"; gene_name "Zm00001d027943"; ref_gene_id "Zm00001d027943";
1	StringTie	exon	18045492	18045601	1000	+	.	gene_id "MSTRG.637"; transcript_id "Zm00001d027943_T022"; exon_number "1"; gene_name "Zm00001d027943"; ref_gene_id "Zm00001d027943";
1	StringTie	transcript	18189343	18190288	1000	+	.	gene_id "MSTRG.644"; transcript_id "Zm00001d027950_T003"; gene_name "Zm00001d027950"; ref_gene_id "Zm00001d027950";
1	StringTie	exon	18189343	18189518	1000	+	.	gene_id "MSTRG.644"; transcript_id "Zm00001d027950_T003"; exon_number "1"; gene_name "Zm00001d027950"; ref_gene_id "Zm00001d027950";
1	StringTie	exon	18189655	18189709	1000	+	.	gene_id "MSTRG.644"; transcript_id "Zm00001d027950_T003"; exon_number "2"; gene_name "Zm00001d027950"; ref_gene_id "Zm00001d027950";
1	StringTie	exon	18189798	18190288	1000	+	.	gene_id "MSTRG.644"; transcript_id "Zm00001d027950_T003"; exon_number "3"; gene_name "Zm00001d027950"; ref_gene_id "Zm00001d027950";
1	StringTie	transcript	18601289	18601530	1000	+	.	gene_id "MSTRG.659"; transcript_id "Zm00001d027969_T007"; gene_name "Zm00001d027969"; ref_gene_id "Zm00001d027969";
1	StringTie	exon	18601289	18601376	1000	+	.	gene_id "MSTRG.659"; transcript_id "Zm00001d027969_T007"; exon_number "1"; gene_name "Zm00001d027969"; ref_gene_id "Zm00001d027969";
1	StringTie	exon	18601517	18601530	1000	+	.	gene_id "MSTRG.659"; transcript_id "Zm00001d027969_T007"; exon_number "2"; gene_name "Zm00001d027969"; ref_gene_id "Zm00001d027969";
1	StringTie	transcript	18908118	18908326	1000	+	.	gene_id "MSTRG.661"; transcript_id "Zm00001d027973_T001"; gene_name "Zm00001d027973"; ref_gene_id "Zm00001d027973";
1	StringTie	exon	18908118	18908326	1000	+	.	gene_id "MSTRG.661"; transcript_id "Zm00001d027973_T001"; exon_number "1"; gene_name "Zm00001d027973"; ref_gene_id "Zm00001d027973";
1	StringTie	transcript	19318894	19319926	1000	+	.	gene_id "MSTRG.671"; transcript_id "Zm00001d027982_T005"; gene_name "Zm00001d027982"; ref_gene_id "Zm00001d027982";
1	StringTie	exon	19318894	19318983	1000	+	.	gene_id "MSTRG.671"; transcript_id "Zm00001d027982_T005"; exon_number "1"; gene_name "Zm00001d027982"; ref_gene_id "Zm00001d027982";
1	StringTie	exon	19319124	19319210	1000	+	.	gene_id "MSTRG.671"; transcript_id "Zm00001d027982_T005"; exon_number "2"; gene_name "Zm00001d027982"; ref_gene_id "Zm00001d027982";
1	StringTie	exon	19319367	19319926	1000	+	.	gene_id "MSTRG.671"; transcript_id "Zm00001d027982_T005"; exon_number "3"; gene_name "Zm00001d027982"; ref_gene_id "Zm00001d027982";
1	StringTie	transcript	19701700	19702323	1000	-	.	gene_id "MSTRG.684"; transcript_id "Zm00001d027996_T003"; gene_name "Zm00001d027996"; ref_gene_id "Zm00001d027996";
1	StringTie	exon	19701700	19701768	1000	-	.	gene_id "MSTRG.684"; transcript_id "Zm00001d027996_T003"; exon_number "1"; gene_name "Zm00001d027996"; ref_gene_id "Zm00001d027996";
1	StringTie	exon	19701925	19702061	1000	-	.	gene_id "MSTRG.684"; transcript_id "Zm00001d027996_T003"; exon_number "2"; gene_name "Zm00001d027996"; ref_gene_id "Zm00001d027996";
1	StringTie	exon	19702204	19702323	1000	-	.	gene_id "MSTRG.684"; transcript_id "Zm00001d027996_T003"; exon_number "3"; gene_name "Zm00001d027996"; ref_gene_id "Zm00001d027996";
1	StringTie	transcript	20265521	20265983	1000	-	.	gene_id "MSTRG.698"; transcript_id "Zm00001d028010_T005"; gene_name "Zm00001d028010"; ref_gene_id "Zm00001d028010";
1	StringTie	exon	20265521	20265583	1000	-	.	gene_id "MSTRG.698"; transcript_id "Zm00001d028010_T005"; exon_number "1"; gene_name "Zm00001d028010"; ref_gene_id "Zm00001d028010";
1	StringTie	exon	20265656	20265983	1000	-	.	gene_id "MSTRG.698"; transcript_id "Zm00001d028010_T005"; exon_number "2"; gene_name "Zm00001d028010"; ref_gene_id "Zm00001d028010";
1	StringTie	transcript	20265521	20265803	1000	-	.	gene_id "MSTRG.698"; transcript_id "Zm00001d028010_T004"; gene_name "Zm00001d028010"; ref_gene_id "Zm00001d028010";
1	StringTie	exon	20265521	20265592	1000	-	.	gene_id "MSTRG.698"; transcript_id "Zm00001d028010_T004"; exon_number "1"; gene_name "Zm00001d028010"; ref_gene_id "Zm00001d028010";
1	StringTie	exon	20265701	20265803	1000	-	.	gene_id "MSTRG.698"; transcript_id "Zm00001d028010_T004"; exon_number "2"; gene_name "Zm00001d028010"; ref_gene_id "Zm00001d028010";
1	StringTie	transcript	20933626	20933984	1000	+	.	gene_id "MSTRG.720"; transcript_id "Zm00001d028034_T036"; gene_name "Zm00001d028034"; ref_gene_id "Zm00001d028034";
1	StringTie	exon	20933626	20933781	1000	+	.	gene_id "MSTRG.720"; transcript_id "Zm00001d028034_T036"; exon_number "1"; gene_name "Zm00001d028034"; ref_gene_id "Zm00001d028034";
1	StringTie	exon	20933903	20933984	1000	+	.	gene_id "MSTRG.720"; transcript_id "Zm00001d028034_T036"; exon_number "2"; gene_name "Zm00001d028034"; ref_gene_id "Zm00001d028034";
1	StringTie	transcript	21198335	21200544	1000	+	.	gene_id "MSTRG.725"; transcript_id "Zm00001d028038_T009"; gene_name "Zm00001d028038"; ref_gene_id "Zm00001d028038";
1	StringTie	exon	21198335	21198517	1000	+	.	gene_id "MSTRG.725"; transcript_id "Zm00001d028038_T009"; exon_number "1"; gene_name "Zm00001d028038"; ref_gene_id "Zm00001d028038";
1	StringTie	exon	21199815	21199919	1000	+	.	gene_id "MSTRG.725"; transcript_id "Zm00001d028038_T009"; exon_number "2"; gene_name "Zm00001d028038"; ref_gene_id "Zm00001d028038";
1	StringTie	exon	21200084	21200544	1000	+	.	gene_id "MSTRG.725"; transcript_id "Zm00001d028038_T009"; exon_number "3"; gene_name "Zm00001d028038"; ref_gene_id "Zm00001d028038";
1	StringTie	transcript	21198396	21199150	1000	+	.	gene_id "MSTRG.725"; transcript_id "Zm00001d028038_T007"; gene_name "Zm00001d028038"; ref_gene_id "Zm00001d028038";
1	StringTie	exon	21198396	21198405	1000	+	.	gene_id "MSTRG.725"; transcript_id "Zm00001d028038_T007"; exon_number "1"; gene_name "Zm00001d028038"; ref_gene_id "Zm00001d028038";
1	StringTie	exon	21198660	21199150	1000	+	.	gene_id "MSTRG.725"; transcript_id "Zm00001d028038_T007"; exon_number "2"; gene_name "Zm00001d028038"; ref_gene_id "Zm00001d028038";
1	StringTie	transcript	21199815	21200544	1000	+	.	gene_id "MSTRG.725"; transcript_id "Zm00001d028038_T005"; gene_name "Zm00001d028038"; ref_gene_id "Zm00001d028038";
1	StringTie	exon	21199815	21199919	1000	+	.	gene_id "MSTRG.725"; transcript_id "Zm00001d028038_T005"; exon_number "1"; gene_name "Zm00001d028038"; ref_gene_id "Zm00001d028038";
1	StringTie	exon	21200084	21200544	1000	+	.	gene_id "MSTRG.725"; transcript_id "Zm00001d028038_T005"; exon_number "2"; gene_name "Zm00001d028038"; ref_gene_id "Zm00001d028038";
1	StringTie	transcript	21288450	21289662	1000	+	.	gene_id "MSTRG.726"; transcript_id "Zm00001d028039_T006"; gene_name "Zm00001d028039"; ref_gene_id "Zm00001d028039";
1	StringTie	exon	21288450	21288479	1000	+	.	gene_id "MSTRG.726"; transcript_id "Zm00001d028039_T006"; exon_number "1"; gene_name "Zm00001d028039"; ref_gene_id "Zm00001d028039";
1	StringTie	exon	21289263	21289331	1000	+	.	gene_id "MSTRG.726"; transcript_id "Zm00001d028039_T006"; exon_number "2"; gene_name "Zm00001d028039"; ref_gene_id "Zm00001d028039";
1	StringTie	exon	21289432	21289662	1000	+	.	gene_id "MSTRG.726"; transcript_id "Zm00001d028039_T006"; exon_number "3"; gene_name "Zm00001d028039"; ref_gene_id "Zm00001d028039";
1	StringTie	transcript	21289709	21290046	1000	+	.	gene_id "MSTRG.726"; transcript_id "Zm00001d028039_T003"; gene_name "Zm00001d028039"; ref_gene_id "Zm00001d028039";
1	StringTie	exon	21289709	21289831	1000	+	.	gene_id "MSTRG.726"; transcript_id "Zm00001d028039_T003"; exon_number "1"; gene_name "Zm00001d028039"; ref_gene_id "Zm00001d028039";
1	StringTie	exon	21289934	21290046	1000	+	.	gene_id "MSTRG.726"; transcript_id "Zm00001d028039_T003"; exon_number "2"; gene_name "Zm00001d028039"; ref_gene_id "Zm00001d028039";
1	StringTie	transcript	21294291	21294780	1000	-	.	gene_id "MSTRG.727"; transcript_id "Zm00001d028040_T004"; gene_name "Zm00001d028040"; ref_gene_id "Zm00001d028040";
1	StringTie	exon	21294291	21294329	1000	-	.	gene_id "MSTRG.727"; transcript_id "Zm00001d028040_T004"; exon_number "1"; gene_name "Zm00001d028040"; ref_gene_id "Zm00001d028040";
1	StringTie	exon	21294430	21294511	1000	-	.	gene_id "MSTRG.727"; transcript_id "Zm00001d028040_T004"; exon_number "2"; gene_name "Zm00001d028040"; ref_gene_id "Zm00001d028040";
1	StringTie	exon	21294683	21294780	1000	-	.	gene_id "MSTRG.727"; transcript_id "Zm00001d028040_T004"; exon_number "3"; gene_name "Zm00001d028040"; ref_gene_id "Zm00001d028040";
1	StringTie	transcript	21525107	21527021	1000	+	.	gene_id "MSTRG.730"; transcript_id "Zm00001d028045_T014"; gene_name "Zm00001d028045"; ref_gene_id "Zm00001d028045";
1	StringTie	exon	21525107	21525109	1000	+	.	gene_id "MSTRG.730"; transcript_id "Zm00001d028045_T014"; exon_number "1"; gene_name "Zm00001d028045"; ref_gene_id "Zm00001d028045";
1	StringTie	exon	21525205	21525273	1000	+	.	gene_id "MSTRG.730"; transcript_id "Zm00001d028045_T014"; exon_number "2"; gene_name "Zm00001d028045"; ref_gene_id "Zm00001d028045";
1	StringTie	exon	21526451	21526493	1000	+	.	gene_id "MSTRG.730"; transcript_id "Zm00001d028045_T014"; exon_number "3"; gene_name "Zm00001d028045"; ref_gene_id "Zm00001d028045";
1	StringTie	exon	21526586	21527021	1000	+	.	gene_id "MSTRG.730"; transcript_id "Zm00001d028045_T014"; exon_number "4"; gene_name "Zm00001d028045"; ref_gene_id "Zm00001d028045";
1	StringTie	transcript	21883968	21884689	1000	+	.	gene_id "MSTRG.745"; transcript_id "Zm00001d028064_T001"; gene_name "Zm00001d028064"; ref_gene_id "Zm00001d028064";
1	StringTie	exon	21883968	21884052	1000	+	.	gene_id "MSTRG.745"; transcript_id "Zm00001d028064_T001"; exon_number "1"; gene_name "Zm00001d028064"; ref_gene_id "Zm00001d028064";
1	StringTie	exon	21884166	21884689	1000	+	.	gene_id "MSTRG.745"; transcript_id "Zm00001d028064_T001"; exon_number "2"; gene_name "Zm00001d028064"; ref_gene_id "Zm00001d028064";
1	StringTie	transcript	21979358	21981292	1000	+	.	gene_id "MSTRG.750"; transcript_id "Zm00001d028071_T003"; gene_name "Zm00001d028071"; ref_gene_id "Zm00001d028071";
1	StringTie	exon	21979358	21979603	1000	+	.	gene_id "MSTRG.750"; transcript_id "Zm00001d028071_T003"; exon_number "1"; gene_name "Zm00001d028071"; ref_gene_id "Zm00001d028071";
1	StringTie	exon	21979692	21979718	1000	+	.	gene_id "MSTRG.750"; transcript_id "Zm00001d028071_T003"; exon_number "2"; gene_name "Zm00001d028071"; ref_gene_id "Zm00001d028071";
1	StringTie	exon	21979990	21980037	1000	+	.	gene_id "MSTRG.750"; transcript_id "Zm00001d028071_T003"; exon_number "3"; gene_name "Zm00001d028071"; ref_gene_id "Zm00001d028071";
1	StringTie	exon	21980604	21981292	1000	+	.	gene_id "MSTRG.750"; transcript_id "Zm00001d028071_T003"; exon_number "4"; gene_name "Zm00001d028071"; ref_gene_id "Zm00001d028071";
1	StringTie	transcript	21999972	22000229	1000	+	.	gene_id "MSTRG.752"; transcript_id "Zm00001d028073_T005"; gene_name "Zm00001d028073"; ref_gene_id "Zm00001d028073";
1	StringTie	exon	21999972	22000229	1000	+	.	gene_id "MSTRG.752"; transcript_id "Zm00001d028073_T005"; exon_number "1"; gene_name "Zm00001d028073"; ref_gene_id "Zm00001d028073";
1	StringTie	transcript	21999972	22006881	1000	+	.	gene_id "MSTRG.752"; transcript_id "Zm00001d028073_T007"; gene_name "Zm00001d028073"; ref_gene_id "Zm00001d028073";
1	StringTie	exon	21999972	22000229	1000	+	.	gene_id "MSTRG.752"; transcript_id "Zm00001d028073_T007"; exon_number "1"; gene_name "Zm00001d028073"; ref_gene_id "Zm00001d028073";
1	StringTie	exon	22006222	22006272	1000	+	.	gene_id "MSTRG.752"; transcript_id "Zm00001d028073_T007"; exon_number "2"; gene_name "Zm00001d028073"; ref_gene_id "Zm00001d028073";
1	StringTie	exon	22006367	22006881	1000	+	.	gene_id "MSTRG.752"; transcript_id "Zm00001d028073_T007"; exon_number "3"; gene_name "Zm00001d028073"; ref_gene_id "Zm00001d028073";
1	StringTie	transcript	22003337	22006881	1000	+	.	gene_id "MSTRG.752"; transcript_id "Zm00001d028073_T009"; gene_name "Zm00001d028073"; ref_gene_id "Zm00001d028073";
1	StringTie	exon	22003337	22003369	1000	+	.	gene_id "MSTRG.752"; transcript_id "Zm00001d028073_T009"; exon_number "1"; gene_name "Zm00001d028073"; ref_gene_id "Zm00001d028073";
1	StringTie	exon	22006165	22006272	1000	+	.	gene_id "MSTRG.752"; transcript_id "Zm00001d028073_T009"; exon_number "2"; gene_name "Zm00001d028073"; ref_gene_id "Zm00001d028073";
1	StringTie	exon	22006367	22006881	1000	+	.	gene_id "MSTRG.752"; transcript_id "Zm00001d028073_T009"; exon_number "3"; gene_name "Zm00001d028073"; ref_gene_id "Zm00001d028073";
1	StringTie	transcript	22053956	22054108	1000	-	.	gene_id "MSTRG.755"; transcript_id "Zm00001d028075_T026"; gene_name "Zm00001d028075"; ref_gene_id "Zm00001d028075";
1	StringTie	exon	22053956	22054108	1000	-	.	gene_id "MSTRG.755"; transcript_id "Zm00001d028075_T026"; exon_number "1"; gene_name "Zm00001d028075"; ref_gene_id "Zm00001d028075";
1	StringTie	transcript	22053956	22054125	1000	-	.	gene_id "MSTRG.755"; transcript_id "Zm00001d028075_T024"; gene_name "Zm00001d028075"; ref_gene_id "Zm00001d028075";
1	StringTie	exon	22053956	22054125	1000	-	.	gene_id "MSTRG.755"; transcript_id "Zm00001d028075_T024"; exon_number "1"; gene_name "Zm00001d028075"; ref_gene_id "Zm00001d028075";
1	StringTie	transcript	22057172	22057455	1000	-	.	gene_id "MSTRG.755"; transcript_id "Zm00001d028075_T012"; gene_name "Zm00001d028075"; ref_gene_id "Zm00001d028075";
1	StringTie	exon	22057172	22057235	1000	-	.	gene_id "MSTRG.755"; transcript_id "Zm00001d028075_T012"; exon_number "1"; gene_name "Zm00001d028075"; ref_gene_id "Zm00001d028075";
1	StringTie	exon	22057355	22057455	1000	-	.	gene_id "MSTRG.755"; transcript_id "Zm00001d028075_T012"; exon_number "2"; gene_name "Zm00001d028075"; ref_gene_id "Zm00001d028075";
1	StringTie	transcript	22057351	22057455	1000	-	.	gene_id "MSTRG.755"; transcript_id "Zm00001d028075_T034"; gene_name "Zm00001d028075"; ref_gene_id "Zm00001d028075";
1	StringTie	exon	22057351	22057455	1000	-	.	gene_id "MSTRG.755"; transcript_id "Zm00001d028075_T034"; exon_number "1"; gene_name "Zm00001d028075"; ref_gene_id "Zm00001d028075";
1	StringTie	transcript	22372239	22372909	1000	+	.	gene_id "MSTRG.764"; transcript_id "Zm00001d022692_T001"; gene_name "Zm00001d022692"; ref_gene_id "Zm00001d022692";
1	StringTie	exon	22372239	22372246	1000	+	.	gene_id "MSTRG.764"; transcript_id "Zm00001d022692_T001"; exon_number "1"; gene_name "Zm00001d022692"; ref_gene_id "Zm00001d022692";
1	StringTie	exon	22372580	22372909	1000	+	.	gene_id "MSTRG.764"; transcript_id "Zm00001d022692_T001"; exon_number "2"; gene_name "Zm00001d022692"; ref_gene_id "Zm00001d022692";
1	StringTie	transcript	22890944	22891698	1000	-	.	gene_id "MSTRG.775"; transcript_id "Zm00001d028096_T012"; gene_name "Zm00001d028096"; ref_gene_id "Zm00001d028096";
1	StringTie	exon	22890944	22890998	1000	-	.	gene_id "MSTRG.775"; transcript_id "Zm00001d028096_T012"; exon_number "1"; gene_name "Zm00001d028096"; ref_gene_id "Zm00001d028096";
1	StringTie	exon	22891378	22891698	1000	-	.	gene_id "MSTRG.775"; transcript_id "Zm00001d028096_T012"; exon_number "2"; gene_name "Zm00001d028096"; ref_gene_id "Zm00001d028096";
1	StringTie	transcript	22971443	22971879	1000	+	.	gene_id "MSTRG.777"; transcript_id "Zm00001d028098_T002"; gene_name "Zm00001d028098"; ref_gene_id "Zm00001d028098";
1	StringTie	exon	22971443	22971879	1000	+	.	gene_id "MSTRG.777"; transcript_id "Zm00001d028098_T002"; exon_number "1"; gene_name "Zm00001d028098"; ref_gene_id "Zm00001d028098";
1	StringTie	transcript	23022368	23022873	1000	-	.	gene_id "MSTRG.781"; transcript_id "Zm00001d028104_T001"; gene_name "Zm00001d028104"; ref_gene_id "Zm00001d028104";
1	StringTie	exon	23022368	23022482	1000	-	.	gene_id "MSTRG.781"; transcript_id "Zm00001d028104_T001"; exon_number "1"; gene_name "Zm00001d028104"; ref_gene_id "Zm00001d028104";
1	StringTie	exon	23022577	23022873	1000	-	.	gene_id "MSTRG.781"; transcript_id "Zm00001d028104_T001"; exon_number "2"; gene_name "Zm00001d028104"; ref_gene_id "Zm00001d028104";
1	StringTie	transcript	23110672	23111507	1000	+	.	gene_id "MSTRG.785"; transcript_id "Zm00001d028109_T001"; gene_name "Zm00001d028109"; ref_gene_id "Zm00001d028109";
1	StringTie	exon	23110672	23110773	1000	+	.	gene_id "MSTRG.785"; transcript_id "Zm00001d028109_T001"; exon_number "1"; gene_name "Zm00001d028109"; ref_gene_id "Zm00001d028109";
1	StringTie	exon	23111071	23111171	1000	+	.	gene_id "MSTRG.785"; transcript_id "Zm00001d028109_T001"; exon_number "2"; gene_name "Zm00001d028109"; ref_gene_id "Zm00001d028109";
1	StringTie	exon	23111277	23111507	1000	+	.	gene_id "MSTRG.785"; transcript_id "Zm00001d028109_T001"; exon_number "3"; gene_name "Zm00001d028109"; ref_gene_id "Zm00001d028109";
1	StringTie	transcript	23121888	23122921	1000	-	.	gene_id "MSTRG.787"; transcript_id "Zm00001d028111_T005"; gene_name "Zm00001d028111"; ref_gene_id "Zm00001d028111";
1	StringTie	exon	23121888	23122058	1000	-	.	gene_id "MSTRG.787"; transcript_id "Zm00001d028111_T005"; exon_number "1"; gene_name "Zm00001d028111"; ref_gene_id "Zm00001d028111";
1	StringTie	exon	23122677	23122921	1000	-	.	gene_id "MSTRG.787"; transcript_id "Zm00001d028111_T005"; exon_number "2"; gene_name "Zm00001d028111"; ref_gene_id "Zm00001d028111";
1	StringTie	transcript	23324938	23325398	1000	-	.	gene_id "MSTRG.792"; transcript_id "Zm00001d028117_T004"; gene_name "Zm00001d028117"; ref_gene_id "Zm00001d028117";
1	StringTie	exon	23324938	23325133	1000	-	.	gene_id "MSTRG.792"; transcript_id "Zm00001d028117_T004"; exon_number "1"; gene_name "Zm00001d028117"; ref_gene_id "Zm00001d028117";
1	StringTie	exon	23325245	23325398	1000	-	.	gene_id "MSTRG.792"; transcript_id "Zm00001d028117_T004"; exon_number "2"; gene_name "Zm00001d028117"; ref_gene_id "Zm00001d028117";
1	StringTie	transcript	23626047	23627370	1000	+	.	gene_id "MSTRG.804"; transcript_id "Zm00001d028129_T004"; gene_name "grassy tillers1"; ref_gene_id "Zm00001d028129";
1	StringTie	exon	23626047	23626131	1000	+	.	gene_id "MSTRG.804"; transcript_id "Zm00001d028129_T004"; exon_number "1"; gene_name "grassy tillers1"; ref_gene_id "Zm00001d028129";
1	StringTie	exon	23626244	23626277	1000	+	.	gene_id "MSTRG.804"; transcript_id "Zm00001d028129_T004"; exon_number "2"; gene_name "grassy tillers1"; ref_gene_id "Zm00001d028129";
1	StringTie	exon	23626819	23627370	1000	+	.	gene_id "MSTRG.804"; transcript_id "Zm00001d028129_T004"; exon_number "3"; gene_name "grassy tillers1"; ref_gene_id "Zm00001d028129";
1	StringTie	transcript	23626047	23627370	1000	+	.	gene_id "MSTRG.804"; transcript_id "Zm00001d028129_T001"; gene_name "grassy tillers1"; ref_gene_id "Zm00001d028129";
1	StringTie	exon	23626047	23626131	1000	+	.	gene_id "MSTRG.804"; transcript_id "Zm00001d028129_T001"; exon_number "1"; gene_name "grassy tillers1"; ref_gene_id "Zm00001d028129";
1	StringTie	exon	23626770	23626801	1000	+	.	gene_id "MSTRG.804"; transcript_id "Zm00001d028129_T001"; exon_number "2"; gene_name "grassy tillers1"; ref_gene_id "Zm00001d028129";
1	StringTie	exon	23626876	23627370	1000	+	.	gene_id "MSTRG.804"; transcript_id "Zm00001d028129_T001"; exon_number "3"; gene_name "grassy tillers1"; ref_gene_id "Zm00001d028129";
1	StringTie	transcript	23626876	23627370	1000	+	.	gene_id "MSTRG.804"; transcript_id "Zm00001d028129_T003"; gene_name "grassy tillers1"; ref_gene_id "Zm00001d028129";
1	StringTie	exon	23626876	23627370	1000	+	.	gene_id "MSTRG.804"; transcript_id "Zm00001d028129_T003"; exon_number "1"; gene_name "grassy tillers1"; ref_gene_id "Zm00001d028129";
1	StringTie	transcript	23628929	23633284	1000	-	.	gene_id "MSTRG.805"; transcript_id "Zm00001d028130_T002"; gene_name "Zm00001d028130"; ref_gene_id "Zm00001d028130";
1	StringTie	exon	23628929	23629198	1000	-	.	gene_id "MSTRG.805"; transcript_id "Zm00001d028130_T002"; exon_number "1"; gene_name "Zm00001d028130"; ref_gene_id "Zm00001d028130";
1	StringTie	exon	23630320	23630472	1000	-	.	gene_id "MSTRG.805"; transcript_id "Zm00001d028130_T002"; exon_number "2"; gene_name "Zm00001d028130"; ref_gene_id "Zm00001d028130";
1	StringTie	exon	23633004	23633284	1000	-	.	gene_id "MSTRG.805"; transcript_id "Zm00001d028130_T002"; exon_number "3"; gene_name "Zm00001d028130"; ref_gene_id "Zm00001d028130";
1	StringTie	transcript	24010240	24011578	1000	+	.	gene_id "MSTRG.816"; transcript_id "Zm00001d028143_T003"; gene_name "Zm00001d028143"; ref_gene_id "Zm00001d028143";
1	StringTie	exon	24010240	24010289	1000	+	.	gene_id "MSTRG.816"; transcript_id "Zm00001d028143_T003"; exon_number "1"; gene_name "Zm00001d028143"; ref_gene_id "Zm00001d028143";
1	StringTie	exon	24010363	24010405	1000	+	.	gene_id "MSTRG.816"; transcript_id "Zm00001d028143_T003"; exon_number "2"; gene_name "Zm00001d028143"; ref_gene_id "Zm00001d028143";
1	StringTie	exon	24010790	24010849	1000	+	.	gene_id "MSTRG.816"; transcript_id "Zm00001d028143_T003"; exon_number "3"; gene_name "Zm00001d028143"; ref_gene_id "Zm00001d028143";
1	StringTie	exon	24010983	24011042	1000	+	.	gene_id "MSTRG.816"; transcript_id "Zm00001d028143_T003"; exon_number "4"; gene_name "Zm00001d028143"; ref_gene_id "Zm00001d028143";
1	StringTie	exon	24011233	24011578	1000	+	.	gene_id "MSTRG.816"; transcript_id "Zm00001d028143_T003"; exon_number "5"; gene_name "Zm00001d028143"; ref_gene_id "Zm00001d028143";
1	StringTie	transcript	24010811	24011578	1000	+	.	gene_id "MSTRG.816"; transcript_id "Zm00001d028143_T007"; gene_name "Zm00001d028143"; ref_gene_id "Zm00001d028143";
1	StringTie	exon	24010811	24010849	1000	+	.	gene_id "MSTRG.816"; transcript_id "Zm00001d028143_T007"; exon_number "1"; gene_name "Zm00001d028143"; ref_gene_id "Zm00001d028143";
1	StringTie	exon	24010983	24011042	1000	+	.	gene_id "MSTRG.816"; transcript_id "Zm00001d028143_T007"; exon_number "2"; gene_name "Zm00001d028143"; ref_gene_id "Zm00001d028143";
1	StringTie	exon	24011233	24011578	1000	+	.	gene_id "MSTRG.816"; transcript_id "Zm00001d028143_T007"; exon_number "3"; gene_name "Zm00001d028143"; ref_gene_id "Zm00001d028143";
1	StringTie	transcript	25546257	25547137	1000	-	.	gene_id "MSTRG.844"; transcript_id "Zm00001d028177_T002"; gene_name "Zm00001d028177"; ref_gene_id "Zm00001d028177";
1	StringTie	exon	25546257	25546372	1000	-	.	gene_id "MSTRG.844"; transcript_id "Zm00001d028177_T002"; exon_number "1"; gene_name "Zm00001d028177"; ref_gene_id "Zm00001d028177";
1	StringTie	exon	25546461	25546602	1000	-	.	gene_id "MSTRG.844"; transcript_id "Zm00001d028177_T002"; exon_number "2"; gene_name "Zm00001d028177"; ref_gene_id "Zm00001d028177";
1	StringTie	exon	25547117	25547137	1000	-	.	gene_id "MSTRG.844"; transcript_id "Zm00001d028177_T002"; exon_number "3"; gene_name "Zm00001d028177"; ref_gene_id "Zm00001d028177";
1	StringTie	transcript	25546257	25565803	1000	-	.	gene_id "MSTRG.844"; transcript_id "Zm00001d028177_T013"; gene_name "Zm00001d028177"; ref_gene_id "Zm00001d028177";
1	StringTie	exon	25546257	25546372	1000	-	.	gene_id "MSTRG.844"; transcript_id "Zm00001d028177_T013"; exon_number "1"; gene_name "Zm00001d028177"; ref_gene_id "Zm00001d028177";
1	StringTie	exon	25546461	25546602	1000	-	.	gene_id "MSTRG.844"; transcript_id "Zm00001d028177_T013"; exon_number "2"; gene_name "Zm00001d028177"; ref_gene_id "Zm00001d028177";
1	StringTie	exon	25547117	25547137	1000	-	.	gene_id "MSTRG.844"; transcript_id "Zm00001d028177_T013"; exon_number "3"; gene_name "Zm00001d028177"; ref_gene_id "Zm00001d028177";
1	StringTie	exon	25565710	25565803	1000	-	.	gene_id "MSTRG.844"; transcript_id "Zm00001d028177_T013"; exon_number "4"; gene_name "Zm00001d028177"; ref_gene_id "Zm00001d028177";
1	StringTie	transcript	25565710	25565803	1000	-	.	gene_id "MSTRG.844"; transcript_id "Zm00001d028177_T020"; gene_name "Zm00001d028177"; ref_gene_id "Zm00001d028177";
1	StringTie	exon	25565710	25565803	1000	-	.	gene_id "MSTRG.844"; transcript_id "Zm00001d028177_T020"; exon_number "1"; gene_name "Zm00001d028177"; ref_gene_id "Zm00001d028177";
1	StringTie	transcript	25636382	25636718	1000	+	.	gene_id "MSTRG.847"; transcript_id "Zm00001d028180_T006"; gene_name "low phytic acid1"; ref_gene_id "Zm00001d028180";
1	StringTie	exon	25636382	25636718	1000	+	.	gene_id "MSTRG.847"; transcript_id "Zm00001d028180_T006"; exon_number "1"; gene_name "low phytic acid1"; ref_gene_id "Zm00001d028180";
1	StringTie	transcript	25729020	25731570	1000	-	.	gene_id "MSTRG.850"; transcript_id "Zm00001d028183_T007"; gene_name "Zm00001d028183"; ref_gene_id "Zm00001d028183";
1	StringTie	exon	25729020	25729195	1000	-	.	gene_id "MSTRG.850"; transcript_id "Zm00001d028183_T007"; exon_number "1"; gene_name "Zm00001d028183"; ref_gene_id "Zm00001d028183";
1	StringTie	exon	25729290	25729350	1000	-	.	gene_id "MSTRG.850"; transcript_id "Zm00001d028183_T007"; exon_number "2"; gene_name "Zm00001d028183"; ref_gene_id "Zm00001d028183";
1	StringTie	exon	25730252	25730341	1000	-	.	gene_id "MSTRG.850"; transcript_id "Zm00001d028183_T007"; exon_number "3"; gene_name "Zm00001d028183"; ref_gene_id "Zm00001d028183";
1	StringTie	exon	25730533	25730600	1000	-	.	gene_id "MSTRG.850"; transcript_id "Zm00001d028183_T007"; exon_number "4"; gene_name "Zm00001d028183"; ref_gene_id "Zm00001d028183";
1	StringTie	exon	25731498	25731570	1000	-	.	gene_id "MSTRG.850"; transcript_id "Zm00001d028183_T007"; exon_number "5"; gene_name "Zm00001d028183"; ref_gene_id "Zm00001d028183";
1	StringTie	transcript	25742337	25743954	1000	+	.	gene_id "MSTRG.853"; transcript_id "Zm00001d028186_T001"; gene_name "Zm00001d028186"; ref_gene_id "Zm00001d028186";
1	StringTie	exon	25742337	25743954	1000	+	.	gene_id "MSTRG.853"; transcript_id "Zm00001d028186_T001"; exon_number "1"; gene_name "Zm00001d028186"; ref_gene_id "Zm00001d028186";
1	StringTie	transcript	25756421	25757296	1000	+	.	gene_id "MSTRG.854"; transcript_id "Zm00001d028187_T003"; gene_name "Zm00001d028187"; ref_gene_id "Zm00001d028187";
1	StringTie	exon	25756421	25756624	1000	+	.	gene_id "MSTRG.854"; transcript_id "Zm00001d028187_T003"; exon_number "1"; gene_name "Zm00001d028187"; ref_gene_id "Zm00001d028187";
1	StringTie	exon	25757023	25757296	1000	+	.	gene_id "MSTRG.854"; transcript_id "Zm00001d028187_T003"; exon_number "2"; gene_name "Zm00001d028187"; ref_gene_id "Zm00001d028187";
1	StringTie	transcript	25761507	25761872	1000	-	.	gene_id "MSTRG.855"; transcript_id "Zm00001d028188_T003"; gene_name "Zm00001d028188"; ref_gene_id "Zm00001d028188";
1	StringTie	exon	25761507	25761872	1000	-	.	gene_id "MSTRG.855"; transcript_id "Zm00001d028188_T003"; exon_number "1"; gene_name "Zm00001d028188"; ref_gene_id "Zm00001d028188";
1	StringTie	transcript	25770348	25774094	1000	-	.	gene_id "MSTRG.856"; transcript_id "Zm00001d028189_T003"; gene_name "Zm00001d028189"; ref_gene_id "Zm00001d028189";
1	StringTie	exon	25770348	25770438	1000	-	.	gene_id "MSTRG.856"; transcript_id "Zm00001d028189_T003"; exon_number "1"; gene_name "Zm00001d028189"; ref_gene_id "Zm00001d028189";
1	StringTie	exon	25770543	25770614	1000	-	.	gene_id "MSTRG.856"; transcript_id "Zm00001d028189_T003"; exon_number "2"; gene_name "Zm00001d028189"; ref_gene_id "Zm00001d028189";
1	StringTie	exon	25770725	25770777	1000	-	.	gene_id "MSTRG.856"; transcript_id "Zm00001d028189_T003"; exon_number "3"; gene_name "Zm00001d028189"; ref_gene_id "Zm00001d028189";
1	StringTie	exon	25772411	25772486	1000	-	.	gene_id "MSTRG.856"; transcript_id "Zm00001d028189_T003"; exon_number "4"; gene_name "Zm00001d028189"; ref_gene_id "Zm00001d028189";
1	StringTie	exon	25772993	25773140	1000	-	.	gene_id "MSTRG.856"; transcript_id "Zm00001d028189_T003"; exon_number "5"; gene_name "Zm00001d028189"; ref_gene_id "Zm00001d028189";
1	StringTie	exon	25773788	25774094	1000	-	.	gene_id "MSTRG.856"; transcript_id "Zm00001d028189_T003"; exon_number "6"; gene_name "Zm00001d028189"; ref_gene_id "Zm00001d028189";
1	StringTie	transcript	25791754	25796550	1000	+	.	gene_id "MSTRG.857"; transcript_id "Zm00001d028191_T003"; gene_name "Zm00001d028191"; ref_gene_id "Zm00001d028191";
1	StringTie	exon	25791754	25791852	1000	+	.	gene_id "MSTRG.857"; transcript_id "Zm00001d028191_T003"; exon_number "1"; gene_name "Zm00001d028191"; ref_gene_id "Zm00001d028191";
1	StringTie	exon	25796079	25796550	1000	+	.	gene_id "MSTRG.857"; transcript_id "Zm00001d028191_T003"; exon_number "2"; gene_name "Zm00001d028191"; ref_gene_id "Zm00001d028191";
1	StringTie	transcript	25803331	25805381	1000	+	.	gene_id "MSTRG.857"; transcript_id "Zm00001d028191_T004"; gene_name "Zm00001d028191"; ref_gene_id "Zm00001d028191";
1	StringTie	exon	25803331	25803498	1000	+	.	gene_id "MSTRG.857"; transcript_id "Zm00001d028191_T004"; exon_number "1"; gene_name "Zm00001d028191"; ref_gene_id "Zm00001d028191";
1	StringTie	exon	25804841	25804858	1000	+	.	gene_id "MSTRG.857"; transcript_id "Zm00001d028191_T004"; exon_number "2"; gene_name "Zm00001d028191"; ref_gene_id "Zm00001d028191";
1	StringTie	exon	25804949	25805381	1000	+	.	gene_id "MSTRG.857"; transcript_id "Zm00001d028191_T004"; exon_number "3"; gene_name "Zm00001d028191"; ref_gene_id "Zm00001d028191";
1	StringTie	transcript	25917285	25917473	1000	+	.	gene_id "MSTRG.858"; transcript_id "Zm00001d028193_T015"; gene_name "Zm00001d028193"; ref_gene_id "Zm00001d028193";
1	StringTie	exon	25917285	25917473	1000	+	.	gene_id "MSTRG.858"; transcript_id "Zm00001d028193_T015"; exon_number "1"; gene_name "Zm00001d028193"; ref_gene_id "Zm00001d028193";
1	StringTie	transcript	25917285	25917679	1000	+	.	gene_id "MSTRG.858"; transcript_id "Zm00001d028193_T010"; gene_name "Zm00001d028193"; ref_gene_id "Zm00001d028193";
1	StringTie	exon	25917285	25917408	1000	+	.	gene_id "MSTRG.858"; transcript_id "Zm00001d028193_T010"; exon_number "1"; gene_name "Zm00001d028193"; ref_gene_id "Zm00001d028193";
1	StringTie	exon	25917566	25917679	1000	+	.	gene_id "MSTRG.858"; transcript_id "Zm00001d028193_T010"; exon_number "2"; gene_name "Zm00001d028193"; ref_gene_id "Zm00001d028193";
1	StringTie	transcript	26002060	26002450	1000	-	.	gene_id "MSTRG.864"; transcript_id "Zm00001d028199_T001"; gene_name "Zm00001d028199"; ref_gene_id "Zm00001d028199";
1	StringTie	exon	26002060	26002234	1000	-	.	gene_id "MSTRG.864"; transcript_id "Zm00001d028199_T001"; exon_number "1"; gene_name "Zm00001d028199"; ref_gene_id "Zm00001d028199";
1	StringTie	exon	26002342	26002450	1000	-	.	gene_id "MSTRG.864"; transcript_id "Zm00001d028199_T001"; exon_number "2"; gene_name "Zm00001d028199"; ref_gene_id "Zm00001d028199";
1	StringTie	transcript	26005913	26009085	1000	-	.	gene_id "MSTRG.864"; transcript_id "Zm00001d028199_T005"; gene_name "Zm00001d028199"; ref_gene_id "Zm00001d028199";
1	StringTie	exon	26005913	26005928	1000	-	.	gene_id "MSTRG.864"; transcript_id "Zm00001d028199_T005"; exon_number "1"; gene_name "Zm00001d028199"; ref_gene_id "Zm00001d028199";
1	StringTie	exon	26008290	26008360	1000	-	.	gene_id "MSTRG.864"; transcript_id "Zm00001d028199_T005"; exon_number "2"; gene_name "Zm00001d028199"; ref_gene_id "Zm00001d028199";
1	StringTie	exon	26008751	26009085	1000	-	.	gene_id "MSTRG.864"; transcript_id "Zm00001d028199_T005"; exon_number "3"; gene_name "Zm00001d028199"; ref_gene_id "Zm00001d028199";
1	StringTie	transcript	26045273	26045626	1000	+	.	gene_id "MSTRG.866"; transcript_id "Zm00001d028201_T005"; gene_name "Zm00001d028201"; ref_gene_id "Zm00001d028201";
1	StringTie	exon	26045273	26045626	1000	+	.	gene_id "MSTRG.866"; transcript_id "Zm00001d028201_T005"; exon_number "1"; gene_name "Zm00001d028201"; ref_gene_id "Zm00001d028201";
1	StringTie	transcript	26139547	26140505	1000	+	.	gene_id "MSTRG.868"; transcript_id "Zm00001d028203_T047"; gene_name "Zm00001d028203"; ref_gene_id "Zm00001d028203";
1	StringTie	exon	26139547	26140505	1000	+	.	gene_id "MSTRG.868"; transcript_id "Zm00001d028203_T047"; exon_number "1"; gene_name "Zm00001d028203"; ref_gene_id "Zm00001d028203";
1	StringTie	transcript	26335118	26335457	1000	+	.	gene_id "MSTRG.872"; transcript_id "Zm00001d028207_T011"; gene_name "Zm00001d028207"; ref_gene_id "Zm00001d028207";
1	StringTie	exon	26335118	26335157	1000	+	.	gene_id "MSTRG.872"; transcript_id "Zm00001d028207_T011"; exon_number "1"; gene_name "Zm00001d028207"; ref_gene_id "Zm00001d028207";
1	StringTie	exon	26335243	26335457	1000	+	.	gene_id "MSTRG.872"; transcript_id "Zm00001d028207_T011"; exon_number "2"; gene_name "Zm00001d028207"; ref_gene_id "Zm00001d028207";
1	StringTie	transcript	26336322	26346030	1000	+	.	gene_id "MSTRG.872"; transcript_id "Zm00001d028207_T007"; gene_name "Zm00001d028207"; ref_gene_id "Zm00001d028207";
1	StringTie	exon	26336322	26336366	1000	+	.	gene_id "MSTRG.872"; transcript_id "Zm00001d028207_T007"; exon_number "1"; gene_name "Zm00001d028207"; ref_gene_id "Zm00001d028207";
1	StringTie	exon	26345664	26345786	1000	+	.	gene_id "MSTRG.872"; transcript_id "Zm00001d028207_T007"; exon_number "2"; gene_name "Zm00001d028207"; ref_gene_id "Zm00001d028207";
1	StringTie	exon	26345885	26346030	1000	+	.	gene_id "MSTRG.872"; transcript_id "Zm00001d028207_T007"; exon_number "3"; gene_name "Zm00001d028207"; ref_gene_id "Zm00001d028207";
1	StringTie	transcript	26429396	26430958	1000	+	.	gene_id "MSTRG.873"; transcript_id "Zm00001d028208_T027"; gene_name "Zm00001d028208"; ref_gene_id "Zm00001d028208";
1	StringTie	exon	26429396	26429422	1000	+	.	gene_id "MSTRG.873"; transcript_id "Zm00001d028208_T027"; exon_number "1"; gene_name "Zm00001d028208"; ref_gene_id "Zm00001d028208";
1	StringTie	exon	26429491	26429565	1000	+	.	gene_id "MSTRG.873"; transcript_id "Zm00001d028208_T027"; exon_number "2"; gene_name "Zm00001d028208"; ref_gene_id "Zm00001d028208";
1	StringTie	exon	26430608	26430730	1000	+	.	gene_id "MSTRG.873"; transcript_id "Zm00001d028208_T027"; exon_number "3"; gene_name "Zm00001d028208"; ref_gene_id "Zm00001d028208";
1	StringTie	exon	26430918	26430958	1000	+	.	gene_id "MSTRG.873"; transcript_id "Zm00001d028208_T027"; exon_number "4"; gene_name "Zm00001d028208"; ref_gene_id "Zm00001d028208";
1	StringTie	transcript	26430656	26431157	1000	+	.	gene_id "MSTRG.873"; transcript_id "Zm00001d028208_T040"; gene_name "Zm00001d028208"; ref_gene_id "Zm00001d028208";
1	StringTie	exon	26430656	26430730	1000	+	.	gene_id "MSTRG.873"; transcript_id "Zm00001d028208_T040"; exon_number "1"; gene_name "Zm00001d028208"; ref_gene_id "Zm00001d028208";
1	StringTie	exon	26430872	26431157	1000	+	.	gene_id "MSTRG.873"; transcript_id "Zm00001d028208_T040"; exon_number "2"; gene_name "Zm00001d028208"; ref_gene_id "Zm00001d028208";
1	StringTie	transcript	26772216	26775903	1000	+	.	gene_id "MSTRG.881"; transcript_id "Zm00001d028216_T002"; gene_name "indeterminate floral apex1"; ref_gene_id "Zm00001d028216";
1	StringTie	exon	26772216	26772380	1000	+	.	gene_id "MSTRG.881"; transcript_id "Zm00001d028216_T002"; exon_number "1"; gene_name "indeterminate floral apex1"; ref_gene_id "Zm00001d028216";
1	StringTie	exon	26775583	26775597	1000	+	.	gene_id "MSTRG.881"; transcript_id "Zm00001d028216_T002"; exon_number "2"; gene_name "indeterminate floral apex1"; ref_gene_id "Zm00001d028216";
1	StringTie	exon	26775678	26775903	1000	+	.	gene_id "MSTRG.881"; transcript_id "Zm00001d028216_T002"; exon_number "3"; gene_name "indeterminate floral apex1"; ref_gene_id "Zm00001d028216";
1	StringTie	transcript	26890982	26891238	1000	-	.	gene_id "MSTRG.883"; transcript_id "Zm00001d028218_T015"; gene_name "Zm00001d028218"; ref_gene_id "Zm00001d028218";
1	StringTie	exon	26890982	26891095	1000	-	.	gene_id "MSTRG.883"; transcript_id "Zm00001d028218_T015"; exon_number "1"; gene_name "Zm00001d028218"; ref_gene_id "Zm00001d028218";
1	StringTie	exon	26891152	26891238	1000	-	.	gene_id "MSTRG.883"; transcript_id "Zm00001d028218_T015"; exon_number "2"; gene_name "Zm00001d028218"; ref_gene_id "Zm00001d028218";
1	StringTie	transcript	26899240	26899704	1000	-	.	gene_id "MSTRG.883"; transcript_id "Zm00001d028218_T003"; gene_name "Zm00001d028218"; ref_gene_id "Zm00001d028218";
1	StringTie	exon	26899240	26899388	1000	-	.	gene_id "MSTRG.883"; transcript_id "Zm00001d028218_T003"; exon_number "1"; gene_name "Zm00001d028218"; ref_gene_id "Zm00001d028218";
1	StringTie	exon	26899488	26899704	1000	-	.	gene_id "MSTRG.883"; transcript_id "Zm00001d028218_T003"; exon_number "2"; gene_name "Zm00001d028218"; ref_gene_id "Zm00001d028218";
1	StringTie	transcript	27286312	27288436	1000	-	.	gene_id "MSTRG.894"; transcript_id "Zm00001d028228_T004"; gene_name "multidrug and toxic compound extrusion3"; ref_gene_id "Zm00001d028228";
1	StringTie	exon	27286312	27286412	1000	-	.	gene_id "MSTRG.894"; transcript_id "Zm00001d028228_T004"; exon_number "1"; gene_name "multidrug and toxic compound extrusion3"; ref_gene_id "Zm00001d028228";
1	StringTie	exon	27286523	27286649	1000	-	.	gene_id "MSTRG.894"; transcript_id "Zm00001d028228_T004"; exon_number "2"; gene_name "multidrug and toxic compound extrusion3"; ref_gene_id "Zm00001d028228";
1	StringTie	exon	27286735	27286959	1000	-	.	gene_id "MSTRG.894"; transcript_id "Zm00001d028228_T004"; exon_number "3"; gene_name "multidrug and toxic compound extrusion3"; ref_gene_id "Zm00001d028228";
1	StringTie	exon	27287861	27287990	1000	-	.	gene_id "MSTRG.894"; transcript_id "Zm00001d028228_T004"; exon_number "4"; gene_name "multidrug and toxic compound extrusion3"; ref_gene_id "Zm00001d028228";
1	StringTie	exon	27288097	27288436	1000	-	.	gene_id "MSTRG.894"; transcript_id "Zm00001d028228_T004"; exon_number "5"; gene_name "multidrug and toxic compound extrusion3"; ref_gene_id "Zm00001d028228";
1	StringTie	transcript	27572000	27572140	1000	+	.	gene_id "MSTRG.901"; transcript_id "Zm00001d028237_T004"; gene_name "Zm00001d028237"; ref_gene_id "Zm00001d028237";
1	StringTie	exon	27572000	27572140	1000	+	.	gene_id "MSTRG.901"; transcript_id "Zm00001d028237_T004"; exon_number "1"; gene_name "Zm00001d028237"; ref_gene_id "Zm00001d028237";
1	StringTie	transcript	27572000	27574225	1000	+	.	gene_id "MSTRG.901"; transcript_id "Zm00001d028237_T008"; gene_name "Zm00001d028237"; ref_gene_id "Zm00001d028237";
1	StringTie	exon	27572000	27572140	1000	+	.	gene_id "MSTRG.901"; transcript_id "Zm00001d028237_T008"; exon_number "1"; gene_name "Zm00001d028237"; ref_gene_id "Zm00001d028237";
1	StringTie	exon	27573683	27573729	1000	+	.	gene_id "MSTRG.901"; transcript_id "Zm00001d028237_T008"; exon_number "2"; gene_name "Zm00001d028237"; ref_gene_id "Zm00001d028237";
1	StringTie	exon	27573818	27573884	1000	+	.	gene_id "MSTRG.901"; transcript_id "Zm00001d028237_T008"; exon_number "3"; gene_name "Zm00001d028237"; ref_gene_id "Zm00001d028237";
1	StringTie	exon	27573970	27574042	1000	+	.	gene_id "MSTRG.901"; transcript_id "Zm00001d028237_T008"; exon_number "4"; gene_name "Zm00001d028237"; ref_gene_id "Zm00001d028237";
1	StringTie	exon	27574107	27574225	1000	+	.	gene_id "MSTRG.901"; transcript_id "Zm00001d028237_T008"; exon_number "5"; gene_name "Zm00001d028237"; ref_gene_id "Zm00001d028237";
1	StringTie	transcript	27573683	27574097	1000	+	.	gene_id "MSTRG.901"; transcript_id "Zm00001d028237_T015"; gene_name "Zm00001d028237"; ref_gene_id "Zm00001d028237";
1	StringTie	exon	27573683	27573729	1000	+	.	gene_id "MSTRG.901"; transcript_id "Zm00001d028237_T015"; exon_number "1"; gene_name "Zm00001d028237"; ref_gene_id "Zm00001d028237";
1	StringTie	exon	27573818	27573884	1000	+	.	gene_id "MSTRG.901"; transcript_id "Zm00001d028237_T015"; exon_number "2"; gene_name "Zm00001d028237"; ref_gene_id "Zm00001d028237";
1	StringTie	exon	27573970	27574097	1000	+	.	gene_id "MSTRG.901"; transcript_id "Zm00001d028237_T015"; exon_number "3"; gene_name "Zm00001d028237"; ref_gene_id "Zm00001d028237";
1	StringTie	transcript	27837493	27839195	1000	-	.	gene_id "MSTRG.906"; transcript_id "Zm00001d028244_T017"; gene_name "Zm00001d028244"; ref_gene_id "Zm00001d028244";
1	StringTie	exon	27837493	27837522	1000	-	.	gene_id "MSTRG.906"; transcript_id "Zm00001d028244_T017"; exon_number "1"; gene_name "Zm00001d028244"; ref_gene_id "Zm00001d028244";
1	StringTie	exon	27837611	27839195	1000	-	.	gene_id "MSTRG.906"; transcript_id "Zm00001d028244_T017"; exon_number "2"; gene_name "Zm00001d028244"; ref_gene_id "Zm00001d028244";
1	StringTie	transcript	28169402	28169851	1000	-	.	gene_id "MSTRG.918"; transcript_id "Zm00001d028260_T003"; gene_name "glutamine synthetase6"; ref_gene_id "Zm00001d028260";
1	StringTie	exon	28169402	28169535	1000	-	.	gene_id "MSTRG.918"; transcript_id "Zm00001d028260_T003"; exon_number "1"; gene_name "glutamine synthetase6"; ref_gene_id "Zm00001d028260";
1	StringTie	exon	28169654	28169851	1000	-	.	gene_id "MSTRG.918"; transcript_id "Zm00001d028260_T003"; exon_number "2"; gene_name "glutamine synthetase6"; ref_gene_id "Zm00001d028260";
1	StringTie	transcript	28394304	28396158	1000	+	.	gene_id "MSTRG.920"; transcript_id "Zm00001d028262_T044"; gene_name "Zm00001d028262"; ref_gene_id "Zm00001d028262";
1	StringTie	exon	28394304	28394428	1000	+	.	gene_id "MSTRG.920"; transcript_id "Zm00001d028262_T044"; exon_number "1"; gene_name "Zm00001d028262"; ref_gene_id "Zm00001d028262";
1	StringTie	exon	28395868	28396158	1000	+	.	gene_id "MSTRG.920"; transcript_id "Zm00001d028262_T044"; exon_number "2"; gene_name "Zm00001d028262"; ref_gene_id "Zm00001d028262";
1	StringTie	transcript	28577248	28577849	1000	+	.	gene_id "MSTRG.922"; transcript_id "Zm00001d028264_T005"; gene_name "Zm00001d028264"; ref_gene_id "Zm00001d028264";
1	StringTie	exon	28577248	28577849	1000	+	.	gene_id "MSTRG.922"; transcript_id "Zm00001d028264_T005"; exon_number "1"; gene_name "Zm00001d028264"; ref_gene_id "Zm00001d028264";
1	StringTie	transcript	29407411	29410659	1000	+	.	gene_id "MSTRG.949"; transcript_id "Zm00001d028293_T002"; gene_name "Zm00001d028293"; ref_gene_id "Zm00001d028293";
1	StringTie	exon	29407411	29407640	1000	+	.	gene_id "MSTRG.949"; transcript_id "Zm00001d028293_T002"; exon_number "1"; gene_name "Zm00001d028293"; ref_gene_id "Zm00001d028293";
1	StringTie	exon	29410382	29410659	1000	+	.	gene_id "MSTRG.949"; transcript_id "Zm00001d028293_T002"; exon_number "2"; gene_name "Zm00001d028293"; ref_gene_id "Zm00001d028293";
1	StringTie	transcript	29671727	29673530	1000	+	.	gene_id "MSTRG.956"; transcript_id "Zm00001d028299_T005"; gene_name "Zm00001d028299"; ref_gene_id "Zm00001d028299";
1	StringTie	exon	29671727	29673530	1000	+	.	gene_id "MSTRG.956"; transcript_id "Zm00001d028299_T005"; exon_number "1"; gene_name "Zm00001d028299"; ref_gene_id "Zm00001d028299";
1	StringTie	transcript	29986079	29988114	1000	+	.	gene_id "MSTRG.966"; transcript_id "Zm00001d028308_T001"; gene_name "Zm00001d028308"; ref_gene_id "Zm00001d028308";
1	StringTie	exon	29986079	29986102	1000	+	.	gene_id "MSTRG.966"; transcript_id "Zm00001d028308_T001"; exon_number "1"; gene_name "Zm00001d028308"; ref_gene_id "Zm00001d028308";
1	StringTie	exon	29986898	29988114	1000	+	.	gene_id "MSTRG.966"; transcript_id "Zm00001d028308_T001"; exon_number "2"; gene_name "Zm00001d028308"; ref_gene_id "Zm00001d028308";
1	StringTie	transcript	30969894	30971253	1000	-	.	gene_id "MSTRG.982"; transcript_id "Zm00001d028328_T001"; gene_name "Zm00001d028328"; ref_gene_id "Zm00001d028328";
1	StringTie	exon	30969894	30970101	1000	-	.	gene_id "MSTRG.982"; transcript_id "Zm00001d028328_T001"; exon_number "1"; gene_name "Zm00001d028328"; ref_gene_id "Zm00001d028328";
1	StringTie	exon	30971162	30971253	1000	-	.	gene_id "MSTRG.982"; transcript_id "Zm00001d028328_T001"; exon_number "2"; gene_name "Zm00001d028328"; ref_gene_id "Zm00001d028328";
1	StringTie	transcript	31058942	31059325	1000	-	.	gene_id "MSTRG.985"; transcript_id "Zm00001d028332_T031"; gene_name "Zm00001d028332"; ref_gene_id "Zm00001d028332";
1	StringTie	exon	31058942	31059061	1000	-	.	gene_id "MSTRG.985"; transcript_id "Zm00001d028332_T031"; exon_number "1"; gene_name "Zm00001d028332"; ref_gene_id "Zm00001d028332";
1	StringTie	exon	31059149	31059325	1000	-	.	gene_id "MSTRG.985"; transcript_id "Zm00001d028332_T031"; exon_number "2"; gene_name "Zm00001d028332"; ref_gene_id "Zm00001d028332";
1	StringTie	transcript	31058942	31060753	1000	-	.	gene_id "MSTRG.985"; transcript_id "Zm00001d028332_T033"; gene_name "Zm00001d028332"; ref_gene_id "Zm00001d028332";
1	StringTie	exon	31058942	31059061	1000	-	.	gene_id "MSTRG.985"; transcript_id "Zm00001d028332_T033"; exon_number "1"; gene_name "Zm00001d028332"; ref_gene_id "Zm00001d028332";
1	StringTie	exon	31059149	31059325	1000	-	.	gene_id "MSTRG.985"; transcript_id "Zm00001d028332_T033"; exon_number "2"; gene_name "Zm00001d028332"; ref_gene_id "Zm00001d028332";
1	StringTie	exon	31060396	31060753	1000	-	.	gene_id "MSTRG.985"; transcript_id "Zm00001d028332_T033"; exon_number "3"; gene_name "Zm00001d028332"; ref_gene_id "Zm00001d028332";
1	StringTie	transcript	31060396	31060753	1000	-	.	gene_id "MSTRG.985"; transcript_id "Zm00001d028332_T020"; gene_name "Zm00001d028332"; ref_gene_id "Zm00001d028332";
1	StringTie	exon	31060396	31060753	1000	-	.	gene_id "MSTRG.985"; transcript_id "Zm00001d028332_T020"; exon_number "1"; gene_name "Zm00001d028332"; ref_gene_id "Zm00001d028332";
1	StringTie	transcript	31216412	31216605	1000	-	.	gene_id "MSTRG.992"; transcript_id "Zm00001d028339_T031"; gene_name "Zm00001d028339"; ref_gene_id "Zm00001d028339";
1	StringTie	exon	31216412	31216605	1000	-	.	gene_id "MSTRG.992"; transcript_id "Zm00001d028339_T031"; exon_number "1"; gene_name "Zm00001d028339"; ref_gene_id "Zm00001d028339";
1	StringTie	transcript	31683903	31684302	1000	+	.	gene_id "MSTRG.1001"; transcript_id "Zm00001d028352_T005"; gene_name "Zm00001d028352"; ref_gene_id "Zm00001d028352";
1	StringTie	exon	31683903	31684096	1000	+	.	gene_id "MSTRG.1001"; transcript_id "Zm00001d028352_T005"; exon_number "1"; gene_name "Zm00001d028352"; ref_gene_id "Zm00001d028352";
1	StringTie	exon	31684196	31684302	1000	+	.	gene_id "MSTRG.1001"; transcript_id "Zm00001d028352_T005"; exon_number "2"; gene_name "Zm00001d028352"; ref_gene_id "Zm00001d028352";
1	StringTie	transcript	31906867	31908777	1000	+	.	gene_id "MSTRG.1006"; transcript_id "Zm00001d028358_T009"; gene_name "Zm00001d028358"; ref_gene_id "Zm00001d028358";
1	StringTie	exon	31906867	31906916	1000	+	.	gene_id "MSTRG.1006"; transcript_id "Zm00001d028358_T009"; exon_number "1"; gene_name "Zm00001d028358"; ref_gene_id "Zm00001d028358";
1	StringTie	exon	31907394	31907493	1000	+	.	gene_id "MSTRG.1006"; transcript_id "Zm00001d028358_T009"; exon_number "2"; gene_name "Zm00001d028358"; ref_gene_id "Zm00001d028358";
1	StringTie	exon	31908147	31908182	1000	+	.	gene_id "MSTRG.1006"; transcript_id "Zm00001d028358_T009"; exon_number "3"; gene_name "Zm00001d028358"; ref_gene_id "Zm00001d028358";
1	StringTie	exon	31908477	31908777	1000	+	.	gene_id "MSTRG.1006"; transcript_id "Zm00001d028358_T009"; exon_number "4"; gene_name "Zm00001d028358"; ref_gene_id "Zm00001d028358";
1	StringTie	transcript	31907491	31908777	1000	+	.	gene_id "MSTRG.1006"; transcript_id "Zm00001d028358_T002"; gene_name "Zm00001d028358"; ref_gene_id "Zm00001d028358";
1	StringTie	exon	31907491	31907493	1000	+	.	gene_id "MSTRG.1006"; transcript_id "Zm00001d028358_T002"; exon_number "1"; gene_name "Zm00001d028358"; ref_gene_id "Zm00001d028358";
1	StringTie	exon	31908147	31908182	1000	+	.	gene_id "MSTRG.1006"; transcript_id "Zm00001d028358_T002"; exon_number "2"; gene_name "Zm00001d028358"; ref_gene_id "Zm00001d028358";
1	StringTie	exon	31908477	31908777	1000	+	.	gene_id "MSTRG.1006"; transcript_id "Zm00001d028358_T002"; exon_number "3"; gene_name "Zm00001d028358"; ref_gene_id "Zm00001d028358";
1	StringTie	transcript	32047363	32048554	1000	+	.	gene_id "MSTRG.1007"; transcript_id "Zm00001d028359_T003"; gene_name "Zm00001d028359"; ref_gene_id "Zm00001d028359";
1	StringTie	exon	32047363	32047378	1000	+	.	gene_id "MSTRG.1007"; transcript_id "Zm00001d028359_T003"; exon_number "1"; gene_name "Zm00001d028359"; ref_gene_id "Zm00001d028359";
1	StringTie	exon	32047813	32048554	1000	+	.	gene_id "MSTRG.1007"; transcript_id "Zm00001d028359_T003"; exon_number "2"; gene_name "Zm00001d028359"; ref_gene_id "Zm00001d028359";
1	StringTie	transcript	32438592	32439571	1000	-	.	gene_id "MSTRG.1019"; transcript_id "Zm00001d028372_T009"; gene_name "bZIP-transcription factor 115"; ref_gene_id "Zm00001d028372";
1	StringTie	exon	32438592	32438597	1000	-	.	gene_id "MSTRG.1019"; transcript_id "Zm00001d028372_T009"; exon_number "1"; gene_name "bZIP-transcription factor 115"; ref_gene_id "Zm00001d028372";
1	StringTie	exon	32439106	32439207	1000	-	.	gene_id "MSTRG.1019"; transcript_id "Zm00001d028372_T009"; exon_number "2"; gene_name "bZIP-transcription factor 115"; ref_gene_id "Zm00001d028372";
1	StringTie	exon	32439290	32439349	1000	-	.	gene_id "MSTRG.1019"; transcript_id "Zm00001d028372_T009"; exon_number "3"; gene_name "bZIP-transcription factor 115"; ref_gene_id "Zm00001d028372";
1	StringTie	exon	32439446	32439571	1000	-	.	gene_id "MSTRG.1019"; transcript_id "Zm00001d028372_T009"; exon_number "4"; gene_name "bZIP-transcription factor 115"; ref_gene_id "Zm00001d028372";
1	StringTie	transcript	32438646	32439571	1000	-	.	gene_id "MSTRG.1019"; transcript_id "Zm00001d028372_T012"; gene_name "bZIP-transcription factor 115"; ref_gene_id "Zm00001d028372";
1	StringTie	exon	32438646	32438666	1000	-	.	gene_id "MSTRG.1019"; transcript_id "Zm00001d028372_T012"; exon_number "1"; gene_name "bZIP-transcription factor 115"; ref_gene_id "Zm00001d028372";
1	StringTie	exon	32439106	32439207	1000	-	.	gene_id "MSTRG.1019"; transcript_id "Zm00001d028372_T012"; exon_number "2"; gene_name "bZIP-transcription factor 115"; ref_gene_id "Zm00001d028372";
1	StringTie	exon	32439290	32439349	1000	-	.	gene_id "MSTRG.1019"; transcript_id "Zm00001d028372_T012"; exon_number "3"; gene_name "bZIP-transcription factor 115"; ref_gene_id "Zm00001d028372";
1	StringTie	exon	32439446	32439571	1000	-	.	gene_id "MSTRG.1019"; transcript_id "Zm00001d028372_T012"; exon_number "4"; gene_name "bZIP-transcription factor 115"; ref_gene_id "Zm00001d028372";
1	StringTie	transcript	32439070	32439571	1000	-	.	gene_id "MSTRG.1019"; transcript_id "Zm00001d028372_T016"; gene_name "bZIP-transcription factor 115"; ref_gene_id "Zm00001d028372";
1	StringTie	exon	32439070	32439207	1000	-	.	gene_id "MSTRG.1019"; transcript_id "Zm00001d028372_T016"; exon_number "1"; gene_name "bZIP-transcription factor 115"; ref_gene_id "Zm00001d028372";
1	StringTie	exon	32439290	32439349	1000	-	.	gene_id "MSTRG.1019"; transcript_id "Zm00001d028372_T016"; exon_number "2"; gene_name "bZIP-transcription factor 115"; ref_gene_id "Zm00001d028372";
1	StringTie	exon	32439446	32439571	1000	-	.	gene_id "MSTRG.1019"; transcript_id "Zm00001d028372_T016"; exon_number "3"; gene_name "bZIP-transcription factor 115"; ref_gene_id "Zm00001d028372";
1	StringTie	transcript	32472448	32472807	1000	-	.	gene_id "MSTRG.1020"; transcript_id "Zm00001d028373_T010"; gene_name "translocon of outer membrane of chloroplast35"; ref_gene_id "Zm00001d028373";
1	StringTie	exon	32472448	32472600	1000	-	.	gene_id "MSTRG.1020"; transcript_id "Zm00001d028373_T010"; exon_number "1"; gene_name "translocon of outer membrane of chloroplast35"; ref_gene_id "Zm00001d028373";
1	StringTie	exon	32472682	32472807	1000	-	.	gene_id "MSTRG.1020"; transcript_id "Zm00001d028373_T010"; exon_number "2"; gene_name "translocon of outer membrane of chloroplast35"; ref_gene_id "Zm00001d028373";
1	StringTie	transcript	32472448	32477965	1000	-	.	gene_id "MSTRG.1020"; transcript_id "Zm00001d028373_T012"; gene_name "translocon of outer membrane of chloroplast35"; ref_gene_id "Zm00001d028373";
1	StringTie	exon	32472448	32472600	1000	-	.	gene_id "MSTRG.1020"; transcript_id "Zm00001d028373_T012"; exon_number "1"; gene_name "translocon of outer membrane of chloroplast35"; ref_gene_id "Zm00001d028373";
1	StringTie	exon	32472682	32472807	1000	-	.	gene_id "MSTRG.1020"; transcript_id "Zm00001d028373_T012"; exon_number "2"; gene_name "translocon of outer membrane of chloroplast35"; ref_gene_id "Zm00001d028373";
1	StringTie	exon	32477783	32477965	1000	-	.	gene_id "MSTRG.1020"; transcript_id "Zm00001d028373_T012"; exon_number "3"; gene_name "translocon of outer membrane of chloroplast35"; ref_gene_id "Zm00001d028373";
1	StringTie	transcript	32472585	32477965	1000	-	.	gene_id "MSTRG.1020"; transcript_id "Zm00001d028373_T003"; gene_name "translocon of outer membrane of chloroplast35"; ref_gene_id "Zm00001d028373";
1	StringTie	exon	32472585	32472645	1000	-	.	gene_id "MSTRG.1020"; transcript_id "Zm00001d028373_T003"; exon_number "1"; gene_name "translocon of outer membrane of chloroplast35"; ref_gene_id "Zm00001d028373";
1	StringTie	exon	32472686	32472807	1000	-	.	gene_id "MSTRG.1020"; transcript_id "Zm00001d028373_T003"; exon_number "2"; gene_name "translocon of outer membrane of chloroplast35"; ref_gene_id "Zm00001d028373";
1	StringTie	exon	32477783	32477965	1000	-	.	gene_id "MSTRG.1020"; transcript_id "Zm00001d028373_T003"; exon_number "3"; gene_name "translocon of outer membrane of chloroplast35"; ref_gene_id "Zm00001d028373";
1	StringTie	transcript	32472649	32472807	1000	-	.	gene_id "MSTRG.1020"; transcript_id "Zm00001d028373_T011"; gene_name "translocon of outer membrane of chloroplast35"; ref_gene_id "Zm00001d028373";
1	StringTie	exon	32472649	32472807	1000	-	.	gene_id "MSTRG.1020"; transcript_id "Zm00001d028373_T011"; exon_number "1"; gene_name "translocon of outer membrane of chloroplast35"; ref_gene_id "Zm00001d028373";
1	StringTie	transcript	32604029	32606650	1000	-	.	gene_id "MSTRG.1022"; transcript_id "Zm00001d028375_T005"; gene_name "Zm00001d028375"; ref_gene_id "Zm00001d028375";
1	StringTie	exon	32604029	32604107	1000	-	.	gene_id "MSTRG.1022"; transcript_id "Zm00001d028375_T005"; exon_number "1"; gene_name "Zm00001d028375"; ref_gene_id "Zm00001d028375";
1	StringTie	exon	32604204	32604259	1000	-	.	gene_id "MSTRG.1022"; transcript_id "Zm00001d028375_T005"; exon_number "2"; gene_name "Zm00001d028375"; ref_gene_id "Zm00001d028375";
1	StringTie	exon	32606063	32606157	1000	-	.	gene_id "MSTRG.1022"; transcript_id "Zm00001d028375_T005"; exon_number "3"; gene_name "Zm00001d028375"; ref_gene_id "Zm00001d028375";
1	StringTie	exon	32606255	32606650	1000	-	.	gene_id "MSTRG.1022"; transcript_id "Zm00001d028375_T005"; exon_number "4"; gene_name "Zm00001d028375"; ref_gene_id "Zm00001d028375";
1	StringTie	transcript	32604029	32606650	1000	-	.	gene_id "MSTRG.1022"; transcript_id "Zm00001d028375_T006"; gene_name "Zm00001d028375"; ref_gene_id "Zm00001d028375";
1	StringTie	exon	32604029	32604160	1000	-	.	gene_id "MSTRG.1022"; transcript_id "Zm00001d028375_T006"; exon_number "1"; gene_name "Zm00001d028375"; ref_gene_id "Zm00001d028375";
1	StringTie	exon	32604199	32604240	1000	-	.	gene_id "MSTRG.1022"; transcript_id "Zm00001d028375_T006"; exon_number "2"; gene_name "Zm00001d028375"; ref_gene_id "Zm00001d028375";
1	StringTie	exon	32606063	32606157	1000	-	.	gene_id "MSTRG.1022"; transcript_id "Zm00001d028375_T006"; exon_number "3"; gene_name "Zm00001d028375"; ref_gene_id "Zm00001d028375";
1	StringTie	exon	32606255	32606650	1000	-	.	gene_id "MSTRG.1022"; transcript_id "Zm00001d028375_T006"; exon_number "4"; gene_name "Zm00001d028375"; ref_gene_id "Zm00001d028375";
1	StringTie	transcript	32606063	32606650	1000	-	.	gene_id "MSTRG.1022"; transcript_id "Zm00001d028375_T004"; gene_name "Zm00001d028375"; ref_gene_id "Zm00001d028375";
1	StringTie	exon	32606063	32606157	1000	-	.	gene_id "MSTRG.1022"; transcript_id "Zm00001d028375_T004"; exon_number "1"; gene_name "Zm00001d028375"; ref_gene_id "Zm00001d028375";
1	StringTie	exon	32606255	32606650	1000	-	.	gene_id "MSTRG.1022"; transcript_id "Zm00001d028375_T004"; exon_number "2"; gene_name "Zm00001d028375"; ref_gene_id "Zm00001d028375";
1	StringTie	transcript	32802585	32804150	1000	+	.	gene_id "MSTRG.1028"; transcript_id "Zm00001d028384_T005"; gene_name "Zm00001d028384"; ref_gene_id "Zm00001d028384";
1	StringTie	exon	32802585	32802647	1000	+	.	gene_id "MSTRG.1028"; transcript_id "Zm00001d028384_T005"; exon_number "1"; gene_name "Zm00001d028384"; ref_gene_id "Zm00001d028384";
1	StringTie	exon	32803606	32803737	1000	+	.	gene_id "MSTRG.1028"; transcript_id "Zm00001d028384_T005"; exon_number "2"; gene_name "Zm00001d028384"; ref_gene_id "Zm00001d028384";
1	StringTie	exon	32803899	32804150	1000	+	.	gene_id "MSTRG.1028"; transcript_id "Zm00001d028384_T005"; exon_number "3"; gene_name "Zm00001d028384"; ref_gene_id "Zm00001d028384";
1	StringTie	transcript	33305941	33306895	1000	-	.	gene_id "MSTRG.1039"; transcript_id "Zm00001d028396_T004"; gene_name "Zm00001d028396"; ref_gene_id "Zm00001d028396";
1	StringTie	exon	33305941	33306895	1000	-	.	gene_id "MSTRG.1039"; transcript_id "Zm00001d028396_T004"; exon_number "1"; gene_name "Zm00001d028396"; ref_gene_id "Zm00001d028396";
1	StringTie	transcript	33442225	33446874	1000	+	.	gene_id "MSTRG.1040"; transcript_id "Zm00001d028397_T009"; gene_name "Zm00001d028397"; ref_gene_id "Zm00001d028397";
1	StringTie	exon	33442225	33442503	1000	+	.	gene_id "MSTRG.1040"; transcript_id "Zm00001d028397_T009"; exon_number "1"; gene_name "Zm00001d028397"; ref_gene_id "Zm00001d028397";
1	StringTie	exon	33445370	33445498	1000	+	.	gene_id "MSTRG.1040"; transcript_id "Zm00001d028397_T009"; exon_number "2"; gene_name "Zm00001d028397"; ref_gene_id "Zm00001d028397";
1	StringTie	exon	33445620	33445702	1000	+	.	gene_id "MSTRG.1040"; transcript_id "Zm00001d028397_T009"; exon_number "3"; gene_name "Zm00001d028397"; ref_gene_id "Zm00001d028397";
1	StringTie	exon	33446233	33446874	1000	+	.	gene_id "MSTRG.1040"; transcript_id "Zm00001d028397_T009"; exon_number "4"; gene_name "Zm00001d028397"; ref_gene_id "Zm00001d028397";
1	StringTie	transcript	33445370	33448136	1000	+	.	gene_id "MSTRG.1040"; transcript_id "Zm00001d028397_T003"; gene_name "Zm00001d028397"; ref_gene_id "Zm00001d028397";
1	StringTie	exon	33445370	33445498	1000	+	.	gene_id "MSTRG.1040"; transcript_id "Zm00001d028397_T003"; exon_number "1"; gene_name "Zm00001d028397"; ref_gene_id "Zm00001d028397";
1	StringTie	exon	33445620	33445702	1000	+	.	gene_id "MSTRG.1040"; transcript_id "Zm00001d028397_T003"; exon_number "2"; gene_name "Zm00001d028397"; ref_gene_id "Zm00001d028397";
1	StringTie	exon	33446233	33446294	1000	+	.	gene_id "MSTRG.1040"; transcript_id "Zm00001d028397_T003"; exon_number "3"; gene_name "Zm00001d028397"; ref_gene_id "Zm00001d028397";
1	StringTie	exon	33447712	33448136	1000	+	.	gene_id "MSTRG.1040"; transcript_id "Zm00001d028397_T003"; exon_number "4"; gene_name "Zm00001d028397"; ref_gene_id "Zm00001d028397";
1	StringTie	transcript	33451651	33451846	1000	+	.	gene_id "MSTRG.1041"; transcript_id "Zm00001d028398_T007"; gene_name "Zm00001d028398"; ref_gene_id "Zm00001d028398";
1	StringTie	exon	33451651	33451846	1000	+	.	gene_id "MSTRG.1041"; transcript_id "Zm00001d028398_T007"; exon_number "1"; gene_name "Zm00001d028398"; ref_gene_id "Zm00001d028398";
1	StringTie	transcript	33597252	33597445	1000	+	.	gene_id "MSTRG.1044"; transcript_id "Zm00001d028400_T001"; gene_name "Zm00001d028400"; ref_gene_id "Zm00001d028400";
1	StringTie	exon	33597252	33597315	1000	+	.	gene_id "MSTRG.1044"; transcript_id "Zm00001d028400_T001"; exon_number "1"; gene_name "Zm00001d028400"; ref_gene_id "Zm00001d028400";
1	StringTie	exon	33597379	33597445	1000	+	.	gene_id "MSTRG.1044"; transcript_id "Zm00001d028400_T001"; exon_number "2"; gene_name "Zm00001d028400"; ref_gene_id "Zm00001d028400";
1	StringTie	transcript	33599985	33600132	1000	+	.	gene_id "MSTRG.1044"; transcript_id "Zm00001d028400_T004"; gene_name "Zm00001d028400"; ref_gene_id "Zm00001d028400";
1	StringTie	exon	33599985	33600132	1000	+	.	gene_id "MSTRG.1044"; transcript_id "Zm00001d028400_T004"; exon_number "1"; gene_name "Zm00001d028400"; ref_gene_id "Zm00001d028400";
1	StringTie	transcript	33744934	33745616	1000	-	.	gene_id "MSTRG.1049"; transcript_id "Zm00001d028405_T001"; gene_name "Zm00001d028405"; ref_gene_id "Zm00001d028405";
1	StringTie	exon	33744934	33745113	1000	-	.	gene_id "MSTRG.1049"; transcript_id "Zm00001d028405_T001"; exon_number "1"; gene_name "Zm00001d028405"; ref_gene_id "Zm00001d028405";
1	StringTie	exon	33745183	33745616	1000	-	.	gene_id "MSTRG.1049"; transcript_id "Zm00001d028405_T001"; exon_number "2"; gene_name "Zm00001d028405"; ref_gene_id "Zm00001d028405";
1	StringTie	transcript	33850678	33850740	1000	-	.	gene_id "MSTRG.1053"; transcript_id "Zm00001d028410_T001"; gene_name "Zm00001d028410"; ref_gene_id "Zm00001d028410";
1	StringTie	exon	33850678	33850740	1000	-	.	gene_id "MSTRG.1053"; transcript_id "Zm00001d028410_T001"; exon_number "1"; gene_name "Zm00001d028410"; ref_gene_id "Zm00001d028410";
1	StringTie	transcript	34033370	34033568	1000	+	.	gene_id "MSTRG.1054"; transcript_id "Zm00001d028412_T016"; gene_name "Zm00001d028412"; ref_gene_id "Zm00001d028412";
1	StringTie	exon	34033370	34033568	1000	+	.	gene_id "MSTRG.1054"; transcript_id "Zm00001d028412_T016"; exon_number "1"; gene_name "Zm00001d028412"; ref_gene_id "Zm00001d028412";
1	StringTie	transcript	34033370	34033818	1000	+	.	gene_id "MSTRG.1054"; transcript_id "Zm00001d028412_T017"; gene_name "Zm00001d028412"; ref_gene_id "Zm00001d028412";
1	StringTie	exon	34033370	34033459	1000	+	.	gene_id "MSTRG.1054"; transcript_id "Zm00001d028412_T017"; exon_number "1"; gene_name "Zm00001d028412"; ref_gene_id "Zm00001d028412";
1	StringTie	exon	34033617	34033818	1000	+	.	gene_id "MSTRG.1054"; transcript_id "Zm00001d028412_T017"; exon_number "2"; gene_name "Zm00001d028412"; ref_gene_id "Zm00001d028412";
1	StringTie	transcript	34033370	34033616	1000	+	.	gene_id "MSTRG.1054"; transcript_id "Zm00001d028412_T014"; gene_name "Zm00001d028412"; ref_gene_id "Zm00001d028412";
1	StringTie	exon	34033370	34033459	1000	+	.	gene_id "MSTRG.1054"; transcript_id "Zm00001d028412_T014"; exon_number "1"; gene_name "Zm00001d028412"; ref_gene_id "Zm00001d028412";
1	StringTie	exon	34033569	34033616	1000	+	.	gene_id "MSTRG.1054"; transcript_id "Zm00001d028412_T014"; exon_number "2"; gene_name "Zm00001d028412"; ref_gene_id "Zm00001d028412";
1	StringTie	transcript	34033370	34033568	1000	+	.	gene_id "MSTRG.1054"; transcript_id "Zm00001d028412_T011"; gene_name "Zm00001d028412"; ref_gene_id "Zm00001d028412";
1	StringTie	exon	34033370	34033459	1000	+	.	gene_id "MSTRG.1054"; transcript_id "Zm00001d028412_T011"; exon_number "1"; gene_name "Zm00001d028412"; ref_gene_id "Zm00001d028412";
1	StringTie	exon	34033490	34033568	1000	+	.	gene_id "MSTRG.1054"; transcript_id "Zm00001d028412_T011"; exon_number "2"; gene_name "Zm00001d028412"; ref_gene_id "Zm00001d028412";
1	StringTie	transcript	34037104	34037443	1000	+	.	gene_id "MSTRG.1054"; transcript_id "Zm00001d028412_T055"; gene_name "Zm00001d028412"; ref_gene_id "Zm00001d028412";
1	StringTie	exon	34037104	34037443	1000	+	.	gene_id "MSTRG.1054"; transcript_id "Zm00001d028412_T055"; exon_number "1"; gene_name "Zm00001d028412"; ref_gene_id "Zm00001d028412";
1	StringTie	transcript	34138497	34141436	1000	-	.	gene_id "MSTRG.1056"; transcript_id "Zm00001d028414_T004"; gene_name "Zm00001d028414"; ref_gene_id "Zm00001d028414";
1	StringTie	exon	34138497	34138529	1000	-	.	gene_id "MSTRG.1056"; transcript_id "Zm00001d028414_T004"; exon_number "1"; gene_name "Zm00001d028414"; ref_gene_id "Zm00001d028414";
1	StringTie	exon	34138620	34138747	1000	-	.	gene_id "MSTRG.1056"; transcript_id "Zm00001d028414_T004"; exon_number "2"; gene_name "Zm00001d028414"; ref_gene_id "Zm00001d028414";
1	StringTie	exon	34141257	34141436	1000	-	.	gene_id "MSTRG.1056"; transcript_id "Zm00001d028414_T004"; exon_number "3"; gene_name "Zm00001d028414"; ref_gene_id "Zm00001d028414";
1	StringTie	transcript	34542604	34545202	1000	+	.	gene_id "MSTRG.1064"; transcript_id "Zm00001d028424_T007"; gene_name "Zm00001d028424"; ref_gene_id "Zm00001d028424";
1	StringTie	exon	34542604	34542879	1000	+	.	gene_id "MSTRG.1064"; transcript_id "Zm00001d028424_T007"; exon_number "1"; gene_name "Zm00001d028424"; ref_gene_id "Zm00001d028424";
1	StringTie	exon	34544801	34544866	1000	+	.	gene_id "MSTRG.1064"; transcript_id "Zm00001d028424_T007"; exon_number "2"; gene_name "Zm00001d028424"; ref_gene_id "Zm00001d028424";
1	StringTie	exon	34545073	34545202	1000	+	.	gene_id "MSTRG.1064"; transcript_id "Zm00001d028424_T007"; exon_number "3"; gene_name "Zm00001d028424"; ref_gene_id "Zm00001d028424";
1	StringTie	transcript	34592201	34593136	1000	+	.	gene_id "MSTRG.1065"; transcript_id "Zm00001d028425_T009"; gene_name "Zm00001d028425"; ref_gene_id "Zm00001d028425";
1	StringTie	exon	34592201	34592311	1000	+	.	gene_id "MSTRG.1065"; transcript_id "Zm00001d028425_T009"; exon_number "1"; gene_name "Zm00001d028425"; ref_gene_id "Zm00001d028425";
1	StringTie	exon	34592400	34592445	1000	+	.	gene_id "MSTRG.1065"; transcript_id "Zm00001d028425_T009"; exon_number "2"; gene_name "Zm00001d028425"; ref_gene_id "Zm00001d028425";
1	StringTie	exon	34592527	34593136	1000	+	.	gene_id "MSTRG.1065"; transcript_id "Zm00001d028425_T009"; exon_number "3"; gene_name "Zm00001d028425"; ref_gene_id "Zm00001d028425";
1	StringTie	transcript	34592400	34593136	1000	+	.	gene_id "MSTRG.1065"; transcript_id "Zm00001d028425_T006"; gene_name "Zm00001d028425"; ref_gene_id "Zm00001d028425";
1	StringTie	exon	34592400	34593136	1000	+	.	gene_id "MSTRG.1065"; transcript_id "Zm00001d028425_T006"; exon_number "1"; gene_name "Zm00001d028425"; ref_gene_id "Zm00001d028425";
1	StringTie	transcript	34960116	34960750	1000	+	.	gene_id "MSTRG.1074"; transcript_id "Zm00001d028436_T002"; gene_name "Zm00001d028436"; ref_gene_id "Zm00001d028436";
1	StringTie	exon	34960116	34960252	1000	+	.	gene_id "MSTRG.1074"; transcript_id "Zm00001d028436_T002"; exon_number "1"; gene_name "Zm00001d028436"; ref_gene_id "Zm00001d028436";
1	StringTie	exon	34960706	34960750	1000	+	.	gene_id "MSTRG.1074"; transcript_id "Zm00001d028436_T002"; exon_number "2"; gene_name "Zm00001d028436"; ref_gene_id "Zm00001d028436";
1	StringTie	transcript	34970836	34974646	1000	+	.	gene_id "MSTRG.1076"; transcript_id "Zm00001d028438_T016"; gene_name "Zm00001d028438"; ref_gene_id "Zm00001d028438";
1	StringTie	exon	34970836	34971005	1000	+	.	gene_id "MSTRG.1076"; transcript_id "Zm00001d028438_T016"; exon_number "1"; gene_name "Zm00001d028438"; ref_gene_id "Zm00001d028438";
1	StringTie	exon	34974329	34974646	1000	+	.	gene_id "MSTRG.1076"; transcript_id "Zm00001d028438_T016"; exon_number "2"; gene_name "Zm00001d028438"; ref_gene_id "Zm00001d028438";
1	StringTie	transcript	35472997	35476235	1000	-	.	gene_id "MSTRG.1087"; transcript_id "Zm00001d028453_T004"; gene_name "Zm00001d028453"; ref_gene_id "Zm00001d028453";
1	StringTie	exon	35472997	35473072	1000	-	.	gene_id "MSTRG.1087"; transcript_id "Zm00001d028453_T004"; exon_number "1"; gene_name "Zm00001d028453"; ref_gene_id "Zm00001d028453";
1	StringTie	exon	35474586	35474733	1000	-	.	gene_id "MSTRG.1087"; transcript_id "Zm00001d028453_T004"; exon_number "2"; gene_name "Zm00001d028453"; ref_gene_id "Zm00001d028453";
1	StringTie	exon	35476014	35476235	1000	-	.	gene_id "MSTRG.1087"; transcript_id "Zm00001d028453_T004"; exon_number "3"; gene_name "Zm00001d028453"; ref_gene_id "Zm00001d028453";
1	StringTie	transcript	35473082	35476235	1000	-	.	gene_id "MSTRG.1087"; transcript_id "Zm00001d028453_T005"; gene_name "Zm00001d028453"; ref_gene_id "Zm00001d028453";
1	StringTie	exon	35473082	35473082	1000	-	.	gene_id "MSTRG.1087"; transcript_id "Zm00001d028453_T005"; exon_number "1"; gene_name "Zm00001d028453"; ref_gene_id "Zm00001d028453";
1	StringTie	exon	35474586	35474733	1000	-	.	gene_id "MSTRG.1087"; transcript_id "Zm00001d028453_T005"; exon_number "2"; gene_name "Zm00001d028453"; ref_gene_id "Zm00001d028453";
1	StringTie	exon	35476014	35476235	1000	-	.	gene_id "MSTRG.1087"; transcript_id "Zm00001d028453_T005"; exon_number "3"; gene_name "Zm00001d028453"; ref_gene_id "Zm00001d028453";
1	StringTie	transcript	35474585	35476235	1000	-	.	gene_id "MSTRG.1087"; transcript_id "Zm00001d028453_T003"; gene_name "Zm00001d028453"; ref_gene_id "Zm00001d028453";
1	StringTie	exon	35474585	35474733	1000	-	.	gene_id "MSTRG.1087"; transcript_id "Zm00001d028453_T003"; exon_number "1"; gene_name "Zm00001d028453"; ref_gene_id "Zm00001d028453";
1	StringTie	exon	35476014	35476235	1000	-	.	gene_id "MSTRG.1087"; transcript_id "Zm00001d028453_T003"; exon_number "2"; gene_name "Zm00001d028453"; ref_gene_id "Zm00001d028453";
1	StringTie	transcript	35511389	35511664	1000	-	.	gene_id "MSTRG.1092"; transcript_id "Zm00001d028458_T001"; gene_name "Zm00001d028458"; ref_gene_id "Zm00001d028458";
1	StringTie	exon	35511389	35511664	1000	-	.	gene_id "MSTRG.1092"; transcript_id "Zm00001d028458_T001"; exon_number "1"; gene_name "Zm00001d028458"; ref_gene_id "Zm00001d028458";
1	StringTie	transcript	35722361	35737281	1000	+	.	gene_id "MSTRG.1096"; transcript_id "Zm00001d028464_T020"; gene_name "Zm00001d028464"; ref_gene_id "Zm00001d028464";
1	StringTie	exon	35722361	35722396	1000	+	.	gene_id "MSTRG.1096"; transcript_id "Zm00001d028464_T020"; exon_number "1"; gene_name "Zm00001d028464"; ref_gene_id "Zm00001d028464";
1	StringTie	exon	35722876	35723010	1000	+	.	gene_id "MSTRG.1096"; transcript_id "Zm00001d028464_T020"; exon_number "2"; gene_name "Zm00001d028464"; ref_gene_id "Zm00001d028464";
1	StringTie	exon	35723612	35723648	1000	+	.	gene_id "MSTRG.1096"; transcript_id "Zm00001d028464_T020"; exon_number "3"; gene_name "Zm00001d028464"; ref_gene_id "Zm00001d028464";
1	StringTie	exon	35737135	35737281	1000	+	.	gene_id "MSTRG.1096"; transcript_id "Zm00001d028464_T020"; exon_number "4"; gene_name "Zm00001d028464"; ref_gene_id "Zm00001d028464";
1	StringTie	transcript	35767182	35767573	1000	+	.	gene_id "MSTRG.1096"; transcript_id "Zm00001d028464_T030"; gene_name "Zm00001d028464"; ref_gene_id "Zm00001d028464";
1	StringTie	exon	35767182	35767229	1000	+	.	gene_id "MSTRG.1096"; transcript_id "Zm00001d028464_T030"; exon_number "1"; gene_name "Zm00001d028464"; ref_gene_id "Zm00001d028464";
1	StringTie	exon	35767365	35767573	1000	+	.	gene_id "MSTRG.1096"; transcript_id "Zm00001d028464_T030"; exon_number "2"; gene_name "Zm00001d028464"; ref_gene_id "Zm00001d028464";
1	StringTie	transcript	35780643	35785612	1000	+	.	gene_id "MSTRG.1096"; transcript_id "Zm00001d028464_T043"; gene_name "Zm00001d028464"; ref_gene_id "Zm00001d028464";
1	StringTie	exon	35780643	35780774	1000	+	.	gene_id "MSTRG.1096"; transcript_id "Zm00001d028464_T043"; exon_number "1"; gene_name "Zm00001d028464"; ref_gene_id "Zm00001d028464";
1	StringTie	exon	35785262	35785612	1000	+	.	gene_id "MSTRG.1096"; transcript_id "Zm00001d028464_T043"; exon_number "2"; gene_name "Zm00001d028464"; ref_gene_id "Zm00001d028464";
1	StringTie	transcript	36142467	36143726	1000	+	.	gene_id "MSTRG.1105"; transcript_id "Zm00001d028474_T022"; gene_name "Zm00001d028474"; ref_gene_id "Zm00001d028474";
1	StringTie	exon	36142467	36142553	1000	+	.	gene_id "MSTRG.1105"; transcript_id "Zm00001d028474_T022"; exon_number "1"; gene_name "Zm00001d028474"; ref_gene_id "Zm00001d028474";
1	StringTie	exon	36142706	36142837	1000	+	.	gene_id "MSTRG.1105"; transcript_id "Zm00001d028474_T022"; exon_number "2"; gene_name "Zm00001d028474"; ref_gene_id "Zm00001d028474";
1	StringTie	exon	36143318	36143726	1000	+	.	gene_id "MSTRG.1105"; transcript_id "Zm00001d028474_T022"; exon_number "3"; gene_name "Zm00001d028474"; ref_gene_id "Zm00001d028474";
1	StringTie	transcript	36146133	36146643	1000	+	.	gene_id "MSTRG.1105"; transcript_id "Zm00001d028474_T023"; gene_name "Zm00001d028474"; ref_gene_id "Zm00001d028474";
1	StringTie	exon	36146133	36146643	1000	+	.	gene_id "MSTRG.1105"; transcript_id "Zm00001d028474_T023"; exon_number "1"; gene_name "Zm00001d028474"; ref_gene_id "Zm00001d028474";
1	StringTie	transcript	36683708	36683864	1000	+	.	gene_id "MSTRG.1113"; transcript_id "Zm00001d028485_T004"; gene_name "Zm00001d028485"; ref_gene_id "Zm00001d028485";
1	StringTie	exon	36683708	36683864	1000	+	.	gene_id "MSTRG.1113"; transcript_id "Zm00001d028485_T004"; exon_number "1"; gene_name "Zm00001d028485"; ref_gene_id "Zm00001d028485";
1	StringTie	transcript	36894511	36894888	1000	-	.	gene_id "MSTRG.1118"; transcript_id "Zm00001d028493_T001"; gene_name "Zm00001d028493"; ref_gene_id "Zm00001d028493";
1	StringTie	exon	36894511	36894888	1000	-	.	gene_id "MSTRG.1118"; transcript_id "Zm00001d028493_T001"; exon_number "1"; gene_name "Zm00001d028493"; ref_gene_id "Zm00001d028493";
1	StringTie	transcript	37766233	37767521	1000	+	.	gene_id "MSTRG.1136"; transcript_id "Zm00001d028513_T004"; gene_name "Zm00001d028513"; ref_gene_id "Zm00001d028513";
1	StringTie	exon	37766233	37766238	1000	+	.	gene_id "MSTRG.1136"; transcript_id "Zm00001d028513_T004"; exon_number "1"; gene_name "Zm00001d028513"; ref_gene_id "Zm00001d028513";
1	StringTie	exon	37767360	37767521	1000	+	.	gene_id "MSTRG.1136"; transcript_id "Zm00001d028513_T004"; exon_number "2"; gene_name "Zm00001d028513"; ref_gene_id "Zm00001d028513";
1	StringTie	transcript	37767450	37767521	1000	+	.	gene_id "MSTRG.1136"; transcript_id "Zm00001d028513_T003"; gene_name "Zm00001d028513"; ref_gene_id "Zm00001d028513";
1	StringTie	exon	37767450	37767521	1000	+	.	gene_id "MSTRG.1136"; transcript_id "Zm00001d028513_T003"; exon_number "1"; gene_name "Zm00001d028513"; ref_gene_id "Zm00001d028513";
1	StringTie	transcript	38255420	38255758	1000	-	.	gene_id "MSTRG.1151"; transcript_id "Zm00001d028529_T002"; gene_name "Zm00001d028529"; ref_gene_id "Zm00001d028529";
1	StringTie	exon	38255420	38255758	1000	-	.	gene_id "MSTRG.1151"; transcript_id "Zm00001d028529_T002"; exon_number "1"; gene_name "Zm00001d028529"; ref_gene_id "Zm00001d028529";
1	StringTie	transcript	38320899	38323024	1000	+	.	gene_id "MSTRG.1152"; transcript_id "Zm00001d028530_T001"; gene_name "Zm00001d028530"; ref_gene_id "Zm00001d028530";
1	StringTie	exon	38320899	38320981	1000	+	.	gene_id "MSTRG.1152"; transcript_id "Zm00001d028530_T001"; exon_number "1"; gene_name "Zm00001d028530"; ref_gene_id "Zm00001d028530";
1	StringTie	exon	38321850	38323024	1000	+	.	gene_id "MSTRG.1152"; transcript_id "Zm00001d028530_T001"; exon_number "2"; gene_name "Zm00001d028530"; ref_gene_id "Zm00001d028530";
1	StringTie	transcript	38450297	38454368	1000	-	.	gene_id "MSTRG.1156"; transcript_id "Zm00001d028534_T001"; gene_name "Zm00001d028534"; ref_gene_id "Zm00001d028534";
1	StringTie	exon	38450297	38450316	1000	-	.	gene_id "MSTRG.1156"; transcript_id "Zm00001d028534_T001"; exon_number "1"; gene_name "Zm00001d028534"; ref_gene_id "Zm00001d028534";
1	StringTie	exon	38450760	38450938	1000	-	.	gene_id "MSTRG.1156"; transcript_id "Zm00001d028534_T001"; exon_number "2"; gene_name "Zm00001d028534"; ref_gene_id "Zm00001d028534";
1	StringTie	exon	38453278	38454368	1000	-	.	gene_id "MSTRG.1156"; transcript_id "Zm00001d028534_T001"; exon_number "3"; gene_name "Zm00001d028534"; ref_gene_id "Zm00001d028534";
1	StringTie	transcript	38450728	38454368	1000	-	.	gene_id "MSTRG.1156"; transcript_id "Zm00001d028534_T007"; gene_name "Zm00001d028534"; ref_gene_id "Zm00001d028534";
1	StringTie	exon	38450728	38450938	1000	-	.	gene_id "MSTRG.1156"; transcript_id "Zm00001d028534_T007"; exon_number "1"; gene_name "Zm00001d028534"; ref_gene_id "Zm00001d028534";
1	StringTie	exon	38453278	38454368	1000	-	.	gene_id "MSTRG.1156"; transcript_id "Zm00001d028534_T007"; exon_number "2"; gene_name "Zm00001d028534"; ref_gene_id "Zm00001d028534";
1	StringTie	transcript	38456661	38457129	1000	-	.	gene_id "MSTRG.1156"; transcript_id "Zm00001d028534_T009"; gene_name "Zm00001d028534"; ref_gene_id "Zm00001d028534";
1	StringTie	exon	38456661	38457129	1000	-	.	gene_id "MSTRG.1156"; transcript_id "Zm00001d028534_T009"; exon_number "1"; gene_name "Zm00001d028534"; ref_gene_id "Zm00001d028534";
1	StringTie	transcript	38516722	38517828	1000	+	.	gene_id "MSTRG.1157"; transcript_id "Zm00001d028535_T002"; gene_name "Zm00001d028535"; ref_gene_id "Zm00001d028535";
1	StringTie	exon	38516722	38516812	1000	+	.	gene_id "MSTRG.1157"; transcript_id "Zm00001d028535_T002"; exon_number "1"; gene_name "Zm00001d028535"; ref_gene_id "Zm00001d028535";
1	StringTie	exon	38517565	38517828	1000	+	.	gene_id "MSTRG.1157"; transcript_id "Zm00001d028535_T002"; exon_number "2"; gene_name "Zm00001d028535"; ref_gene_id "Zm00001d028535";
1	StringTie	transcript	38522383	38523632	1000	-	.	gene_id "MSTRG.1158"; transcript_id "Zm00001d028536_T004"; gene_name "Zm00001d028536"; ref_gene_id "Zm00001d028536";
1	StringTie	exon	38522383	38522505	1000	-	.	gene_id "MSTRG.1158"; transcript_id "Zm00001d028536_T004"; exon_number "1"; gene_name "Zm00001d028536"; ref_gene_id "Zm00001d028536";
1	StringTie	exon	38523552	38523632	1000	-	.	gene_id "MSTRG.1158"; transcript_id "Zm00001d028536_T004"; exon_number "2"; gene_name "Zm00001d028536"; ref_gene_id "Zm00001d028536";
1	StringTie	transcript	38524441	38524890	1000	-	.	gene_id "MSTRG.1158"; transcript_id "Zm00001d028536_T007"; gene_name "Zm00001d028536"; ref_gene_id "Zm00001d028536";
1	StringTie	exon	38524441	38524693	1000	-	.	gene_id "MSTRG.1158"; transcript_id "Zm00001d028536_T007"; exon_number "1"; gene_name "Zm00001d028536"; ref_gene_id "Zm00001d028536";
1	StringTie	exon	38524775	38524890	1000	-	.	gene_id "MSTRG.1158"; transcript_id "Zm00001d028536_T007"; exon_number "2"; gene_name "Zm00001d028536"; ref_gene_id "Zm00001d028536";
1	StringTie	transcript	38586726	38587923	1000	-	.	gene_id "MSTRG.1160"; transcript_id "Zm00001d028538_T017"; gene_name "Zm00001d028538"; ref_gene_id "Zm00001d028538";
1	StringTie	exon	38586726	38586782	1000	-	.	gene_id "MSTRG.1160"; transcript_id "Zm00001d028538_T017"; exon_number "1"; gene_name "Zm00001d028538"; ref_gene_id "Zm00001d028538";
1	StringTie	exon	38587450	38587555	1000	-	.	gene_id "MSTRG.1160"; transcript_id "Zm00001d028538_T017"; exon_number "2"; gene_name "Zm00001d028538"; ref_gene_id "Zm00001d028538";
1	StringTie	exon	38587658	38587923	1000	-	.	gene_id "MSTRG.1160"; transcript_id "Zm00001d028538_T017"; exon_number "3"; gene_name "Zm00001d028538"; ref_gene_id "Zm00001d028538";
1	StringTie	transcript	38587408	38587923	1000	-	.	gene_id "MSTRG.1160"; transcript_id "Zm00001d028538_T020"; gene_name "Zm00001d028538"; ref_gene_id "Zm00001d028538";
1	StringTie	exon	38587408	38587555	1000	-	.	gene_id "MSTRG.1160"; transcript_id "Zm00001d028538_T020"; exon_number "1"; gene_name "Zm00001d028538"; ref_gene_id "Zm00001d028538";
1	StringTie	exon	38587658	38587923	1000	-	.	gene_id "MSTRG.1160"; transcript_id "Zm00001d028538_T020"; exon_number "2"; gene_name "Zm00001d028538"; ref_gene_id "Zm00001d028538";
1	StringTie	transcript	38903178	38903420	1000	+	.	gene_id "MSTRG.1166"; transcript_id "Zm00001d028546_T009"; gene_name "Zm00001d028546"; ref_gene_id "Zm00001d028546";
1	StringTie	exon	38903178	38903286	1000	+	.	gene_id "MSTRG.1166"; transcript_id "Zm00001d028546_T009"; exon_number "1"; gene_name "Zm00001d028546"; ref_gene_id "Zm00001d028546";
1	StringTie	exon	38903337	38903420	1000	+	.	gene_id "MSTRG.1166"; transcript_id "Zm00001d028546_T009"; exon_number "2"; gene_name "Zm00001d028546"; ref_gene_id "Zm00001d028546";
1	StringTie	transcript	38970321	38971690	1000	+	.	gene_id "MSTRG.1169"; transcript_id "Zm00001d028549_T002"; gene_name "Zm00001d028549"; ref_gene_id "Zm00001d028549";
1	StringTie	exon	38970321	38970375	1000	+	.	gene_id "MSTRG.1169"; transcript_id "Zm00001d028549_T002"; exon_number "1"; gene_name "Zm00001d028549"; ref_gene_id "Zm00001d028549";
1	StringTie	exon	38971193	38971298	1000	+	.	gene_id "MSTRG.1169"; transcript_id "Zm00001d028549_T002"; exon_number "2"; gene_name "Zm00001d028549"; ref_gene_id "Zm00001d028549";
1	StringTie	exon	38971378	38971690	1000	+	.	gene_id "MSTRG.1169"; transcript_id "Zm00001d028549_T002"; exon_number "3"; gene_name "Zm00001d028549"; ref_gene_id "Zm00001d028549";
1	StringTie	transcript	38977148	38978074	1000	+	.	gene_id "MSTRG.1170"; transcript_id "Zm00001d028550_T002"; gene_name "LIM-transcription factor 1"; ref_gene_id "Zm00001d028550";
1	StringTie	exon	38977148	38977210	1000	+	.	gene_id "MSTRG.1170"; transcript_id "Zm00001d028550_T002"; exon_number "1"; gene_name "LIM-transcription factor 1"; ref_gene_id "Zm00001d028550";
1	StringTie	exon	38977560	38978074	1000	+	.	gene_id "MSTRG.1170"; transcript_id "Zm00001d028550_T002"; exon_number "2"; gene_name "LIM-transcription factor 1"; ref_gene_id "Zm00001d028550";
1	StringTie	transcript	39099919	39104519	1000	+	.	gene_id "MSTRG.1177"; transcript_id "Zm00001d028558_T004"; gene_name "Zm00001d028558"; ref_gene_id "Zm00001d028558";
1	StringTie	exon	39099919	39100053	1000	+	.	gene_id "MSTRG.1177"; transcript_id "Zm00001d028558_T004"; exon_number "1"; gene_name "Zm00001d028558"; ref_gene_id "Zm00001d028558";
1	StringTie	exon	39100084	39100299	1000	+	.	gene_id "MSTRG.1177"; transcript_id "Zm00001d028558_T004"; exon_number "2"; gene_name "Zm00001d028558"; ref_gene_id "Zm00001d028558";
1	StringTie	exon	39103626	39104519	1000	+	.	gene_id "MSTRG.1177"; transcript_id "Zm00001d028558_T004"; exon_number "3"; gene_name "Zm00001d028558"; ref_gene_id "Zm00001d028558";
1	StringTie	transcript	39103626	39104519	1000	+	.	gene_id "MSTRG.1177"; transcript_id "Zm00001d028558_T005"; gene_name "Zm00001d028558"; ref_gene_id "Zm00001d028558";
1	StringTie	exon	39103626	39104519	1000	+	.	gene_id "MSTRG.1177"; transcript_id "Zm00001d028558_T005"; exon_number "1"; gene_name "Zm00001d028558"; ref_gene_id "Zm00001d028558";
1	StringTie	transcript	39161215	39161424	1000	+	.	gene_id "MSTRG.1178"; transcript_id "Zm00001d028560_T031"; gene_name "Zm00001d028560"; ref_gene_id "Zm00001d028560";
1	StringTie	exon	39161215	39161424	1000	+	.	gene_id "MSTRG.1178"; transcript_id "Zm00001d028560_T031"; exon_number "1"; gene_name "Zm00001d028560"; ref_gene_id "Zm00001d028560";
1	StringTie	transcript	39397978	39398395	1000	+	.	gene_id "MSTRG.1186"; transcript_id "Zm00001d028568_T006"; gene_name "Zm00001d028568"; ref_gene_id "Zm00001d028568";
1	StringTie	exon	39397978	39398073	1000	+	.	gene_id "MSTRG.1186"; transcript_id "Zm00001d028568_T006"; exon_number "1"; gene_name "Zm00001d028568"; ref_gene_id "Zm00001d028568";
1	StringTie	exon	39398173	39398395	1000	+	.	gene_id "MSTRG.1186"; transcript_id "Zm00001d028568_T006"; exon_number "2"; gene_name "Zm00001d028568"; ref_gene_id "Zm00001d028568";
1	StringTie	transcript	39398269	39398395	1000	+	.	gene_id "MSTRG.1186"; transcript_id "Zm00001d028568_T007"; gene_name "Zm00001d028568"; ref_gene_id "Zm00001d028568";
1	StringTie	exon	39398269	39398395	1000	+	.	gene_id "MSTRG.1186"; transcript_id "Zm00001d028568_T007"; exon_number "1"; gene_name "Zm00001d028568"; ref_gene_id "Zm00001d028568";
1	StringTie	transcript	39403882	39405395	1000	-	.	gene_id "MSTRG.1187"; transcript_id "Zm00001d028569_T016"; gene_name "Zm00001d028569"; ref_gene_id "Zm00001d028569";
1	StringTie	exon	39403882	39403896	1000	-	.	gene_id "MSTRG.1187"; transcript_id "Zm00001d028569_T016"; exon_number "1"; gene_name "Zm00001d028569"; ref_gene_id "Zm00001d028569";
1	StringTie	exon	39403978	39404082	1000	-	.	gene_id "MSTRG.1187"; transcript_id "Zm00001d028569_T016"; exon_number "2"; gene_name "Zm00001d028569"; ref_gene_id "Zm00001d028569";
1	StringTie	exon	39404155	39404244	1000	-	.	gene_id "MSTRG.1187"; transcript_id "Zm00001d028569_T016"; exon_number "3"; gene_name "Zm00001d028569"; ref_gene_id "Zm00001d028569";
1	StringTie	exon	39405355	39405395	1000	-	.	gene_id "MSTRG.1187"; transcript_id "Zm00001d028569_T016"; exon_number "4"; gene_name "Zm00001d028569"; ref_gene_id "Zm00001d028569";
1	StringTie	transcript	39461464	39461758	1000	-	.	gene_id "MSTRG.1190"; transcript_id "Zm00001d028572_T011"; gene_name "Zm00001d028572"; ref_gene_id "Zm00001d028572";
1	StringTie	exon	39461464	39461758	1000	-	.	gene_id "MSTRG.1190"; transcript_id "Zm00001d028572_T011"; exon_number "1"; gene_name "Zm00001d028572"; ref_gene_id "Zm00001d028572";
1	StringTie	transcript	39748864	39749950	1000	-	.	gene_id "MSTRG.1195"; transcript_id "Zm00001d028579_T020"; gene_name "Zm00001d028579"; ref_gene_id "Zm00001d028579";
1	StringTie	exon	39748864	39748920	1000	-	.	gene_id "MSTRG.1195"; transcript_id "Zm00001d028579_T020"; exon_number "1"; gene_name "Zm00001d028579"; ref_gene_id "Zm00001d028579";
1	StringTie	exon	39749404	39749527	1000	-	.	gene_id "MSTRG.1195"; transcript_id "Zm00001d028579_T020"; exon_number "2"; gene_name "Zm00001d028579"; ref_gene_id "Zm00001d028579";
1	StringTie	exon	39749626	39749713	1000	-	.	gene_id "MSTRG.1195"; transcript_id "Zm00001d028579_T020"; exon_number "3"; gene_name "Zm00001d028579"; ref_gene_id "Zm00001d028579";
1	StringTie	exon	39749813	39749950	1000	-	.	gene_id "MSTRG.1195"; transcript_id "Zm00001d028579_T020"; exon_number "4"; gene_name "Zm00001d028579"; ref_gene_id "Zm00001d028579";
1	StringTie	transcript	39753046	39753718	1000	-	.	gene_id "MSTRG.1195"; transcript_id "Zm00001d028579_T026"; gene_name "Zm00001d028579"; ref_gene_id "Zm00001d028579";
1	StringTie	exon	39753046	39753165	1000	-	.	gene_id "MSTRG.1195"; transcript_id "Zm00001d028579_T026"; exon_number "1"; gene_name "Zm00001d028579"; ref_gene_id "Zm00001d028579";
1	StringTie	exon	39753551	39753718	1000	-	.	gene_id "MSTRG.1195"; transcript_id "Zm00001d028579_T026"; exon_number "2"; gene_name "Zm00001d028579"; ref_gene_id "Zm00001d028579";
1	StringTie	transcript	39754688	39754921	1000	-	.	gene_id "MSTRG.1195"; transcript_id "Zm00001d028579_T023"; gene_name "Zm00001d028579"; ref_gene_id "Zm00001d028579";
1	StringTie	exon	39754688	39754921	1000	-	.	gene_id "MSTRG.1195"; transcript_id "Zm00001d028579_T023"; exon_number "1"; gene_name "Zm00001d028579"; ref_gene_id "Zm00001d028579";
1	StringTie	transcript	40036110	40036366	1000	+	.	gene_id "MSTRG.1199"; transcript_id "Zm00001d028585_T001"; gene_name "Sigma70-like-transcription factor 3"; ref_gene_id "Zm00001d028585";
1	StringTie	exon	40036110	40036366	1000	+	.	gene_id "MSTRG.1199"; transcript_id "Zm00001d028585_T001"; exon_number "1"; gene_name "Sigma70-like-transcription factor 3"; ref_gene_id "Zm00001d028585";
1	StringTie	transcript	40101931	40103377	1000	-	.	gene_id "MSTRG.1202"; transcript_id "Zm00001d028588_T002"; gene_name "Zm00001d028588"; ref_gene_id "Zm00001d028588";
1	StringTie	exon	40101931	40101977	1000	-	.	gene_id "MSTRG.1202"; transcript_id "Zm00001d028588_T002"; exon_number "1"; gene_name "Zm00001d028588"; ref_gene_id "Zm00001d028588";
1	StringTie	exon	40102417	40102467	1000	-	.	gene_id "MSTRG.1202"; transcript_id "Zm00001d028588_T002"; exon_number "2"; gene_name "Zm00001d028588"; ref_gene_id "Zm00001d028588";
1	StringTie	exon	40103232	40103377	1000	-	.	gene_id "MSTRG.1202"; transcript_id "Zm00001d028588_T002"; exon_number "3"; gene_name "Zm00001d028588"; ref_gene_id "Zm00001d028588";
1	StringTie	transcript	40253676	40255377	1000	+	.	gene_id "MSTRG.1210"; transcript_id "Zm00001d028597_T005"; gene_name "Zm00001d028597"; ref_gene_id "Zm00001d028597";
1	StringTie	exon	40253676	40253780	1000	+	.	gene_id "MSTRG.1210"; transcript_id "Zm00001d028597_T005"; exon_number "1"; gene_name "Zm00001d028597"; ref_gene_id "Zm00001d028597";
1	StringTie	exon	40255224	40255377	1000	+	.	gene_id "MSTRG.1210"; transcript_id "Zm00001d028597_T005"; exon_number "2"; gene_name "Zm00001d028597"; ref_gene_id "Zm00001d028597";
1	StringTie	transcript	40268286	40268585	1000	-	.	gene_id "MSTRG.1211"; transcript_id "Zm00001d028598_T001"; gene_name "Zm00001d028598"; ref_gene_id "Zm00001d028598";
1	StringTie	exon	40268286	40268585	1000	-	.	gene_id "MSTRG.1211"; transcript_id "Zm00001d028598_T001"; exon_number "1"; gene_name "Zm00001d028598"; ref_gene_id "Zm00001d028598";
1	StringTie	transcript	40429198	40429397	1000	+	.	gene_id "MSTRG.1213"; transcript_id "Zm00001d028601_T001"; gene_name "Zm00001d028601"; ref_gene_id "Zm00001d028601";
1	StringTie	exon	40429198	40429397	1000	+	.	gene_id "MSTRG.1213"; transcript_id "Zm00001d028601_T001"; exon_number "1"; gene_name "Zm00001d028601"; ref_gene_id "Zm00001d028601";
1	StringTie	transcript	40567801	40568408	1000	+	.	gene_id "MSTRG.1219"; transcript_id "Zm00001d022718_T001"; gene_name "Zm00001d022718"; ref_gene_id "Zm00001d022718";
1	StringTie	exon	40567801	40568408	1000	+	.	gene_id "MSTRG.1219"; transcript_id "Zm00001d022718_T001"; exon_number "1"; gene_name "Zm00001d022718"; ref_gene_id "Zm00001d022718";
1	StringTie	transcript	40594888	40598649	1000	+	.	gene_id "MSTRG.1220"; transcript_id "Zm00001d028606_T004"; gene_name "Zm00001d028606"; ref_gene_id "Zm00001d028606";
1	StringTie	exon	40594888	40595000	1000	+	.	gene_id "MSTRG.1220"; transcript_id "Zm00001d028606_T004"; exon_number "1"; gene_name "Zm00001d028606"; ref_gene_id "Zm00001d028606";
1	StringTie	exon	40595663	40595840	1000	+	.	gene_id "MSTRG.1220"; transcript_id "Zm00001d028606_T004"; exon_number "2"; gene_name "Zm00001d028606"; ref_gene_id "Zm00001d028606";
1	StringTie	exon	40598150	40598236	1000	+	.	gene_id "MSTRG.1220"; transcript_id "Zm00001d028606_T004"; exon_number "3"; gene_name "Zm00001d028606"; ref_gene_id "Zm00001d028606";
1	StringTie	exon	40598365	40598649	1000	+	.	gene_id "MSTRG.1220"; transcript_id "Zm00001d028606_T004"; exon_number "4"; gene_name "Zm00001d028606"; ref_gene_id "Zm00001d028606";
1	StringTie	transcript	40598150	40599175	1000	+	.	gene_id "MSTRG.1220"; transcript_id "Zm00001d028606_T006"; gene_name "Zm00001d028606"; ref_gene_id "Zm00001d028606";
1	StringTie	exon	40598150	40598236	1000	+	.	gene_id "MSTRG.1220"; transcript_id "Zm00001d028606_T006"; exon_number "1"; gene_name "Zm00001d028606"; ref_gene_id "Zm00001d028606";
1	StringTie	exon	40598365	40598533	1000	+	.	gene_id "MSTRG.1220"; transcript_id "Zm00001d028606_T006"; exon_number "2"; gene_name "Zm00001d028606"; ref_gene_id "Zm00001d028606";
1	StringTie	exon	40598666	40599175	1000	+	.	gene_id "MSTRG.1220"; transcript_id "Zm00001d028606_T006"; exon_number "3"; gene_name "Zm00001d028606"; ref_gene_id "Zm00001d028606";
1	StringTie	transcript	41017283	41017582	1000	+	.	gene_id "MSTRG.1231"; transcript_id "Zm00001d028619_T004"; gene_name "Zm00001d028619"; ref_gene_id "Zm00001d028619";
1	StringTie	exon	41017283	41017582	1000	+	.	gene_id "MSTRG.1231"; transcript_id "Zm00001d028619_T004"; exon_number "1"; gene_name "Zm00001d028619"; ref_gene_id "Zm00001d028619";
1	StringTie	transcript	41017283	41019203	1000	+	.	gene_id "MSTRG.1231"; transcript_id "Zm00001d028619_T013"; gene_name "Zm00001d028619"; ref_gene_id "Zm00001d028619";
1	StringTie	exon	41017283	41017582	1000	+	.	gene_id "MSTRG.1231"; transcript_id "Zm00001d028619_T013"; exon_number "1"; gene_name "Zm00001d028619"; ref_gene_id "Zm00001d028619";
1	StringTie	exon	41018714	41018760	1000	+	.	gene_id "MSTRG.1231"; transcript_id "Zm00001d028619_T013"; exon_number "2"; gene_name "Zm00001d028619"; ref_gene_id "Zm00001d028619";
1	StringTie	exon	41018922	41019013	1000	+	.	gene_id "MSTRG.1231"; transcript_id "Zm00001d028619_T013"; exon_number "3"; gene_name "Zm00001d028619"; ref_gene_id "Zm00001d028619";
1	StringTie	exon	41019107	41019203	1000	+	.	gene_id "MSTRG.1231"; transcript_id "Zm00001d028619_T013"; exon_number "4"; gene_name "Zm00001d028619"; ref_gene_id "Zm00001d028619";
1	StringTie	transcript	41018714	41019203	1000	+	.	gene_id "MSTRG.1231"; transcript_id "Zm00001d028619_T005"; gene_name "Zm00001d028619"; ref_gene_id "Zm00001d028619";
1	StringTie	exon	41018714	41018760	1000	+	.	gene_id "MSTRG.1231"; transcript_id "Zm00001d028619_T005"; exon_number "1"; gene_name "Zm00001d028619"; ref_gene_id "Zm00001d028619";
1	StringTie	exon	41018922	41019013	1000	+	.	gene_id "MSTRG.1231"; transcript_id "Zm00001d028619_T005"; exon_number "2"; gene_name "Zm00001d028619"; ref_gene_id "Zm00001d028619";
1	StringTie	exon	41019107	41019203	1000	+	.	gene_id "MSTRG.1231"; transcript_id "Zm00001d028619_T005"; exon_number "3"; gene_name "Zm00001d028619"; ref_gene_id "Zm00001d028619";
1	StringTie	transcript	41018714	41019377	1000	+	.	gene_id "MSTRG.1231"; transcript_id "Zm00001d028619_T010"; gene_name "Zm00001d028619"; ref_gene_id "Zm00001d028619";
1	StringTie	exon	41018714	41018760	1000	+	.	gene_id "MSTRG.1231"; transcript_id "Zm00001d028619_T010"; exon_number "1"; gene_name "Zm00001d028619"; ref_gene_id "Zm00001d028619";
1	StringTie	exon	41018922	41019018	1000	+	.	gene_id "MSTRG.1231"; transcript_id "Zm00001d028619_T010"; exon_number "2"; gene_name "Zm00001d028619"; ref_gene_id "Zm00001d028619";
1	StringTie	exon	41019107	41019203	1000	+	.	gene_id "MSTRG.1231"; transcript_id "Zm00001d028619_T010"; exon_number "3"; gene_name "Zm00001d028619"; ref_gene_id "Zm00001d028619";
1	StringTie	exon	41019299	41019377	1000	+	.	gene_id "MSTRG.1231"; transcript_id "Zm00001d028619_T010"; exon_number "4"; gene_name "Zm00001d028619"; ref_gene_id "Zm00001d028619";
1	StringTie	transcript	41457097	41457309	1000	-	.	gene_id "MSTRG.1241"; transcript_id "Zm00001d028631_T003"; gene_name "Zm00001d028631"; ref_gene_id "Zm00001d028631";
1	StringTie	exon	41457097	41457309	1000	-	.	gene_id "MSTRG.1241"; transcript_id "Zm00001d028631_T003"; exon_number "1"; gene_name "Zm00001d028631"; ref_gene_id "Zm00001d028631";
1	StringTie	transcript	41589492	41589873	1000	-	.	gene_id "MSTRG.1247"; transcript_id "Zm00001d028641_T003"; gene_name "Zm00001d028641"; ref_gene_id "Zm00001d028641";
1	StringTie	exon	41589492	41589566	1000	-	.	gene_id "MSTRG.1247"; transcript_id "Zm00001d028641_T003"; exon_number "1"; gene_name "Zm00001d028641"; ref_gene_id "Zm00001d028641";
1	StringTie	exon	41589678	41589873	1000	-	.	gene_id "MSTRG.1247"; transcript_id "Zm00001d028641_T003"; exon_number "2"; gene_name "Zm00001d028641"; ref_gene_id "Zm00001d028641";
1	StringTie	transcript	42230234	42230743	1000	-	.	gene_id "MSTRG.1266"; transcript_id "Zm00001d028662_T004"; gene_name "Zm00001d028662"; ref_gene_id "Zm00001d028662";
1	StringTie	exon	42230234	42230743	1000	-	.	gene_id "MSTRG.1266"; transcript_id "Zm00001d028662_T004"; exon_number "1"; gene_name "Zm00001d028662"; ref_gene_id "Zm00001d028662";
1	StringTie	transcript	42449537	42449934	1000	+	.	gene_id "MSTRG.1271"; transcript_id "Zm00001d028669_T022"; gene_name "Zm00001d028669"; ref_gene_id "Zm00001d028669";
1	StringTie	exon	42449537	42449546	1000	+	.	gene_id "MSTRG.1271"; transcript_id "Zm00001d028669_T022"; exon_number "1"; gene_name "Zm00001d028669"; ref_gene_id "Zm00001d028669";
1	StringTie	exon	42449624	42449700	1000	+	.	gene_id "MSTRG.1271"; transcript_id "Zm00001d028669_T022"; exon_number "2"; gene_name "Zm00001d028669"; ref_gene_id "Zm00001d028669";
1	StringTie	exon	42449793	42449934	1000	+	.	gene_id "MSTRG.1271"; transcript_id "Zm00001d028669_T022"; exon_number "3"; gene_name "Zm00001d028669"; ref_gene_id "Zm00001d028669";
1	StringTie	transcript	43356103	43358221	1000	+	.	gene_id "MSTRG.1292"; transcript_id "Zm00001d028695_T004"; gene_name "Zm00001d028695"; ref_gene_id "Zm00001d028695";
1	StringTie	exon	43356103	43358221	1000	+	.	gene_id "MSTRG.1292"; transcript_id "Zm00001d028695_T004"; exon_number "1"; gene_name "Zm00001d028695"; ref_gene_id "Zm00001d028695";
1	StringTie	transcript	43439943	43440379	1000	-	.	gene_id "MSTRG.1295"; transcript_id "Zm00001d028698_T003"; gene_name "Zm00001d028698"; ref_gene_id "Zm00001d028698";
1	StringTie	exon	43439943	43440063	1000	-	.	gene_id "MSTRG.1295"; transcript_id "Zm00001d028698_T003"; exon_number "1"; gene_name "Zm00001d028698"; ref_gene_id "Zm00001d028698";
1	StringTie	exon	43440153	43440238	1000	-	.	gene_id "MSTRG.1295"; transcript_id "Zm00001d028698_T003"; exon_number "2"; gene_name "Zm00001d028698"; ref_gene_id "Zm00001d028698";
1	StringTie	exon	43440323	43440379	1000	-	.	gene_id "MSTRG.1295"; transcript_id "Zm00001d028698_T003"; exon_number "3"; gene_name "Zm00001d028698"; ref_gene_id "Zm00001d028698";
1	StringTie	transcript	43567082	43568191	1000	+	.	gene_id "MSTRG.1296"; transcript_id "Zm00001d028699_T012"; gene_name "Zm00001d028699"; ref_gene_id "Zm00001d028699";
1	StringTie	exon	43567082	43567116	1000	+	.	gene_id "MSTRG.1296"; transcript_id "Zm00001d028699_T012"; exon_number "1"; gene_name "Zm00001d028699"; ref_gene_id "Zm00001d028699";
1	StringTie	exon	43567779	43567848	1000	+	.	gene_id "MSTRG.1296"; transcript_id "Zm00001d028699_T012"; exon_number "2"; gene_name "Zm00001d028699"; ref_gene_id "Zm00001d028699";
1	StringTie	exon	43567938	43567984	1000	+	.	gene_id "MSTRG.1296"; transcript_id "Zm00001d028699_T012"; exon_number "3"; gene_name "Zm00001d028699"; ref_gene_id "Zm00001d028699";
1	StringTie	exon	43568059	43568191	1000	+	.	gene_id "MSTRG.1296"; transcript_id "Zm00001d028699_T012"; exon_number "4"; gene_name "Zm00001d028699"; ref_gene_id "Zm00001d028699";
1	StringTie	transcript	43568542	43570727	1000	+	.	gene_id "MSTRG.1296"; transcript_id "Zm00001d028699_T038"; gene_name "Zm00001d028699"; ref_gene_id "Zm00001d028699";
1	StringTie	exon	43568542	43568543	1000	+	.	gene_id "MSTRG.1296"; transcript_id "Zm00001d028699_T038"; exon_number "1"; gene_name "Zm00001d028699"; ref_gene_id "Zm00001d028699";
1	StringTie	exon	43569826	43569846	1000	+	.	gene_id "MSTRG.1296"; transcript_id "Zm00001d028699_T038"; exon_number "2"; gene_name "Zm00001d028699"; ref_gene_id "Zm00001d028699";
1	StringTie	exon	43569959	43570025	1000	+	.	gene_id "MSTRG.1296"; transcript_id "Zm00001d028699_T038"; exon_number "3"; gene_name "Zm00001d028699"; ref_gene_id "Zm00001d028699";
1	StringTie	exon	43570105	43570156	1000	+	.	gene_id "MSTRG.1296"; transcript_id "Zm00001d028699_T038"; exon_number "4"; gene_name "Zm00001d028699"; ref_gene_id "Zm00001d028699";
1	StringTie	exon	43570358	43570455	1000	+	.	gene_id "MSTRG.1296"; transcript_id "Zm00001d028699_T038"; exon_number "5"; gene_name "Zm00001d028699"; ref_gene_id "Zm00001d028699";
1	StringTie	exon	43570673	43570727	1000	+	.	gene_id "MSTRG.1296"; transcript_id "Zm00001d028699_T038"; exon_number "6"; gene_name "Zm00001d028699"; ref_gene_id "Zm00001d028699";
1	StringTie	transcript	43569791	43570305	1000	+	.	gene_id "MSTRG.1296"; transcript_id "Zm00001d028699_T043"; gene_name "Zm00001d028699"; ref_gene_id "Zm00001d028699";
1	StringTie	exon	43569791	43569846	1000	+	.	gene_id "MSTRG.1296"; transcript_id "Zm00001d028699_T043"; exon_number "1"; gene_name "Zm00001d028699"; ref_gene_id "Zm00001d028699";
1	StringTie	exon	43569959	43570025	1000	+	.	gene_id "MSTRG.1296"; transcript_id "Zm00001d028699_T043"; exon_number "2"; gene_name "Zm00001d028699"; ref_gene_id "Zm00001d028699";
1	StringTie	exon	43570105	43570305	1000	+	.	gene_id "MSTRG.1296"; transcript_id "Zm00001d028699_T043"; exon_number "3"; gene_name "Zm00001d028699"; ref_gene_id "Zm00001d028699";
1	StringTie	transcript	43569791	43570649	1000	+	.	gene_id "MSTRG.1296"; transcript_id "Zm00001d028699_T053"; gene_name "Zm00001d028699"; ref_gene_id "Zm00001d028699";
1	StringTie	exon	43569791	43569846	1000	+	.	gene_id "MSTRG.1296"; transcript_id "Zm00001d028699_T053"; exon_number "1"; gene_name "Zm00001d028699"; ref_gene_id "Zm00001d028699";
1	StringTie	exon	43569959	43570025	1000	+	.	gene_id "MSTRG.1296"; transcript_id "Zm00001d028699_T053"; exon_number "2"; gene_name "Zm00001d028699"; ref_gene_id "Zm00001d028699";
1	StringTie	exon	43570105	43570156	1000	+	.	gene_id "MSTRG.1296"; transcript_id "Zm00001d028699_T053"; exon_number "3"; gene_name "Zm00001d028699"; ref_gene_id "Zm00001d028699";
1	StringTie	exon	43570358	43570431	1000	+	.	gene_id "MSTRG.1296"; transcript_id "Zm00001d028699_T053"; exon_number "4"; gene_name "Zm00001d028699"; ref_gene_id "Zm00001d028699";
1	StringTie	exon	43570611	43570649	1000	+	.	gene_id "MSTRG.1296"; transcript_id "Zm00001d028699_T053"; exon_number "5"; gene_name "Zm00001d028699"; ref_gene_id "Zm00001d028699";
1	StringTie	transcript	43579236	43579908	1000	+	.	gene_id "MSTRG.1296"; transcript_id "Zm00001d028699_T059"; gene_name "Zm00001d028699"; ref_gene_id "Zm00001d028699";
1	StringTie	exon	43579236	43579280	1000	+	.	gene_id "MSTRG.1296"; transcript_id "Zm00001d028699_T059"; exon_number "1"; gene_name "Zm00001d028699"; ref_gene_id "Zm00001d028699";
1	StringTie	exon	43579527	43579607	1000	+	.	gene_id "MSTRG.1296"; transcript_id "Zm00001d028699_T059"; exon_number "2"; gene_name "Zm00001d028699"; ref_gene_id "Zm00001d028699";
1	StringTie	exon	43579722	43579908	1000	+	.	gene_id "MSTRG.1296"; transcript_id "Zm00001d028699_T059"; exon_number "3"; gene_name "Zm00001d028699"; ref_gene_id "Zm00001d028699";
1	StringTie	transcript	43832184	43832815	1000	+	.	gene_id "MSTRG.1302"; transcript_id "Zm00001d028707_T003"; gene_name "Zm00001d028707"; ref_gene_id "Zm00001d028707";
1	StringTie	exon	43832184	43832815	1000	+	.	gene_id "MSTRG.1302"; transcript_id "Zm00001d028707_T003"; exon_number "1"; gene_name "Zm00001d028707"; ref_gene_id "Zm00001d028707";
1	StringTie	transcript	43891995	43892168	1000	+	.	gene_id "MSTRG.1303"; transcript_id "Zm00001d028708_T001"; gene_name "Zm00001d028708"; ref_gene_id "Zm00001d028708";
1	StringTie	exon	43891995	43892168	1000	+	.	gene_id "MSTRG.1303"; transcript_id "Zm00001d028708_T001"; exon_number "1"; gene_name "Zm00001d028708"; ref_gene_id "Zm00001d028708";
1	StringTie	transcript	43901380	43903298	1000	+	.	gene_id "MSTRG.1304"; transcript_id "Zm00001d028709_T009"; gene_name "Zm00001d028709"; ref_gene_id "Zm00001d028709";
1	StringTie	exon	43901380	43901498	1000	+	.	gene_id "MSTRG.1304"; transcript_id "Zm00001d028709_T009"; exon_number "1"; gene_name "Zm00001d028709"; ref_gene_id "Zm00001d028709";
1	StringTie	exon	43901608	43901643	1000	+	.	gene_id "MSTRG.1304"; transcript_id "Zm00001d028709_T009"; exon_number "2"; gene_name "Zm00001d028709"; ref_gene_id "Zm00001d028709";
1	StringTie	exon	43901907	43901948	1000	+	.	gene_id "MSTRG.1304"; transcript_id "Zm00001d028709_T009"; exon_number "3"; gene_name "Zm00001d028709"; ref_gene_id "Zm00001d028709";
1	StringTie	exon	43903075	43903123	1000	+	.	gene_id "MSTRG.1304"; transcript_id "Zm00001d028709_T009"; exon_number "4"; gene_name "Zm00001d028709"; ref_gene_id "Zm00001d028709";
1	StringTie	exon	43903264	43903298	1000	+	.	gene_id "MSTRG.1304"; transcript_id "Zm00001d028709_T009"; exon_number "5"; gene_name "Zm00001d028709"; ref_gene_id "Zm00001d028709";
1	StringTie	transcript	43903299	43903430	1000	+	.	gene_id "MSTRG.1304"; transcript_id "Zm00001d028709_T005"; gene_name "Zm00001d028709"; ref_gene_id "Zm00001d028709";
1	StringTie	exon	43903299	43903430	1000	+	.	gene_id "MSTRG.1304"; transcript_id "Zm00001d028709_T005"; exon_number "1"; gene_name "Zm00001d028709"; ref_gene_id "Zm00001d028709";
1	StringTie	transcript	43903299	43903510	1000	+	.	gene_id "MSTRG.1304"; transcript_id "Zm00001d028709_T007"; gene_name "Zm00001d028709"; ref_gene_id "Zm00001d028709";
1	StringTie	exon	43903299	43903379	1000	+	.	gene_id "MSTRG.1304"; transcript_id "Zm00001d028709_T007"; exon_number "1"; gene_name "Zm00001d028709"; ref_gene_id "Zm00001d028709";
1	StringTie	exon	43903403	43903510	1000	+	.	gene_id "MSTRG.1304"; transcript_id "Zm00001d028709_T007"; exon_number "2"; gene_name "Zm00001d028709"; ref_gene_id "Zm00001d028709";
1	StringTie	transcript	43910852	43911257	1000	-	.	gene_id "MSTRG.1306"; transcript_id "Zm00001d028711_T004"; gene_name "MAP kinase3"; ref_gene_id "Zm00001d028711";
1	StringTie	exon	43910852	43911257	1000	-	.	gene_id "MSTRG.1306"; transcript_id "Zm00001d028711_T004"; exon_number "1"; gene_name "MAP kinase3"; ref_gene_id "Zm00001d028711";
1	StringTie	transcript	44002602	44002706	1000	+	.	gene_id "MSTRG.1307"; transcript_id "Zm00001d028712_T017"; gene_name "Zm00001d028712"; ref_gene_id "Zm00001d028712";
1	StringTie	exon	44002602	44002706	1000	+	.	gene_id "MSTRG.1307"; transcript_id "Zm00001d028712_T017"; exon_number "1"; gene_name "Zm00001d028712"; ref_gene_id "Zm00001d028712";
1	StringTie	transcript	44013980	44014426	1000	-	.	gene_id "MSTRG.1309"; transcript_id "Zm00001d028714_T002"; gene_name "Zm00001d028714"; ref_gene_id "Zm00001d028714";
1	StringTie	exon	44013980	44014005	1000	-	.	gene_id "MSTRG.1309"; transcript_id "Zm00001d028714_T002"; exon_number "1"; gene_name "Zm00001d028714"; ref_gene_id "Zm00001d028714";
1	StringTie	exon	44014268	44014426	1000	-	.	gene_id "MSTRG.1309"; transcript_id "Zm00001d028714_T002"; exon_number "2"; gene_name "Zm00001d028714"; ref_gene_id "Zm00001d028714";
1	StringTie	transcript	44168731	44170920	1000	+	.	gene_id "MSTRG.1310"; transcript_id "Zm00001d028715_T002"; gene_name "Zm00001d028715"; ref_gene_id "Zm00001d028715";
1	StringTie	exon	44168731	44168940	1000	+	.	gene_id "MSTRG.1310"; transcript_id "Zm00001d028715_T002"; exon_number "1"; gene_name "Zm00001d028715"; ref_gene_id "Zm00001d028715";
1	StringTie	exon	44169676	44170920	1000	+	.	gene_id "MSTRG.1310"; transcript_id "Zm00001d028715_T002"; exon_number "2"; gene_name "Zm00001d028715"; ref_gene_id "Zm00001d028715";
1	StringTie	transcript	44179886	44180241	1000	-	.	gene_id "MSTRG.1311"; transcript_id "Zm00001d028718_T001"; gene_name "proteolipid membrane potential regulator4"; ref_gene_id "Zm00001d028718";
1	StringTie	exon	44179886	44179969	1000	-	.	gene_id "MSTRG.1311"; transcript_id "Zm00001d028718_T001"; exon_number "1"; gene_name "proteolipid membrane potential regulator4"; ref_gene_id "Zm00001d028718";
1	StringTie	exon	44180083	44180241	1000	-	.	gene_id "MSTRG.1311"; transcript_id "Zm00001d028718_T001"; exon_number "2"; gene_name "proteolipid membrane potential regulator4"; ref_gene_id "Zm00001d028718";
1	StringTie	transcript	45602689	45604198	1000	-	.	gene_id "MSTRG.1349"; transcript_id "Zm00001d028755_T003"; gene_name "Zm00001d028755"; ref_gene_id "Zm00001d028755";
1	StringTie	exon	45602689	45604198	1000	-	.	gene_id "MSTRG.1349"; transcript_id "Zm00001d028755_T003"; exon_number "1"; gene_name "Zm00001d028755"; ref_gene_id "Zm00001d028755";
1	StringTie	transcript	45868876	45869561	1000	+	.	gene_id "MSTRG.1354"; transcript_id "Zm00001d028762_T006"; gene_name "Zm00001d028762"; ref_gene_id "Zm00001d028762";
1	StringTie	exon	45868876	45869013	1000	+	.	gene_id "MSTRG.1354"; transcript_id "Zm00001d028762_T006"; exon_number "1"; gene_name "Zm00001d028762"; ref_gene_id "Zm00001d028762";
1	StringTie	exon	45869095	45869158	1000	+	.	gene_id "MSTRG.1354"; transcript_id "Zm00001d028762_T006"; exon_number "2"; gene_name "Zm00001d028762"; ref_gene_id "Zm00001d028762";
1	StringTie	exon	45869514	45869561	1000	+	.	gene_id "MSTRG.1354"; transcript_id "Zm00001d028762_T006"; exon_number "3"; gene_name "Zm00001d028762"; ref_gene_id "Zm00001d028762";
1	StringTie	transcript	46319314	46319693	1000	+	.	gene_id "MSTRG.1372"; transcript_id "Zm00001d028782_T005"; gene_name "Zm00001d028782"; ref_gene_id "Zm00001d028782";
1	StringTie	exon	46319314	46319693	1000	+	.	gene_id "MSTRG.1372"; transcript_id "Zm00001d028782_T005"; exon_number "1"; gene_name "Zm00001d028782"; ref_gene_id "Zm00001d028782";
1	StringTie	transcript	46822110	46823093	1000	+	.	gene_id "MSTRG.1388"; transcript_id "Zm00001d028801_T003"; gene_name "Zm00001d028801"; ref_gene_id "Zm00001d028801";
1	StringTie	exon	46822110	46822310	1000	+	.	gene_id "MSTRG.1388"; transcript_id "Zm00001d028801_T003"; exon_number "1"; gene_name "Zm00001d028801"; ref_gene_id "Zm00001d028801";
1	StringTie	exon	46822388	46822513	1000	+	.	gene_id "MSTRG.1388"; transcript_id "Zm00001d028801_T003"; exon_number "2"; gene_name "Zm00001d028801"; ref_gene_id "Zm00001d028801";
1	StringTie	exon	46822728	46823093	1000	+	.	gene_id "MSTRG.1388"; transcript_id "Zm00001d028801_T003"; exon_number "3"; gene_name "Zm00001d028801"; ref_gene_id "Zm00001d028801";
1	StringTie	transcript	46822388	46823093	1000	+	.	gene_id "MSTRG.1388"; transcript_id "Zm00001d028801_T005"; gene_name "Zm00001d028801"; ref_gene_id "Zm00001d028801";
1	StringTie	exon	46822388	46822513	1000	+	.	gene_id "MSTRG.1388"; transcript_id "Zm00001d028801_T005"; exon_number "1"; gene_name "Zm00001d028801"; ref_gene_id "Zm00001d028801";
1	StringTie	exon	46822728	46823093	1000	+	.	gene_id "MSTRG.1388"; transcript_id "Zm00001d028801_T005"; exon_number "2"; gene_name "Zm00001d028801"; ref_gene_id "Zm00001d028801";
1	StringTie	transcript	46964260	46964457	1000	-	.	gene_id "MSTRG.1393"; transcript_id "Zm00001d028807_T002"; gene_name "Zm00001d028807"; ref_gene_id "Zm00001d028807";
1	StringTie	exon	46964260	46964457	1000	-	.	gene_id "MSTRG.1393"; transcript_id "Zm00001d028807_T002"; exon_number "1"; gene_name "Zm00001d028807"; ref_gene_id "Zm00001d028807";
1	StringTie	transcript	47150537	47151051	1000	+	.	gene_id "MSTRG.1397"; transcript_id "Zm00001d028810_T003"; gene_name "Zm00001d028810"; ref_gene_id "Zm00001d028810";
1	StringTie	exon	47150537	47151051	1000	+	.	gene_id "MSTRG.1397"; transcript_id "Zm00001d028810_T003"; exon_number "1"; gene_name "Zm00001d028810"; ref_gene_id "Zm00001d028810";
1	StringTie	transcript	47403235	47403781	1000	+	.	gene_id "MSTRG.1400"; transcript_id "Zm00001d028813_T002"; gene_name "Zm00001d028813"; ref_gene_id "Zm00001d028813";
1	StringTie	exon	47403235	47403309	1000	+	.	gene_id "MSTRG.1400"; transcript_id "Zm00001d028813_T002"; exon_number "1"; gene_name "Zm00001d028813"; ref_gene_id "Zm00001d028813";
1	StringTie	exon	47403401	47403781	1000	+	.	gene_id "MSTRG.1400"; transcript_id "Zm00001d028813_T002"; exon_number "2"; gene_name "Zm00001d028813"; ref_gene_id "Zm00001d028813";
1	StringTie	transcript	47982652	47982814	1000	-	.	gene_id "MSTRG.1416"; transcript_id "Zm00001d028830_T005"; gene_name "Zm00001d028830"; ref_gene_id "Zm00001d028830";
1	StringTie	exon	47982652	47982814	1000	-	.	gene_id "MSTRG.1416"; transcript_id "Zm00001d028830_T005"; exon_number "1"; gene_name "Zm00001d028830"; ref_gene_id "Zm00001d028830";
1	StringTie	transcript	47985012	47986438	1000	-	.	gene_id "MSTRG.1416"; transcript_id "Zm00001d028830_T011"; gene_name "Zm00001d028830"; ref_gene_id "Zm00001d028830";
1	StringTie	exon	47985012	47985024	1000	-	.	gene_id "MSTRG.1416"; transcript_id "Zm00001d028830_T011"; exon_number "1"; gene_name "Zm00001d028830"; ref_gene_id "Zm00001d028830";
1	StringTie	exon	47985137	47985207	1000	-	.	gene_id "MSTRG.1416"; transcript_id "Zm00001d028830_T011"; exon_number "2"; gene_name "Zm00001d028830"; ref_gene_id "Zm00001d028830";
1	StringTie	exon	47985292	47985293	1000	-	.	gene_id "MSTRG.1416"; transcript_id "Zm00001d028830_T011"; exon_number "3"; gene_name "Zm00001d028830"; ref_gene_id "Zm00001d028830";
1	StringTie	exon	47985396	47985576	1000	-	.	gene_id "MSTRG.1416"; transcript_id "Zm00001d028830_T011"; exon_number "4"; gene_name "Zm00001d028830"; ref_gene_id "Zm00001d028830";
1	StringTie	exon	47985689	47985691	1000	-	.	gene_id "MSTRG.1416"; transcript_id "Zm00001d028830_T011"; exon_number "5"; gene_name "Zm00001d028830"; ref_gene_id "Zm00001d028830";
1	StringTie	exon	47986346	47986438	1000	-	.	gene_id "MSTRG.1416"; transcript_id "Zm00001d028830_T011"; exon_number "6"; gene_name "Zm00001d028830"; ref_gene_id "Zm00001d028830";
1	StringTie	transcript	47985292	47986438	1000	-	.	gene_id "MSTRG.1416"; transcript_id "Zm00001d028830_T001"; gene_name "Zm00001d028830"; ref_gene_id "Zm00001d028830";
1	StringTie	exon	47985292	47985293	1000	-	.	gene_id "MSTRG.1416"; transcript_id "Zm00001d028830_T001"; exon_number "1"; gene_name "Zm00001d028830"; ref_gene_id "Zm00001d028830";
1	StringTie	exon	47985396	47985576	1000	-	.	gene_id "MSTRG.1416"; transcript_id "Zm00001d028830_T001"; exon_number "2"; gene_name "Zm00001d028830"; ref_gene_id "Zm00001d028830";
1	StringTie	exon	47985689	47985691	1000	-	.	gene_id "MSTRG.1416"; transcript_id "Zm00001d028830_T001"; exon_number "3"; gene_name "Zm00001d028830"; ref_gene_id "Zm00001d028830";
1	StringTie	exon	47986346	47986438	1000	-	.	gene_id "MSTRG.1416"; transcript_id "Zm00001d028830_T001"; exon_number "4"; gene_name "Zm00001d028830"; ref_gene_id "Zm00001d028830";
1	StringTie	transcript	48282439	48282929	1000	+	.	gene_id "MSTRG.1422"; transcript_id "Zm00001d028837_T001"; gene_name "Zm00001d028837"; ref_gene_id "Zm00001d028837";
1	StringTie	exon	48282439	48282929	1000	+	.	gene_id "MSTRG.1422"; transcript_id "Zm00001d028837_T001"; exon_number "1"; gene_name "Zm00001d028837"; ref_gene_id "Zm00001d028837";
1	StringTie	transcript	49061306	49063472	1000	-	.	gene_id "MSTRG.1446"; transcript_id "Zm00001d028867_T003"; gene_name "Zm00001d028867"; ref_gene_id "Zm00001d028867";
1	StringTie	exon	49061306	49061359	1000	-	.	gene_id "MSTRG.1446"; transcript_id "Zm00001d028867_T003"; exon_number "1"; gene_name "Zm00001d028867"; ref_gene_id "Zm00001d028867";
1	StringTie	exon	49061511	49061579	1000	-	.	gene_id "MSTRG.1446"; transcript_id "Zm00001d028867_T003"; exon_number "2"; gene_name "Zm00001d028867"; ref_gene_id "Zm00001d028867";
1	StringTie	exon	49061692	49061739	1000	-	.	gene_id "MSTRG.1446"; transcript_id "Zm00001d028867_T003"; exon_number "3"; gene_name "Zm00001d028867"; ref_gene_id "Zm00001d028867";
1	StringTie	exon	49061865	49061921	1000	-	.	gene_id "MSTRG.1446"; transcript_id "Zm00001d028867_T003"; exon_number "4"; gene_name "Zm00001d028867"; ref_gene_id "Zm00001d028867";
1	StringTie	exon	49063373	49063472	1000	-	.	gene_id "MSTRG.1446"; transcript_id "Zm00001d028867_T003"; exon_number "5"; gene_name "Zm00001d028867"; ref_gene_id "Zm00001d028867";
1	StringTie	transcript	49088145	49088359	1000	-	.	gene_id "MSTRG.1447"; transcript_id "Zm00001d028868_T003"; gene_name "Zm00001d028868"; ref_gene_id "Zm00001d028868";
1	StringTie	exon	49088145	49088359	1000	-	.	gene_id "MSTRG.1447"; transcript_id "Zm00001d028868_T003"; exon_number "1"; gene_name "Zm00001d028868"; ref_gene_id "Zm00001d028868";
1	StringTie	transcript	49091865	49093033	1000	-	.	gene_id "MSTRG.1447"; transcript_id "Zm00001d028868_T004"; gene_name "Zm00001d028868"; ref_gene_id "Zm00001d028868";
1	StringTie	exon	49091865	49091927	1000	-	.	gene_id "MSTRG.1447"; transcript_id "Zm00001d028868_T004"; exon_number "1"; gene_name "Zm00001d028868"; ref_gene_id "Zm00001d028868";
1	StringTie	exon	49092495	49093033	1000	-	.	gene_id "MSTRG.1447"; transcript_id "Zm00001d028868_T004"; exon_number "2"; gene_name "Zm00001d028868"; ref_gene_id "Zm00001d028868";
1	StringTie	transcript	49987984	49988692	1000	+	.	gene_id "MSTRG.1474"; transcript_id "Zm00001d028894_T003"; gene_name "Zm00001d028894"; ref_gene_id "Zm00001d028894";
1	StringTie	exon	49987984	49988088	1000	+	.	gene_id "MSTRG.1474"; transcript_id "Zm00001d028894_T003"; exon_number "1"; gene_name "Zm00001d028894"; ref_gene_id "Zm00001d028894";
1	StringTie	exon	49988477	49988692	1000	+	.	gene_id "MSTRG.1474"; transcript_id "Zm00001d028894_T003"; exon_number "2"; gene_name "Zm00001d028894"; ref_gene_id "Zm00001d028894";
1	StringTie	transcript	50025245	50025642	1000	-	.	gene_id "MSTRG.1476"; transcript_id "Zm00001d028896_T012"; gene_name "Zm00001d028896"; ref_gene_id "Zm00001d028896";
1	StringTie	exon	50025245	50025361	1000	-	.	gene_id "MSTRG.1476"; transcript_id "Zm00001d028896_T012"; exon_number "1"; gene_name "Zm00001d028896"; ref_gene_id "Zm00001d028896";
1	StringTie	exon	50025442	50025642	1000	-	.	gene_id "MSTRG.1476"; transcript_id "Zm00001d028896_T012"; exon_number "2"; gene_name "Zm00001d028896"; ref_gene_id "Zm00001d028896";
1	StringTie	transcript	50143395	50144895	1000	+	.	gene_id "MSTRG.1477"; transcript_id "Zm00001d028898_T010"; gene_name "Zm00001d028898"; ref_gene_id "Zm00001d028898";
1	StringTie	exon	50143395	50143412	1000	+	.	gene_id "MSTRG.1477"; transcript_id "Zm00001d028898_T010"; exon_number "1"; gene_name "Zm00001d028898"; ref_gene_id "Zm00001d028898";
1	StringTie	exon	50144084	50144154	1000	+	.	gene_id "MSTRG.1477"; transcript_id "Zm00001d028898_T010"; exon_number "2"; gene_name "Zm00001d028898"; ref_gene_id "Zm00001d028898";
1	StringTie	exon	50144270	50144895	1000	+	.	gene_id "MSTRG.1477"; transcript_id "Zm00001d028898_T010"; exon_number "3"; gene_name "Zm00001d028898"; ref_gene_id "Zm00001d028898";
1	StringTie	transcript	50143616	50144895	1000	+	.	gene_id "MSTRG.1477"; transcript_id "Zm00001d028898_T009"; gene_name "Zm00001d028898"; ref_gene_id "Zm00001d028898";
1	StringTie	exon	50143616	50143646	1000	+	.	gene_id "MSTRG.1477"; transcript_id "Zm00001d028898_T009"; exon_number "1"; gene_name "Zm00001d028898"; ref_gene_id "Zm00001d028898";
1	StringTie	exon	50144097	50144154	1000	+	.	gene_id "MSTRG.1477"; transcript_id "Zm00001d028898_T009"; exon_number "2"; gene_name "Zm00001d028898"; ref_gene_id "Zm00001d028898";
1	StringTie	exon	50144270	50144895	1000	+	.	gene_id "MSTRG.1477"; transcript_id "Zm00001d028898_T009"; exon_number "3"; gene_name "Zm00001d028898"; ref_gene_id "Zm00001d028898";
1	StringTie	transcript	50143907	50144895	1000	+	.	gene_id "MSTRG.1477"; transcript_id "Zm00001d028898_T004"; gene_name "Zm00001d028898"; ref_gene_id "Zm00001d028898";
1	StringTie	exon	50143907	50144154	1000	+	.	gene_id "MSTRG.1477"; transcript_id "Zm00001d028898_T004"; exon_number "1"; gene_name "Zm00001d028898"; ref_gene_id "Zm00001d028898";
1	StringTie	exon	50144270	50144895	1000	+	.	gene_id "MSTRG.1477"; transcript_id "Zm00001d028898_T004"; exon_number "2"; gene_name "Zm00001d028898"; ref_gene_id "Zm00001d028898";
1	StringTie	transcript	50518726	50522266	1000	-	.	gene_id "MSTRG.1486"; transcript_id "Zm00001d028907_T037"; gene_name "Zm00001d028907"; ref_gene_id "Zm00001d028907";
1	StringTie	exon	50518726	50518733	1000	-	.	gene_id "MSTRG.1486"; transcript_id "Zm00001d028907_T037"; exon_number "1"; gene_name "Zm00001d028907"; ref_gene_id "Zm00001d028907";
1	StringTie	exon	50522002	50522266	1000	-	.	gene_id "MSTRG.1486"; transcript_id "Zm00001d028907_T037"; exon_number "2"; gene_name "Zm00001d028907"; ref_gene_id "Zm00001d028907";
1	StringTie	transcript	50521913	50522266	1000	-	.	gene_id "MSTRG.1486"; transcript_id "Zm00001d028907_T042"; gene_name "Zm00001d028907"; ref_gene_id "Zm00001d028907";
1	StringTie	exon	50521913	50522266	1000	-	.	gene_id "MSTRG.1486"; transcript_id "Zm00001d028907_T042"; exon_number "1"; gene_name "Zm00001d028907"; ref_gene_id "Zm00001d028907";
1	StringTie	transcript	50781873	50783809	1000	+	.	gene_id "MSTRG.1488"; transcript_id "Zm00001d028910_T003"; gene_name "Zm00001d028910"; ref_gene_id "Zm00001d028910";
1	StringTie	exon	50781873	50782009	1000	+	.	gene_id "MSTRG.1488"; transcript_id "Zm00001d028910_T003"; exon_number "1"; gene_name "Zm00001d028910"; ref_gene_id "Zm00001d028910";
1	StringTie	exon	50782597	50782732	1000	+	.	gene_id "MSTRG.1488"; transcript_id "Zm00001d028910_T003"; exon_number "2"; gene_name "Zm00001d028910"; ref_gene_id "Zm00001d028910";
1	StringTie	exon	50783002	50783809	1000	+	.	gene_id "MSTRG.1488"; transcript_id "Zm00001d028910_T003"; exon_number "3"; gene_name "Zm00001d028910"; ref_gene_id "Zm00001d028910";
1	StringTie	transcript	50783002	50783809	1000	+	.	gene_id "MSTRG.1488"; transcript_id "Zm00001d028910_T001"; gene_name "Zm00001d028910"; ref_gene_id "Zm00001d028910";
1	StringTie	exon	50783002	50783809	1000	+	.	gene_id "MSTRG.1488"; transcript_id "Zm00001d028910_T001"; exon_number "1"; gene_name "Zm00001d028910"; ref_gene_id "Zm00001d028910";
1	StringTie	transcript	51159502	51160417	1000	+	.	gene_id "MSTRG.1491"; transcript_id "Zm00001d028915_T014"; gene_name "Zm00001d028915"; ref_gene_id "Zm00001d028915";
1	StringTie	exon	51159502	51159522	1000	+	.	gene_id "MSTRG.1491"; transcript_id "Zm00001d028915_T014"; exon_number "1"; gene_name "Zm00001d028915"; ref_gene_id "Zm00001d028915";
1	StringTie	exon	51160057	51160417	1000	+	.	gene_id "MSTRG.1491"; transcript_id "Zm00001d028915_T014"; exon_number "2"; gene_name "Zm00001d028915"; ref_gene_id "Zm00001d028915";
1	StringTie	transcript	51593148	51593389	1000	+	.	gene_id "MSTRG.1497"; transcript_id "Zm00001d028921_T006"; gene_name "Zm00001d028921"; ref_gene_id "Zm00001d028921";
1	StringTie	exon	51593148	51593389	1000	+	.	gene_id "MSTRG.1497"; transcript_id "Zm00001d028921_T006"; exon_number "1"; gene_name "Zm00001d028921"; ref_gene_id "Zm00001d028921";
1	StringTie	transcript	51602498	51603012	1000	-	.	gene_id "MSTRG.1498"; transcript_id "Zm00001d028922_T001"; gene_name "Zm00001d028922"; ref_gene_id "Zm00001d028922";
1	StringTie	exon	51602498	51603012	1000	-	.	gene_id "MSTRG.1498"; transcript_id "Zm00001d028922_T001"; exon_number "1"; gene_name "Zm00001d028922"; ref_gene_id "Zm00001d028922";
1	StringTie	transcript	52168088	52168201	1000	-	.	gene_id "MSTRG.1510"; transcript_id "Zm00001d028936_T006"; gene_name "bZIP-transcription factor 52"; ref_gene_id "Zm00001d028936";
1	StringTie	exon	52168088	52168201	1000	-	.	gene_id "MSTRG.1510"; transcript_id "Zm00001d028936_T006"; exon_number "1"; gene_name "bZIP-transcription factor 52"; ref_gene_id "Zm00001d028936";
1	StringTie	transcript	52168088	52173614	1000	-	.	gene_id "MSTRG.1510"; transcript_id "Zm00001d028936_T007"; gene_name "bZIP-transcription factor 52"; ref_gene_id "Zm00001d028936";
1	StringTie	exon	52168088	52168201	1000	-	.	gene_id "MSTRG.1510"; transcript_id "Zm00001d028936_T007"; exon_number "1"; gene_name "bZIP-transcription factor 52"; ref_gene_id "Zm00001d028936";
1	StringTie	exon	52173399	52173614	1000	-	.	gene_id "MSTRG.1510"; transcript_id "Zm00001d028936_T007"; exon_number "2"; gene_name "bZIP-transcription factor 52"; ref_gene_id "Zm00001d028936";
1	StringTie	transcript	52168088	52173614	1000	-	.	gene_id "MSTRG.1510"; transcript_id "Zm00001d028936_T010"; gene_name "bZIP-transcription factor 52"; ref_gene_id "Zm00001d028936";
1	StringTie	exon	52168088	52168234	1000	-	.	gene_id "MSTRG.1510"; transcript_id "Zm00001d028936_T010"; exon_number "1"; gene_name "bZIP-transcription factor 52"; ref_gene_id "Zm00001d028936";
1	StringTie	exon	52168394	52168537	1000	-	.	gene_id "MSTRG.1510"; transcript_id "Zm00001d028936_T010"; exon_number "2"; gene_name "bZIP-transcription factor 52"; ref_gene_id "Zm00001d028936";
1	StringTie	exon	52170863	52170997	1000	-	.	gene_id "MSTRG.1510"; transcript_id "Zm00001d028936_T010"; exon_number "3"; gene_name "bZIP-transcription factor 52"; ref_gene_id "Zm00001d028936";
1	StringTie	exon	52173399	52173614	1000	-	.	gene_id "MSTRG.1510"; transcript_id "Zm00001d028936_T010"; exon_number "4"; gene_name "bZIP-transcription factor 52"; ref_gene_id "Zm00001d028936";
1	StringTie	transcript	52170863	52173614	1000	-	.	gene_id "MSTRG.1510"; transcript_id "Zm00001d028936_T011"; gene_name "bZIP-transcription factor 52"; ref_gene_id "Zm00001d028936";
1	StringTie	exon	52170863	52171021	1000	-	.	gene_id "MSTRG.1510"; transcript_id "Zm00001d028936_T011"; exon_number "1"; gene_name "bZIP-transcription factor 52"; ref_gene_id "Zm00001d028936";
1	StringTie	exon	52171889	52171954	1000	-	.	gene_id "MSTRG.1510"; transcript_id "Zm00001d028936_T011"; exon_number "2"; gene_name "bZIP-transcription factor 52"; ref_gene_id "Zm00001d028936";
1	StringTie	exon	52173399	52173614	1000	-	.	gene_id "MSTRG.1510"; transcript_id "Zm00001d028936_T011"; exon_number "3"; gene_name "bZIP-transcription factor 52"; ref_gene_id "Zm00001d028936";
1	StringTie	transcript	52173399	52173614	1000	-	.	gene_id "MSTRG.1510"; transcript_id "Zm00001d028936_T013"; gene_name "bZIP-transcription factor 52"; ref_gene_id "Zm00001d028936";
1	StringTie	exon	52173399	52173614	1000	-	.	gene_id "MSTRG.1510"; transcript_id "Zm00001d028936_T013"; exon_number "1"; gene_name "bZIP-transcription factor 52"; ref_gene_id "Zm00001d028936";
1	StringTie	transcript	52586578	52586902	1000	-	.	gene_id "MSTRG.1519"; transcript_id "Zm00001d028949_T003"; gene_name "calcineurin B-like-interacting protein kinase3"; ref_gene_id "Zm00001d028949";
1	StringTie	exon	52586578	52586902	1000	-	.	gene_id "MSTRG.1519"; transcript_id "Zm00001d028949_T003"; exon_number "1"; gene_name "calcineurin B-like-interacting protein kinase3"; ref_gene_id "Zm00001d028949";
1	StringTie	transcript	52939999	52943747	1000	-	.	gene_id "MSTRG.1530"; transcript_id "Zm00001d028960_T007"; gene_name "Zm00001d028960"; ref_gene_id "Zm00001d028960";
1	StringTie	exon	52939999	52940184	1000	-	.	gene_id "MSTRG.1530"; transcript_id "Zm00001d028960_T007"; exon_number "1"; gene_name "Zm00001d028960"; ref_gene_id "Zm00001d028960";
1	StringTie	exon	52943670	52943747	1000	-	.	gene_id "MSTRG.1530"; transcript_id "Zm00001d028960_T007"; exon_number "2"; gene_name "Zm00001d028960"; ref_gene_id "Zm00001d028960";
1	StringTie	transcript	52940956	52943747	1000	-	.	gene_id "MSTRG.1530"; transcript_id "Zm00001d028960_T009"; gene_name "Zm00001d028960"; ref_gene_id "Zm00001d028960";
1	StringTie	exon	52940956	52941087	1000	-	.	gene_id "MSTRG.1530"; transcript_id "Zm00001d028960_T009"; exon_number "1"; gene_name "Zm00001d028960"; ref_gene_id "Zm00001d028960";
1	StringTie	exon	52941210	52941347	1000	-	.	gene_id "MSTRG.1530"; transcript_id "Zm00001d028960_T009"; exon_number "2"; gene_name "Zm00001d028960"; ref_gene_id "Zm00001d028960";
1	StringTie	exon	52943670	52943747	1000	-	.	gene_id "MSTRG.1530"; transcript_id "Zm00001d028960_T009"; exon_number "3"; gene_name "Zm00001d028960"; ref_gene_id "Zm00001d028960";
1	StringTie	transcript	52943670	52943747	1000	-	.	gene_id "MSTRG.1530"; transcript_id "Zm00001d028960_T004"; gene_name "Zm00001d028960"; ref_gene_id "Zm00001d028960";
1	StringTie	exon	52943670	52943747	1000	-	.	gene_id "MSTRG.1530"; transcript_id "Zm00001d028960_T004"; exon_number "1"; gene_name "Zm00001d028960"; ref_gene_id "Zm00001d028960";
1	StringTie	transcript	53030873	53031112	1000	+	.	gene_id "MSTRG.1531"; transcript_id "Zm00001d028962_T001"; gene_name "WRKY-transcription factor 32"; ref_gene_id "Zm00001d028962";
1	StringTie	exon	53030873	53031112	1000	+	.	gene_id "MSTRG.1531"; transcript_id "Zm00001d028962_T001"; exon_number "1"; gene_name "WRKY-transcription factor 32"; ref_gene_id "Zm00001d028962";
1	StringTie	transcript	53142572	53144091	1000	+	.	gene_id "MSTRG.1532"; transcript_id "Zm00001d028963_T002"; gene_name "protein kinase inhibitor1"; ref_gene_id "Zm00001d028963";
1	StringTie	exon	53142572	53142627	1000	+	.	gene_id "MSTRG.1532"; transcript_id "Zm00001d028963_T002"; exon_number "1"; gene_name "protein kinase inhibitor1"; ref_gene_id "Zm00001d028963";
1	StringTie	exon	53143169	53143226	1000	+	.	gene_id "MSTRG.1532"; transcript_id "Zm00001d028963_T002"; exon_number "2"; gene_name "protein kinase inhibitor1"; ref_gene_id "Zm00001d028963";
1	StringTie	exon	53144055	53144091	1000	+	.	gene_id "MSTRG.1532"; transcript_id "Zm00001d028963_T002"; exon_number "3"; gene_name "protein kinase inhibitor1"; ref_gene_id "Zm00001d028963";
1	StringTie	transcript	53178181	53181012	1000	+	.	gene_id "MSTRG.1535"; transcript_id "Zm00001d028966_T004"; gene_name "Zm00001d028966"; ref_gene_id "Zm00001d028966";
1	StringTie	exon	53178181	53178321	1000	+	.	gene_id "MSTRG.1535"; transcript_id "Zm00001d028966_T004"; exon_number "1"; gene_name "Zm00001d028966"; ref_gene_id "Zm00001d028966";
1	StringTie	exon	53178427	53178588	1000	+	.	gene_id "MSTRG.1535"; transcript_id "Zm00001d028966_T004"; exon_number "2"; gene_name "Zm00001d028966"; ref_gene_id "Zm00001d028966";
1	StringTie	exon	53180539	53180550	1000	+	.	gene_id "MSTRG.1535"; transcript_id "Zm00001d028966_T004"; exon_number "3"; gene_name "Zm00001d028966"; ref_gene_id "Zm00001d028966";
1	StringTie	exon	53180640	53181012	1000	+	.	gene_id "MSTRG.1535"; transcript_id "Zm00001d028966_T004"; exon_number "4"; gene_name "Zm00001d028966"; ref_gene_id "Zm00001d028966";
1	StringTie	transcript	53185751	53186222	1000	+	.	gene_id "MSTRG.1536"; transcript_id "Zm00001d028967_T003"; gene_name "Zm00001d028967"; ref_gene_id "Zm00001d028967";
1	StringTie	exon	53185751	53186222	1000	+	.	gene_id "MSTRG.1536"; transcript_id "Zm00001d028967_T003"; exon_number "1"; gene_name "Zm00001d028967"; ref_gene_id "Zm00001d028967";
1	StringTie	transcript	53292903	53297275	1000	+	.	gene_id "MSTRG.1538"; transcript_id "Zm00001d028971_T004"; gene_name "Zm00001d028971"; ref_gene_id "Zm00001d028971";
1	StringTie	exon	53292903	53293148	1000	+	.	gene_id "MSTRG.1538"; transcript_id "Zm00001d028971_T004"; exon_number "1"; gene_name "Zm00001d028971"; ref_gene_id "Zm00001d028971";
1	StringTie	exon	53296625	53296717	1000	+	.	gene_id "MSTRG.1538"; transcript_id "Zm00001d028971_T004"; exon_number "2"; gene_name "Zm00001d028971"; ref_gene_id "Zm00001d028971";
1	StringTie	exon	53296810	53296905	1000	+	.	gene_id "MSTRG.1538"; transcript_id "Zm00001d028971_T004"; exon_number "3"; gene_name "Zm00001d028971"; ref_gene_id "Zm00001d028971";
1	StringTie	exon	53297000	53297045	1000	+	.	gene_id "MSTRG.1538"; transcript_id "Zm00001d028971_T004"; exon_number "4"; gene_name "Zm00001d028971"; ref_gene_id "Zm00001d028971";
1	StringTie	exon	53297210	53297275	1000	+	.	gene_id "MSTRG.1538"; transcript_id "Zm00001d028971_T004"; exon_number "5"; gene_name "Zm00001d028971"; ref_gene_id "Zm00001d028971";
1	StringTie	transcript	53461083	53461952	1000	-	.	gene_id "MSTRG.1546"; transcript_id "Zm00001d028981_T003"; gene_name "Zm00001d028981"; ref_gene_id "Zm00001d028981";
1	StringTie	exon	53461083	53461192	1000	-	.	gene_id "MSTRG.1546"; transcript_id "Zm00001d028981_T003"; exon_number "1"; gene_name "Zm00001d028981"; ref_gene_id "Zm00001d028981";
1	StringTie	exon	53461277	53461343	1000	-	.	gene_id "MSTRG.1546"; transcript_id "Zm00001d028981_T003"; exon_number "2"; gene_name "Zm00001d028981"; ref_gene_id "Zm00001d028981";
1	StringTie	exon	53461768	53461952	1000	-	.	gene_id "MSTRG.1546"; transcript_id "Zm00001d028981_T003"; exon_number "3"; gene_name "Zm00001d028981"; ref_gene_id "Zm00001d028981";
1	StringTie	transcript	53958300	53959267	1000	-	.	gene_id "MSTRG.1556"; transcript_id "Zm00001d028994_T013"; gene_name "Zm00001d028994"; ref_gene_id "Zm00001d028994";
1	StringTie	exon	53958300	53958341	1000	-	.	gene_id "MSTRG.1556"; transcript_id "Zm00001d028994_T013"; exon_number "1"; gene_name "Zm00001d028994"; ref_gene_id "Zm00001d028994";
1	StringTie	exon	53958478	53958550	1000	-	.	gene_id "MSTRG.1556"; transcript_id "Zm00001d028994_T013"; exon_number "2"; gene_name "Zm00001d028994"; ref_gene_id "Zm00001d028994";
1	StringTie	exon	53958839	53959267	1000	-	.	gene_id "MSTRG.1556"; transcript_id "Zm00001d028994_T013"; exon_number "3"; gene_name "Zm00001d028994"; ref_gene_id "Zm00001d028994";
1	StringTie	transcript	54452089	54452451	1000	+	.	gene_id "MSTRG.1565"; transcript_id "Zm00001d029004_T034"; gene_name "Zm00001d029004"; ref_gene_id "Zm00001d029004";
1	StringTie	exon	54452089	54452279	1000	+	.	gene_id "MSTRG.1565"; transcript_id "Zm00001d029004_T034"; exon_number "1"; gene_name "Zm00001d029004"; ref_gene_id "Zm00001d029004";
1	StringTie	exon	54452365	54452451	1000	+	.	gene_id "MSTRG.1565"; transcript_id "Zm00001d029004_T034"; exon_number "2"; gene_name "Zm00001d029004"; ref_gene_id "Zm00001d029004";
1	StringTie	transcript	54452089	54452451	1000	+	.	gene_id "MSTRG.1565"; transcript_id "Zm00001d029004_T042"; gene_name "Zm00001d029004"; ref_gene_id "Zm00001d029004";
1	StringTie	exon	54452089	54452279	1000	+	.	gene_id "MSTRG.1565"; transcript_id "Zm00001d029004_T042"; exon_number "1"; gene_name "Zm00001d029004"; ref_gene_id "Zm00001d029004";
1	StringTie	exon	54452368	54452451	1000	+	.	gene_id "MSTRG.1565"; transcript_id "Zm00001d029004_T042"; exon_number "2"; gene_name "Zm00001d029004"; ref_gene_id "Zm00001d029004";
1	StringTie	transcript	54452089	54452451	1000	+	.	gene_id "MSTRG.1565"; transcript_id "Zm00001d029004_T014"; gene_name "Zm00001d029004"; ref_gene_id "Zm00001d029004";
1	StringTie	exon	54452089	54452294	1000	+	.	gene_id "MSTRG.1565"; transcript_id "Zm00001d029004_T014"; exon_number "1"; gene_name "Zm00001d029004"; ref_gene_id "Zm00001d029004";
1	StringTie	exon	54452368	54452451	1000	+	.	gene_id "MSTRG.1565"; transcript_id "Zm00001d029004_T014"; exon_number "2"; gene_name "Zm00001d029004"; ref_gene_id "Zm00001d029004";
1	StringTie	transcript	54478146	54478642	1000	+	.	gene_id "MSTRG.1565"; transcript_id "Zm00001d029004_T123"; gene_name "Zm00001d029004"; ref_gene_id "Zm00001d029004";
1	StringTie	exon	54478146	54478438	1000	+	.	gene_id "MSTRG.1565"; transcript_id "Zm00001d029004_T123"; exon_number "1"; gene_name "Zm00001d029004"; ref_gene_id "Zm00001d029004";
1	StringTie	exon	54478620	54478642	1000	+	.	gene_id "MSTRG.1565"; transcript_id "Zm00001d029004_T123"; exon_number "2"; gene_name "Zm00001d029004"; ref_gene_id "Zm00001d029004";
1	StringTie	transcript	54938381	54938764	1000	-	.	gene_id "MSTRG.1571"; transcript_id "Zm00001d029014_T005"; gene_name "Zm00001d029014"; ref_gene_id "Zm00001d029014";
1	StringTie	exon	54938381	54938461	1000	-	.	gene_id "MSTRG.1571"; transcript_id "Zm00001d029014_T005"; exon_number "1"; gene_name "Zm00001d029014"; ref_gene_id "Zm00001d029014";
1	StringTie	exon	54938603	54938764	1000	-	.	gene_id "MSTRG.1571"; transcript_id "Zm00001d029014_T005"; exon_number "2"; gene_name "Zm00001d029014"; ref_gene_id "Zm00001d029014";
1	StringTie	transcript	54939667	54940130	1000	-	.	gene_id "MSTRG.1571"; transcript_id "Zm00001d029014_T001"; gene_name "Zm00001d029014"; ref_gene_id "Zm00001d029014";
1	StringTie	exon	54939667	54939819	1000	-	.	gene_id "MSTRG.1571"; transcript_id "Zm00001d029014_T001"; exon_number "1"; gene_name "Zm00001d029014"; ref_gene_id "Zm00001d029014";
1	StringTie	exon	54939935	54940130	1000	-	.	gene_id "MSTRG.1571"; transcript_id "Zm00001d029014_T001"; exon_number "2"; gene_name "Zm00001d029014"; ref_gene_id "Zm00001d029014";
1	StringTie	transcript	55370873	55371351	1000	+	.	gene_id "MSTRG.1583"; transcript_id "Zm00001d029030_T003"; gene_name "Zm00001d029030"; ref_gene_id "Zm00001d029030";
1	StringTie	exon	55370873	55371351	1000	+	.	gene_id "MSTRG.1583"; transcript_id "Zm00001d029030_T003"; exon_number "1"; gene_name "Zm00001d029030"; ref_gene_id "Zm00001d029030";
1	StringTie	transcript	55373051	55373338	1000	-	.	gene_id "MSTRG.1584"; transcript_id "Zm00001d029031_T003"; gene_name "Zm00001d029031"; ref_gene_id "Zm00001d029031";
1	StringTie	exon	55373051	55373338	1000	-	.	gene_id "MSTRG.1584"; transcript_id "Zm00001d029031_T003"; exon_number "1"; gene_name "Zm00001d029031"; ref_gene_id "Zm00001d029031";
1	StringTie	transcript	55561135	55561552	1000	-	.	gene_id "MSTRG.1588"; transcript_id "Zm00001d029036_T003"; gene_name "Zm00001d029036"; ref_gene_id "Zm00001d029036";
1	StringTie	exon	55561135	55561209	1000	-	.	gene_id "MSTRG.1588"; transcript_id "Zm00001d029036_T003"; exon_number "1"; gene_name "Zm00001d029036"; ref_gene_id "Zm00001d029036";
1	StringTie	exon	55561376	55561552	1000	-	.	gene_id "MSTRG.1588"; transcript_id "Zm00001d029036_T003"; exon_number "2"; gene_name "Zm00001d029036"; ref_gene_id "Zm00001d029036";
1	StringTie	transcript	55927786	55930882	1000	+	.	gene_id "MSTRG.1595"; transcript_id "Zm00001d029044_T004"; gene_name "Zm00001d029044"; ref_gene_id "Zm00001d029044";
1	StringTie	exon	55927786	55927888	1000	+	.	gene_id "MSTRG.1595"; transcript_id "Zm00001d029044_T004"; exon_number "1"; gene_name "Zm00001d029044"; ref_gene_id "Zm00001d029044";
1	StringTie	exon	55929386	55930882	1000	+	.	gene_id "MSTRG.1595"; transcript_id "Zm00001d029044_T004"; exon_number "2"; gene_name "Zm00001d029044"; ref_gene_id "Zm00001d029044";
1	StringTie	transcript	56109851	56110129	1000	-	.	gene_id "MSTRG.1601"; transcript_id "Zm00001d029050_T003"; gene_name "Zm00001d029050"; ref_gene_id "Zm00001d029050";
1	StringTie	exon	56109851	56109854	1000	-	.	gene_id "MSTRG.1601"; transcript_id "Zm00001d029050_T003"; exon_number "1"; gene_name "Zm00001d029050"; ref_gene_id "Zm00001d029050";
1	StringTie	exon	56109918	56110129	1000	-	.	gene_id "MSTRG.1601"; transcript_id "Zm00001d029050_T003"; exon_number "2"; gene_name "Zm00001d029050"; ref_gene_id "Zm00001d029050";
1	StringTie	transcript	56215383	56216478	1000	-	.	gene_id "MSTRG.1606"; transcript_id "Zm00001d029053_T009"; gene_name "Zm00001d029053"; ref_gene_id "Zm00001d029053";
1	StringTie	exon	56215383	56215517	1000	-	.	gene_id "MSTRG.1606"; transcript_id "Zm00001d029053_T009"; exon_number "1"; gene_name "Zm00001d029053"; ref_gene_id "Zm00001d029053";
1	StringTie	exon	56216188	56216478	1000	-	.	gene_id "MSTRG.1606"; transcript_id "Zm00001d029053_T009"; exon_number "2"; gene_name "Zm00001d029053"; ref_gene_id "Zm00001d029053";
1	StringTie	transcript	56215383	56216103	1000	-	.	gene_id "MSTRG.1606"; transcript_id "Zm00001d029053_T012"; gene_name "Zm00001d029053"; ref_gene_id "Zm00001d029053";
1	StringTie	exon	56215383	56215509	1000	-	.	gene_id "MSTRG.1606"; transcript_id "Zm00001d029053_T012"; exon_number "1"; gene_name "Zm00001d029053"; ref_gene_id "Zm00001d029053";
1	StringTie	exon	56215937	56216103	1000	-	.	gene_id "MSTRG.1606"; transcript_id "Zm00001d029053_T012"; exon_number "2"; gene_name "Zm00001d029053"; ref_gene_id "Zm00001d029053";
1	StringTie	transcript	56215383	56216478	1000	-	.	gene_id "MSTRG.1606"; transcript_id "Zm00001d029053_T017"; gene_name "Zm00001d029053"; ref_gene_id "Zm00001d029053";
1	StringTie	exon	56215383	56215509	1000	-	.	gene_id "MSTRG.1606"; transcript_id "Zm00001d029053_T017"; exon_number "1"; gene_name "Zm00001d029053"; ref_gene_id "Zm00001d029053";
1	StringTie	exon	56215937	56216103	1000	-	.	gene_id "MSTRG.1606"; transcript_id "Zm00001d029053_T017"; exon_number "2"; gene_name "Zm00001d029053"; ref_gene_id "Zm00001d029053";
1	StringTie	exon	56216188	56216478	1000	-	.	gene_id "MSTRG.1606"; transcript_id "Zm00001d029053_T017"; exon_number "3"; gene_name "Zm00001d029053"; ref_gene_id "Zm00001d029053";
1	StringTie	transcript	56216054	56216478	1000	-	.	gene_id "MSTRG.1606"; transcript_id "Zm00001d029053_T004"; gene_name "Zm00001d029053"; ref_gene_id "Zm00001d029053";
1	StringTie	exon	56216054	56216073	1000	-	.	gene_id "MSTRG.1606"; transcript_id "Zm00001d029053_T004"; exon_number "1"; gene_name "Zm00001d029053"; ref_gene_id "Zm00001d029053";
1	StringTie	exon	56216220	56216478	1000	-	.	gene_id "MSTRG.1606"; transcript_id "Zm00001d029053_T004"; exon_number "2"; gene_name "Zm00001d029053"; ref_gene_id "Zm00001d029053";
1	StringTie	transcript	56698571	56700079	1000	+	.	gene_id "MSTRG.1608"; transcript_id "Zm00001d029056_T004"; gene_name "Zm00001d029056"; ref_gene_id "Zm00001d029056";
1	StringTie	exon	56698571	56698604	1000	+	.	gene_id "MSTRG.1608"; transcript_id "Zm00001d029056_T004"; exon_number "1"; gene_name "Zm00001d029056"; ref_gene_id "Zm00001d029056";
1	StringTie	exon	56699325	56699434	1000	+	.	gene_id "MSTRG.1608"; transcript_id "Zm00001d029056_T004"; exon_number "2"; gene_name "Zm00001d029056"; ref_gene_id "Zm00001d029056";
1	StringTie	exon	56699582	56700079	1000	+	.	gene_id "MSTRG.1608"; transcript_id "Zm00001d029056_T004"; exon_number "3"; gene_name "Zm00001d029056"; ref_gene_id "Zm00001d029056";
1	StringTie	transcript	56743274	56743338	1000	+	.	gene_id "MSTRG.1611"; transcript_id "Zm00001d029059_T001"; gene_name "Zm00001d029059"; ref_gene_id "Zm00001d029059";
1	StringTie	exon	56743274	56743338	1000	+	.	gene_id "MSTRG.1611"; transcript_id "Zm00001d029059_T001"; exon_number "1"; gene_name "Zm00001d029059"; ref_gene_id "Zm00001d029059";
1	StringTie	transcript	56979086	56979421	1000	+	.	gene_id "MSTRG.1618"; transcript_id "Zm00001d029066_T021"; gene_name "Zm00001d029066"; ref_gene_id "Zm00001d029066";
1	StringTie	exon	56979086	56979421	1000	+	.	gene_id "MSTRG.1618"; transcript_id "Zm00001d029066_T021"; exon_number "1"; gene_name "Zm00001d029066"; ref_gene_id "Zm00001d029066";
1	StringTie	transcript	57134393	57135119	1000	+	.	gene_id "MSTRG.1622"; transcript_id "Zm00001d029072_T008"; gene_name "Zm00001d029072"; ref_gene_id "Zm00001d029072";
1	StringTie	exon	57134393	57134431	1000	+	.	gene_id "MSTRG.1622"; transcript_id "Zm00001d029072_T008"; exon_number "1"; gene_name "Zm00001d029072"; ref_gene_id "Zm00001d029072";
1	StringTie	exon	57134532	57134725	1000	+	.	gene_id "MSTRG.1622"; transcript_id "Zm00001d029072_T008"; exon_number "2"; gene_name "Zm00001d029072"; ref_gene_id "Zm00001d029072";
1	StringTie	exon	57134870	57135119	1000	+	.	gene_id "MSTRG.1622"; transcript_id "Zm00001d029072_T008"; exon_number "3"; gene_name "Zm00001d029072"; ref_gene_id "Zm00001d029072";
1	StringTie	transcript	57396867	57397707	1000	+	.	gene_id "MSTRG.1632"; transcript_id "Zm00001d029083_T002"; gene_name "Zm00001d029083"; ref_gene_id "Zm00001d029083";
1	StringTie	exon	57396867	57396951	1000	+	.	gene_id "MSTRG.1632"; transcript_id "Zm00001d029083_T002"; exon_number "1"; gene_name "Zm00001d029083"; ref_gene_id "Zm00001d029083";
1	StringTie	exon	57397085	57397171	1000	+	.	gene_id "MSTRG.1632"; transcript_id "Zm00001d029083_T002"; exon_number "2"; gene_name "Zm00001d029083"; ref_gene_id "Zm00001d029083";
1	StringTie	exon	57397375	57397707	1000	+	.	gene_id "MSTRG.1632"; transcript_id "Zm00001d029083_T002"; exon_number "3"; gene_name "Zm00001d029083"; ref_gene_id "Zm00001d029083";
1	StringTie	transcript	57451547	57452595	1000	+	.	gene_id "MSTRG.1633"; transcript_id "Zm00001d029084_T005"; gene_name "Zm00001d029084"; ref_gene_id "Zm00001d029084";
1	StringTie	exon	57451547	57451570	1000	+	.	gene_id "MSTRG.1633"; transcript_id "Zm00001d029084_T005"; exon_number "1"; gene_name "Zm00001d029084"; ref_gene_id "Zm00001d029084";
1	StringTie	exon	57451659	57451724	1000	+	.	gene_id "MSTRG.1633"; transcript_id "Zm00001d029084_T005"; exon_number "2"; gene_name "Zm00001d029084"; ref_gene_id "Zm00001d029084";
1	StringTie	exon	57452038	57452595	1000	+	.	gene_id "MSTRG.1633"; transcript_id "Zm00001d029084_T005"; exon_number "3"; gene_name "Zm00001d029084"; ref_gene_id "Zm00001d029084";
1	StringTie	transcript	57457862	57458357	1000	-	.	gene_id "MSTRG.1636"; transcript_id "Zm00001d029087_T001"; gene_name "Zm00001d029087"; ref_gene_id "Zm00001d029087";
1	StringTie	exon	57457862	57457900	1000	-	.	gene_id "MSTRG.1636"; transcript_id "Zm00001d029087_T001"; exon_number "1"; gene_name "Zm00001d029087"; ref_gene_id "Zm00001d029087";
1	StringTie	exon	57458022	57458160	1000	-	.	gene_id "MSTRG.1636"; transcript_id "Zm00001d029087_T001"; exon_number "2"; gene_name "Zm00001d029087"; ref_gene_id "Zm00001d029087";
1	StringTie	exon	57458242	57458357	1000	-	.	gene_id "MSTRG.1636"; transcript_id "Zm00001d029087_T001"; exon_number "3"; gene_name "Zm00001d029087"; ref_gene_id "Zm00001d029087";
1	StringTie	transcript	57486293	57486787	1000	-	.	gene_id "MSTRG.1640"; transcript_id "Zm00001d029091_T001"; gene_name "sucrose synthase2"; ref_gene_id "Zm00001d029091";
1	StringTie	exon	57486293	57486331	1000	-	.	gene_id "MSTRG.1640"; transcript_id "Zm00001d029091_T001"; exon_number "1"; gene_name "sucrose synthase2"; ref_gene_id "Zm00001d029091";
1	StringTie	exon	57486448	57486586	1000	-	.	gene_id "MSTRG.1640"; transcript_id "Zm00001d029091_T001"; exon_number "2"; gene_name "sucrose synthase2"; ref_gene_id "Zm00001d029091";
1	StringTie	exon	57486672	57486787	1000	-	.	gene_id "MSTRG.1640"; transcript_id "Zm00001d029091_T001"; exon_number "3"; gene_name "sucrose synthase2"; ref_gene_id "Zm00001d029091";
1	StringTie	transcript	57490664	57491494	1000	-	.	gene_id "MSTRG.1640"; transcript_id "Zm00001d029091_T013"; gene_name "sucrose synthase2"; ref_gene_id "Zm00001d029091";
1	StringTie	exon	57490664	57490706	1000	-	.	gene_id "MSTRG.1640"; transcript_id "Zm00001d029091_T013"; exon_number "1"; gene_name "sucrose synthase2"; ref_gene_id "Zm00001d029091";
1	StringTie	exon	57491079	57491197	1000	-	.	gene_id "MSTRG.1640"; transcript_id "Zm00001d029091_T013"; exon_number "2"; gene_name "sucrose synthase2"; ref_gene_id "Zm00001d029091";
1	StringTie	exon	57491302	57491494	1000	-	.	gene_id "MSTRG.1640"; transcript_id "Zm00001d029091_T013"; exon_number "3"; gene_name "sucrose synthase2"; ref_gene_id "Zm00001d029091";
1	StringTie	transcript	57491075	57491494	1000	-	.	gene_id "MSTRG.1640"; transcript_id "Zm00001d029091_T006"; gene_name "sucrose synthase2"; ref_gene_id "Zm00001d029091";
1	StringTie	exon	57491075	57491197	1000	-	.	gene_id "MSTRG.1640"; transcript_id "Zm00001d029091_T006"; exon_number "1"; gene_name "sucrose synthase2"; ref_gene_id "Zm00001d029091";
1	StringTie	exon	57491302	57491494	1000	-	.	gene_id "MSTRG.1640"; transcript_id "Zm00001d029091_T006"; exon_number "2"; gene_name "sucrose synthase2"; ref_gene_id "Zm00001d029091";
1	StringTie	transcript	58018611	58018889	1000	+	.	gene_id "MSTRG.1648"; transcript_id "Zm00001d029100_T001"; gene_name "Zm00001d029100"; ref_gene_id "Zm00001d029100";
1	StringTie	exon	58018611	58018889	1000	+	.	gene_id "MSTRG.1648"; transcript_id "Zm00001d029100_T001"; exon_number "1"; gene_name "Zm00001d029100"; ref_gene_id "Zm00001d029100";
1	StringTie	transcript	58743023	58743136	1000	-	.	gene_id "MSTRG.1666"; transcript_id "Zm00001d029120_T031"; gene_name "Zm00001d029120"; ref_gene_id "Zm00001d029120";
1	StringTie	exon	58743023	58743136	1000	-	.	gene_id "MSTRG.1666"; transcript_id "Zm00001d029120_T031"; exon_number "1"; gene_name "Zm00001d029120"; ref_gene_id "Zm00001d029120";
1	StringTie	transcript	58743023	58744045	1000	-	.	gene_id "MSTRG.1666"; transcript_id "Zm00001d029120_T005"; gene_name "Zm00001d029120"; ref_gene_id "Zm00001d029120";
1	StringTie	exon	58743023	58743136	1000	-	.	gene_id "MSTRG.1666"; transcript_id "Zm00001d029120_T005"; exon_number "1"; gene_name "Zm00001d029120"; ref_gene_id "Zm00001d029120";
1	StringTie	exon	58743758	58744045	1000	-	.	gene_id "MSTRG.1666"; transcript_id "Zm00001d029120_T005"; exon_number "2"; gene_name "Zm00001d029120"; ref_gene_id "Zm00001d029120";
1	StringTie	transcript	58746766	58747201	1000	-	.	gene_id "MSTRG.1666"; transcript_id "Zm00001d029120_T014"; gene_name "Zm00001d029120"; ref_gene_id "Zm00001d029120";
1	StringTie	exon	58746766	58746921	1000	-	.	gene_id "MSTRG.1666"; transcript_id "Zm00001d029120_T014"; exon_number "1"; gene_name "Zm00001d029120"; ref_gene_id "Zm00001d029120";
1	StringTie	exon	58747043	58747201	1000	-	.	gene_id "MSTRG.1666"; transcript_id "Zm00001d029120_T014"; exon_number "2"; gene_name "Zm00001d029120"; ref_gene_id "Zm00001d029120";
1	StringTie	transcript	58947523	58947936	1000	-	.	gene_id "MSTRG.1667"; transcript_id "Zm00001d029121_T004"; gene_name "Zm00001d029121"; ref_gene_id "Zm00001d029121";
1	StringTie	exon	58947523	58947624	1000	-	.	gene_id "MSTRG.1667"; transcript_id "Zm00001d029121_T004"; exon_number "1"; gene_name "Zm00001d029121"; ref_gene_id "Zm00001d029121";
1	StringTie	exon	58947814	58947936	1000	-	.	gene_id "MSTRG.1667"; transcript_id "Zm00001d029121_T004"; exon_number "2"; gene_name "Zm00001d029121"; ref_gene_id "Zm00001d029121";
1	StringTie	transcript	59029558	59030243	1000	+	.	gene_id "MSTRG.1670"; transcript_id "Zm00001d029124_T002"; gene_name "RPS21"; ref_gene_id "Zm00001d029124";
1	StringTie	exon	59029558	59029607	1000	+	.	gene_id "MSTRG.1670"; transcript_id "Zm00001d029124_T002"; exon_number "1"; gene_name "RPS21"; ref_gene_id "Zm00001d029124";
1	StringTie	exon	59029694	59029826	1000	+	.	gene_id "MSTRG.1670"; transcript_id "Zm00001d029124_T002"; exon_number "2"; gene_name "RPS21"; ref_gene_id "Zm00001d029124";
1	StringTie	exon	59030159	59030243	1000	+	.	gene_id "MSTRG.1670"; transcript_id "Zm00001d029124_T002"; exon_number "3"; gene_name "RPS21"; ref_gene_id "Zm00001d029124";
1	StringTie	transcript	59773231	59773456	1000	+	.	gene_id "MSTRG.1678"; transcript_id "Zm00001d029133_T001"; gene_name "Zm00001d029133"; ref_gene_id "Zm00001d029133";
1	StringTie	exon	59773231	59773456	1000	+	.	gene_id "MSTRG.1678"; transcript_id "Zm00001d029133_T001"; exon_number "1"; gene_name "Zm00001d029133"; ref_gene_id "Zm00001d029133";
1	StringTie	transcript	59778150	59778251	1000	+	.	gene_id "MSTRG.1678"; transcript_id "Zm00001d029133_T017"; gene_name "Zm00001d029133"; ref_gene_id "Zm00001d029133";
1	StringTie	exon	59778150	59778251	1000	+	.	gene_id "MSTRG.1678"; transcript_id "Zm00001d029133_T017"; exon_number "1"; gene_name "Zm00001d029133"; ref_gene_id "Zm00001d029133";
1	StringTie	transcript	59778150	59786192	1000	+	.	gene_id "MSTRG.1678"; transcript_id "Zm00001d029133_T019"; gene_name "Zm00001d029133"; ref_gene_id "Zm00001d029133";
1	StringTie	exon	59778150	59778251	1000	+	.	gene_id "MSTRG.1678"; transcript_id "Zm00001d029133_T019"; exon_number "1"; gene_name "Zm00001d029133"; ref_gene_id "Zm00001d029133";
1	StringTie	exon	59784820	59784857	1000	+	.	gene_id "MSTRG.1678"; transcript_id "Zm00001d029133_T019"; exon_number "2"; gene_name "Zm00001d029133"; ref_gene_id "Zm00001d029133";
1	StringTie	exon	59785158	59785269	1000	+	.	gene_id "MSTRG.1678"; transcript_id "Zm00001d029133_T019"; exon_number "3"; gene_name "Zm00001d029133"; ref_gene_id "Zm00001d029133";
1	StringTie	exon	59785549	59786192	1000	+	.	gene_id "MSTRG.1678"; transcript_id "Zm00001d029133_T019"; exon_number "4"; gene_name "Zm00001d029133"; ref_gene_id "Zm00001d029133";
1	StringTie	transcript	59780782	59783195	1000	+	.	gene_id "MSTRG.1678"; transcript_id "Zm00001d029133_T025"; gene_name "Zm00001d029133"; ref_gene_id "Zm00001d029133";
1	StringTie	exon	59780782	59780868	1000	+	.	gene_id "MSTRG.1678"; transcript_id "Zm00001d029133_T025"; exon_number "1"; gene_name "Zm00001d029133"; ref_gene_id "Zm00001d029133";
1	StringTie	exon	59781515	59783195	1000	+	.	gene_id "MSTRG.1678"; transcript_id "Zm00001d029133_T025"; exon_number "2"; gene_name "Zm00001d029133"; ref_gene_id "Zm00001d029133";
1	StringTie	transcript	60227269	60227698	1000	-	.	gene_id "MSTRG.1685"; transcript_id "Zm00001d029140_T003"; gene_name "asg75"; ref_gene_id "Zm00001d029140";
1	StringTie	exon	60227269	60227392	1000	-	.	gene_id "MSTRG.1685"; transcript_id "Zm00001d029140_T003"; exon_number "1"; gene_name "asg75"; ref_gene_id "Zm00001d029140";
1	StringTie	exon	60227485	60227552	1000	-	.	gene_id "MSTRG.1685"; transcript_id "Zm00001d029140_T003"; exon_number "2"; gene_name "asg75"; ref_gene_id "Zm00001d029140";
1	StringTie	exon	60227651	60227698	1000	-	.	gene_id "MSTRG.1685"; transcript_id "Zm00001d029140_T003"; exon_number "3"; gene_name "asg75"; ref_gene_id "Zm00001d029140";
1	StringTie	transcript	60323301	60324109	1000	-	.	gene_id "MSTRG.1686"; transcript_id "Zm00001d029141_T006"; gene_name "Zm00001d029141"; ref_gene_id "Zm00001d029141";
1	StringTie	exon	60323301	60323423	1000	-	.	gene_id "MSTRG.1686"; transcript_id "Zm00001d029141_T006"; exon_number "1"; gene_name "Zm00001d029141"; ref_gene_id "Zm00001d029141";
1	StringTie	exon	60323697	60323726	1000	-	.	gene_id "MSTRG.1686"; transcript_id "Zm00001d029141_T006"; exon_number "2"; gene_name "Zm00001d029141"; ref_gene_id "Zm00001d029141";
1	StringTie	exon	60323822	60323891	1000	-	.	gene_id "MSTRG.1686"; transcript_id "Zm00001d029141_T006"; exon_number "3"; gene_name "Zm00001d029141"; ref_gene_id "Zm00001d029141";
1	StringTie	exon	60324018	60324109	1000	-	.	gene_id "MSTRG.1686"; transcript_id "Zm00001d029141_T006"; exon_number "4"; gene_name "Zm00001d029141"; ref_gene_id "Zm00001d029141";
1	StringTie	transcript	60428022	60430889	1000	-	.	gene_id "MSTRG.1689"; transcript_id "Zm00001d029144_T008"; gene_name "Zm00001d029144"; ref_gene_id "Zm00001d029144";
1	StringTie	exon	60428022	60428222	1000	-	.	gene_id "MSTRG.1689"; transcript_id "Zm00001d029144_T008"; exon_number "1"; gene_name "Zm00001d029144"; ref_gene_id "Zm00001d029144";
1	StringTie	exon	60429908	60430123	1000	-	.	gene_id "MSTRG.1689"; transcript_id "Zm00001d029144_T008"; exon_number "2"; gene_name "Zm00001d029144"; ref_gene_id "Zm00001d029144";
1	StringTie	exon	60430620	60430688	1000	-	.	gene_id "MSTRG.1689"; transcript_id "Zm00001d029144_T008"; exon_number "3"; gene_name "Zm00001d029144"; ref_gene_id "Zm00001d029144";
1	StringTie	exon	60430700	60430889	1000	-	.	gene_id "MSTRG.1689"; transcript_id "Zm00001d029144_T008"; exon_number "4"; gene_name "Zm00001d029144"; ref_gene_id "Zm00001d029144";
1	StringTie	transcript	60430540	60430889	1000	-	.	gene_id "MSTRG.1689"; transcript_id "Zm00001d029144_T005"; gene_name "Zm00001d029144"; ref_gene_id "Zm00001d029144";
1	StringTie	exon	60430540	60430569	1000	-	.	gene_id "MSTRG.1689"; transcript_id "Zm00001d029144_T005"; exon_number "1"; gene_name "Zm00001d029144"; ref_gene_id "Zm00001d029144";
1	StringTie	exon	60430620	60430661	1000	-	.	gene_id "MSTRG.1689"; transcript_id "Zm00001d029144_T005"; exon_number "2"; gene_name "Zm00001d029144"; ref_gene_id "Zm00001d029144";
1	StringTie	exon	60430778	60430889	1000	-	.	gene_id "MSTRG.1689"; transcript_id "Zm00001d029144_T005"; exon_number "3"; gene_name "Zm00001d029144"; ref_gene_id "Zm00001d029144";
1	StringTie	transcript	60743504	60744630	1000	+	.	gene_id "MSTRG.1696"; transcript_id "Zm00001d029151_T003"; gene_name "Zm00001d029151"; ref_gene_id "Zm00001d029151";
1	StringTie	exon	60743504	60744630	1000	+	.	gene_id "MSTRG.1696"; transcript_id "Zm00001d029151_T003"; exon_number "1"; gene_name "Zm00001d029151"; ref_gene_id "Zm00001d029151";
1	StringTie	transcript	60743504	60745699	1000	+	.	gene_id "MSTRG.1696"; transcript_id "Zm00001d029151_T001"; gene_name "Zm00001d029151"; ref_gene_id "Zm00001d029151";
1	StringTie	exon	60743504	60743698	1000	+	.	gene_id "MSTRG.1696"; transcript_id "Zm00001d029151_T001"; exon_number "1"; gene_name "Zm00001d029151"; ref_gene_id "Zm00001d029151";
1	StringTie	exon	60744631	60745699	1000	+	.	gene_id "MSTRG.1696"; transcript_id "Zm00001d029151_T001"; exon_number "2"; gene_name "Zm00001d029151"; ref_gene_id "Zm00001d029151";
1	StringTie	transcript	60933021	60934311	1000	+	.	gene_id "MSTRG.1713"; transcript_id "Zm00001d029170_T007"; gene_name "superoxide dismutase4"; ref_gene_id "Zm00001d029170";
1	StringTie	exon	60933021	60933098	1000	+	.	gene_id "MSTRG.1713"; transcript_id "Zm00001d029170_T007"; exon_number "1"; gene_name "superoxide dismutase4"; ref_gene_id "Zm00001d029170";
1	StringTie	exon	60933177	60933252	1000	+	.	gene_id "MSTRG.1713"; transcript_id "Zm00001d029170_T007"; exon_number "2"; gene_name "superoxide dismutase4"; ref_gene_id "Zm00001d029170";
1	StringTie	exon	60933894	60933947	1000	+	.	gene_id "MSTRG.1713"; transcript_id "Zm00001d029170_T007"; exon_number "3"; gene_name "superoxide dismutase4"; ref_gene_id "Zm00001d029170";
1	StringTie	exon	60934054	60934311	1000	+	.	gene_id "MSTRG.1713"; transcript_id "Zm00001d029170_T007"; exon_number "4"; gene_name "superoxide dismutase4"; ref_gene_id "Zm00001d029170";
1	StringTie	transcript	60948958	60950358	1000	+	.	gene_id "MSTRG.1716"; transcript_id "Zm00001d029173_T003"; gene_name "Zm00001d029173"; ref_gene_id "Zm00001d029173";
1	StringTie	exon	60948958	60949029	1000	+	.	gene_id "MSTRG.1716"; transcript_id "Zm00001d029173_T003"; exon_number "1"; gene_name "Zm00001d029173"; ref_gene_id "Zm00001d029173";
1	StringTie	exon	60949387	60949468	1000	+	.	gene_id "MSTRG.1716"; transcript_id "Zm00001d029173_T003"; exon_number "2"; gene_name "Zm00001d029173"; ref_gene_id "Zm00001d029173";
1	StringTie	exon	60950236	60950358	1000	+	.	gene_id "MSTRG.1716"; transcript_id "Zm00001d029173_T003"; exon_number "3"; gene_name "Zm00001d029173"; ref_gene_id "Zm00001d029173";
1	StringTie	transcript	61574373	61574795	1000	-	.	gene_id "MSTRG.1729"; transcript_id "Zm00001d029189_T002"; gene_name "Zm00001d029189"; ref_gene_id "Zm00001d029189";
1	StringTie	exon	61574373	61574795	1000	-	.	gene_id "MSTRG.1729"; transcript_id "Zm00001d029189_T002"; exon_number "1"; gene_name "Zm00001d029189"; ref_gene_id "Zm00001d029189";
1	StringTie	transcript	61777169	61778672	1000	+	.	gene_id "MSTRG.1735"; transcript_id "Zm00001d029195_T003"; gene_name "terpene synthase8"; ref_gene_id "Zm00001d029195";
1	StringTie	exon	61777169	61778672	1000	+	.	gene_id "MSTRG.1735"; transcript_id "Zm00001d029195_T003"; exon_number "1"; gene_name "terpene synthase8"; ref_gene_id "Zm00001d029195";
1	StringTie	transcript	61904377	61906749	1000	-	.	gene_id "MSTRG.1738"; transcript_id "Zm00001d029198_T002"; gene_name "Zm00001d029198"; ref_gene_id "Zm00001d029198";
1	StringTie	exon	61904377	61904561	1000	-	.	gene_id "MSTRG.1738"; transcript_id "Zm00001d029198_T002"; exon_number "1"; gene_name "Zm00001d029198"; ref_gene_id "Zm00001d029198";
1	StringTie	exon	61904788	61904806	1000	-	.	gene_id "MSTRG.1738"; transcript_id "Zm00001d029198_T002"; exon_number "2"; gene_name "Zm00001d029198"; ref_gene_id "Zm00001d029198";
1	StringTie	exon	61906437	61906749	1000	-	.	gene_id "MSTRG.1738"; transcript_id "Zm00001d029198_T002"; exon_number "3"; gene_name "Zm00001d029198"; ref_gene_id "Zm00001d029198";
1	StringTie	transcript	61904377	61904551	1000	-	.	gene_id "MSTRG.1738"; transcript_id "Zm00001d029198_T003"; gene_name "Zm00001d029198"; ref_gene_id "Zm00001d029198";
1	StringTie	exon	61904377	61904551	1000	-	.	gene_id "MSTRG.1738"; transcript_id "Zm00001d029198_T003"; exon_number "1"; gene_name "Zm00001d029198"; ref_gene_id "Zm00001d029198";
1	StringTie	transcript	61904377	61904879	1000	-	.	gene_id "MSTRG.1738"; transcript_id "Zm00001d029198_T001"; gene_name "Zm00001d029198"; ref_gene_id "Zm00001d029198";
1	StringTie	exon	61904377	61904561	1000	-	.	gene_id "MSTRG.1738"; transcript_id "Zm00001d029198_T001"; exon_number "1"; gene_name "Zm00001d029198"; ref_gene_id "Zm00001d029198";
1	StringTie	exon	61904788	61904879	1000	-	.	gene_id "MSTRG.1738"; transcript_id "Zm00001d029198_T001"; exon_number "2"; gene_name "Zm00001d029198"; ref_gene_id "Zm00001d029198";
1	StringTie	transcript	62217184	62217504	1000	-	.	gene_id "MSTRG.1744"; transcript_id "Zm00001d029203_T003"; gene_name "Zm00001d029203"; ref_gene_id "Zm00001d029203";
1	StringTie	exon	62217184	62217504	1000	-	.	gene_id "MSTRG.1744"; transcript_id "Zm00001d029203_T003"; exon_number "1"; gene_name "Zm00001d029203"; ref_gene_id "Zm00001d029203";
1	StringTie	transcript	62414917	62417139	1000	+	.	gene_id "MSTRG.1746"; transcript_id "Zm00001d029206_T007"; gene_name "Zm00001d029206"; ref_gene_id "Zm00001d029206";
1	StringTie	exon	62414917	62415039	1000	+	.	gene_id "MSTRG.1746"; transcript_id "Zm00001d029206_T007"; exon_number "1"; gene_name "Zm00001d029206"; ref_gene_id "Zm00001d029206";
1	StringTie	exon	62415367	62415369	1000	+	.	gene_id "MSTRG.1746"; transcript_id "Zm00001d029206_T007"; exon_number "2"; gene_name "Zm00001d029206"; ref_gene_id "Zm00001d029206";
1	StringTie	exon	62416378	62416478	1000	+	.	gene_id "MSTRG.1746"; transcript_id "Zm00001d029206_T007"; exon_number "3"; gene_name "Zm00001d029206"; ref_gene_id "Zm00001d029206";
1	StringTie	exon	62416557	62417139	1000	+	.	gene_id "MSTRG.1746"; transcript_id "Zm00001d029206_T007"; exon_number "4"; gene_name "Zm00001d029206"; ref_gene_id "Zm00001d029206";
1	StringTie	transcript	62415367	62417139	1000	+	.	gene_id "MSTRG.1746"; transcript_id "Zm00001d029206_T004"; gene_name "Zm00001d029206"; ref_gene_id "Zm00001d029206";
1	StringTie	exon	62415367	62415369	1000	+	.	gene_id "MSTRG.1746"; transcript_id "Zm00001d029206_T004"; exon_number "1"; gene_name "Zm00001d029206"; ref_gene_id "Zm00001d029206";
1	StringTie	exon	62416378	62416478	1000	+	.	gene_id "MSTRG.1746"; transcript_id "Zm00001d029206_T004"; exon_number "2"; gene_name "Zm00001d029206"; ref_gene_id "Zm00001d029206";
1	StringTie	exon	62416557	62417139	1000	+	.	gene_id "MSTRG.1746"; transcript_id "Zm00001d029206_T004"; exon_number "3"; gene_name "Zm00001d029206"; ref_gene_id "Zm00001d029206";
1	StringTie	transcript	62510872	62510913	1000	-	.	gene_id "MSTRG.1754"; transcript_id "Zm00001d029214_T005"; gene_name "Zm00001d029214"; ref_gene_id "Zm00001d029214";
1	StringTie	exon	62510872	62510913	1000	-	.	gene_id "MSTRG.1754"; transcript_id "Zm00001d029214_T005"; exon_number "1"; gene_name "Zm00001d029214"; ref_gene_id "Zm00001d029214";
1	StringTie	transcript	62510872	62515726	1000	-	.	gene_id "MSTRG.1754"; transcript_id "Zm00001d029214_T006"; gene_name "Zm00001d029214"; ref_gene_id "Zm00001d029214";
1	StringTie	exon	62510872	62510913	1000	-	.	gene_id "MSTRG.1754"; transcript_id "Zm00001d029214_T006"; exon_number "1"; gene_name "Zm00001d029214"; ref_gene_id "Zm00001d029214";
1	StringTie	exon	62512186	62515726	1000	-	.	gene_id "MSTRG.1754"; transcript_id "Zm00001d029214_T006"; exon_number "2"; gene_name "Zm00001d029214"; ref_gene_id "Zm00001d029214";
1	StringTie	transcript	62738627	62739088	1000	+	.	gene_id "MSTRG.1755"; transcript_id "Zm00001d029215_T017"; gene_name "Zm00001d029215"; ref_gene_id "Zm00001d029215";
1	StringTie	exon	62738627	62739088	1000	+	.	gene_id "MSTRG.1755"; transcript_id "Zm00001d029215_T017"; exon_number "1"; gene_name "Zm00001d029215"; ref_gene_id "Zm00001d029215";
1	StringTie	transcript	63026064	63026929	1000	-	.	gene_id "MSTRG.1762"; transcript_id "Zm00001d029223_T004"; gene_name "Zm00001d029223"; ref_gene_id "Zm00001d029223";
1	StringTie	exon	63026064	63026089	1000	-	.	gene_id "MSTRG.1762"; transcript_id "Zm00001d029223_T004"; exon_number "1"; gene_name "Zm00001d029223"; ref_gene_id "Zm00001d029223";
1	StringTie	exon	63026750	63026929	1000	-	.	gene_id "MSTRG.1762"; transcript_id "Zm00001d029223_T004"; exon_number "2"; gene_name "Zm00001d029223"; ref_gene_id "Zm00001d029223";
1	StringTie	transcript	63276018	63277458	1000	-	.	gene_id "MSTRG.1772"; transcript_id "Zm00001d029234_T008"; gene_name "Zm00001d029234"; ref_gene_id "Zm00001d029234";
1	StringTie	exon	63276018	63276079	1000	-	.	gene_id "MSTRG.1772"; transcript_id "Zm00001d029234_T008"; exon_number "1"; gene_name "Zm00001d029234"; ref_gene_id "Zm00001d029234";
1	StringTie	exon	63276229	63276331	1000	-	.	gene_id "MSTRG.1772"; transcript_id "Zm00001d029234_T008"; exon_number "2"; gene_name "Zm00001d029234"; ref_gene_id "Zm00001d029234";
1	StringTie	exon	63276421	63276465	1000	-	.	gene_id "MSTRG.1772"; transcript_id "Zm00001d029234_T008"; exon_number "3"; gene_name "Zm00001d029234"; ref_gene_id "Zm00001d029234";
1	StringTie	exon	63277370	63277458	1000	-	.	gene_id "MSTRG.1772"; transcript_id "Zm00001d029234_T008"; exon_number "4"; gene_name "Zm00001d029234"; ref_gene_id "Zm00001d029234";
1	StringTie	transcript	63277853	63278166	1000	-	.	gene_id "MSTRG.1772"; transcript_id "Zm00001d029234_T002"; gene_name "Zm00001d029234"; ref_gene_id "Zm00001d029234";
1	StringTie	exon	63277853	63277939	1000	-	.	gene_id "MSTRG.1772"; transcript_id "Zm00001d029234_T002"; exon_number "1"; gene_name "Zm00001d029234"; ref_gene_id "Zm00001d029234";
1	StringTie	exon	63278019	63278166	1000	-	.	gene_id "MSTRG.1772"; transcript_id "Zm00001d029234_T002"; exon_number "2"; gene_name "Zm00001d029234"; ref_gene_id "Zm00001d029234";
1	StringTie	transcript	63277853	63278727	1000	-	.	gene_id "MSTRG.1772"; transcript_id "Zm00001d029234_T010"; gene_name "Zm00001d029234"; ref_gene_id "Zm00001d029234";
1	StringTie	exon	63277853	63277939	1000	-	.	gene_id "MSTRG.1772"; transcript_id "Zm00001d029234_T010"; exon_number "1"; gene_name "Zm00001d029234"; ref_gene_id "Zm00001d029234";
1	StringTie	exon	63278019	63278112	1000	-	.	gene_id "MSTRG.1772"; transcript_id "Zm00001d029234_T010"; exon_number "2"; gene_name "Zm00001d029234"; ref_gene_id "Zm00001d029234";
1	StringTie	exon	63278653	63278727	1000	-	.	gene_id "MSTRG.1772"; transcript_id "Zm00001d029234_T010"; exon_number "3"; gene_name "Zm00001d029234"; ref_gene_id "Zm00001d029234";
1	StringTie	transcript	63277853	63280169	1000	-	.	gene_id "MSTRG.1772"; transcript_id "Zm00001d029234_T001"; gene_name "Zm00001d029234"; ref_gene_id "Zm00001d029234";
1	StringTie	exon	63277853	63277939	1000	-	.	gene_id "MSTRG.1772"; transcript_id "Zm00001d029234_T001"; exon_number "1"; gene_name "Zm00001d029234"; ref_gene_id "Zm00001d029234";
1	StringTie	exon	63278019	63278112	1000	-	.	gene_id "MSTRG.1772"; transcript_id "Zm00001d029234_T001"; exon_number "2"; gene_name "Zm00001d029234"; ref_gene_id "Zm00001d029234";
1	StringTie	exon	63278653	63278768	1000	-	.	gene_id "MSTRG.1772"; transcript_id "Zm00001d029234_T001"; exon_number "3"; gene_name "Zm00001d029234"; ref_gene_id "Zm00001d029234";
1	StringTie	exon	63279247	63279420	1000	-	.	gene_id "MSTRG.1772"; transcript_id "Zm00001d029234_T001"; exon_number "4"; gene_name "Zm00001d029234"; ref_gene_id "Zm00001d029234";
1	StringTie	exon	63279913	63280169	1000	-	.	gene_id "MSTRG.1772"; transcript_id "Zm00001d029234_T001"; exon_number "5"; gene_name "Zm00001d029234"; ref_gene_id "Zm00001d029234";
1	StringTie	transcript	63279247	63280169	1000	-	.	gene_id "MSTRG.1772"; transcript_id "Zm00001d029234_T011"; gene_name "Zm00001d029234"; ref_gene_id "Zm00001d029234";
1	StringTie	exon	63279247	63279420	1000	-	.	gene_id "MSTRG.1772"; transcript_id "Zm00001d029234_T011"; exon_number "1"; gene_name "Zm00001d029234"; ref_gene_id "Zm00001d029234";
1	StringTie	exon	63279913	63280169	1000	-	.	gene_id "MSTRG.1772"; transcript_id "Zm00001d029234_T011"; exon_number "2"; gene_name "Zm00001d029234"; ref_gene_id "Zm00001d029234";
1	StringTie	transcript	64043126	64045687	1000	-	.	gene_id "MSTRG.1795"; transcript_id "Zm00001d029263_T001"; gene_name "Zm00001d029263"; ref_gene_id "Zm00001d029263";
1	StringTie	exon	64043126	64043174	1000	-	.	gene_id "MSTRG.1795"; transcript_id "Zm00001d029263_T001"; exon_number "1"; gene_name "Zm00001d029263"; ref_gene_id "Zm00001d029263";
1	StringTie	exon	64044584	64044723	1000	-	.	gene_id "MSTRG.1795"; transcript_id "Zm00001d029263_T001"; exon_number "2"; gene_name "Zm00001d029263"; ref_gene_id "Zm00001d029263";
1	StringTie	exon	64045461	64045687	1000	-	.	gene_id "MSTRG.1795"; transcript_id "Zm00001d029263_T001"; exon_number "3"; gene_name "Zm00001d029263"; ref_gene_id "Zm00001d029263";
1	StringTie	transcript	64211903	64213049	1000	+	.	gene_id "MSTRG.1796"; transcript_id "Zm00001d029264_T019"; gene_name "Zm00001d029264"; ref_gene_id "Zm00001d029264";
1	StringTie	exon	64211903	64213049	1000	+	.	gene_id "MSTRG.1796"; transcript_id "Zm00001d029264_T019"; exon_number "1"; gene_name "Zm00001d029264"; ref_gene_id "Zm00001d029264";
1	StringTie	transcript	64354844	64355283	1000	+	.	gene_id "MSTRG.1798"; transcript_id "Zm00001d029266_T001"; gene_name "Zm00001d029266"; ref_gene_id "Zm00001d029266";
1	StringTie	exon	64354844	64354985	1000	+	.	gene_id "MSTRG.1798"; transcript_id "Zm00001d029266_T001"; exon_number "1"; gene_name "Zm00001d029266"; ref_gene_id "Zm00001d029266";
1	StringTie	exon	64355181	64355283	1000	+	.	gene_id "MSTRG.1798"; transcript_id "Zm00001d029266_T001"; exon_number "2"; gene_name "Zm00001d029266"; ref_gene_id "Zm00001d029266";
1	StringTie	transcript	64438551	64440303	1000	+	.	gene_id "MSTRG.1803"; transcript_id "Zm00001d029272_T007"; gene_name "Zm00001d029272"; ref_gene_id "Zm00001d029272";
1	StringTie	exon	64438551	64438636	1000	+	.	gene_id "MSTRG.1803"; transcript_id "Zm00001d029272_T007"; exon_number "1"; gene_name "Zm00001d029272"; ref_gene_id "Zm00001d029272";
1	StringTie	exon	64438789	64438874	1000	+	.	gene_id "MSTRG.1803"; transcript_id "Zm00001d029272_T007"; exon_number "2"; gene_name "Zm00001d029272"; ref_gene_id "Zm00001d029272";
1	StringTie	exon	64439701	64439770	1000	+	.	gene_id "MSTRG.1803"; transcript_id "Zm00001d029272_T007"; exon_number "3"; gene_name "Zm00001d029272"; ref_gene_id "Zm00001d029272";
1	StringTie	exon	64440206	64440303	1000	+	.	gene_id "MSTRG.1803"; transcript_id "Zm00001d029272_T007"; exon_number "4"; gene_name "Zm00001d029272"; ref_gene_id "Zm00001d029272";
1	StringTie	transcript	64728979	64729485	1000	-	.	gene_id "MSTRG.1808"; transcript_id "Zm00001d029281_T004"; gene_name "Zm00001d029281"; ref_gene_id "Zm00001d029281";
1	StringTie	exon	64728979	64729095	1000	-	.	gene_id "MSTRG.1808"; transcript_id "Zm00001d029281_T004"; exon_number "1"; gene_name "Zm00001d029281"; ref_gene_id "Zm00001d029281";
1	StringTie	exon	64729242	64729316	1000	-	.	gene_id "MSTRG.1808"; transcript_id "Zm00001d029281_T004"; exon_number "2"; gene_name "Zm00001d029281"; ref_gene_id "Zm00001d029281";
1	StringTie	exon	64729402	64729485	1000	-	.	gene_id "MSTRG.1808"; transcript_id "Zm00001d029281_T004"; exon_number "3"; gene_name "Zm00001d029281"; ref_gene_id "Zm00001d029281";
1	StringTie	transcript	64728979	64729965	1000	-	.	gene_id "MSTRG.1808"; transcript_id "Zm00001d029281_T005"; gene_name "Zm00001d029281"; ref_gene_id "Zm00001d029281";
1	StringTie	exon	64728979	64729095	1000	-	.	gene_id "MSTRG.1808"; transcript_id "Zm00001d029281_T005"; exon_number "1"; gene_name "Zm00001d029281"; ref_gene_id "Zm00001d029281";
1	StringTie	exon	64729242	64729485	1000	-	.	gene_id "MSTRG.1808"; transcript_id "Zm00001d029281_T005"; exon_number "2"; gene_name "Zm00001d029281"; ref_gene_id "Zm00001d029281";
1	StringTie	exon	64729820	64729965	1000	-	.	gene_id "MSTRG.1808"; transcript_id "Zm00001d029281_T005"; exon_number "3"; gene_name "Zm00001d029281"; ref_gene_id "Zm00001d029281";
1	StringTie	transcript	64844844	64846984	1000	+	.	gene_id "MSTRG.1810"; transcript_id "Zm00001d029285_T001"; gene_name "pyruvate dehydrogenase (lipoamide) kinase1"; ref_gene_id "Zm00001d029285";
1	StringTie	exon	64844844	64844972	1000	+	.	gene_id "MSTRG.1810"; transcript_id "Zm00001d029285_T001"; exon_number "1"; gene_name "pyruvate dehydrogenase (lipoamide) kinase1"; ref_gene_id "Zm00001d029285";
1	StringTie	exon	64846100	64846190	1000	+	.	gene_id "MSTRG.1810"; transcript_id "Zm00001d029285_T001"; exon_number "2"; gene_name "pyruvate dehydrogenase (lipoamide) kinase1"; ref_gene_id "Zm00001d029285";
1	StringTie	exon	64846567	64846984	1000	+	.	gene_id "MSTRG.1810"; transcript_id "Zm00001d029285_T001"; exon_number "3"; gene_name "pyruvate dehydrogenase (lipoamide) kinase1"; ref_gene_id "Zm00001d029285";
1	StringTie	transcript	64846100	64846984	1000	+	.	gene_id "MSTRG.1810"; transcript_id "Zm00001d029285_T007"; gene_name "pyruvate dehydrogenase (lipoamide) kinase1"; ref_gene_id "Zm00001d029285";
1	StringTie	exon	64846100	64846190	1000	+	.	gene_id "MSTRG.1810"; transcript_id "Zm00001d029285_T007"; exon_number "1"; gene_name "pyruvate dehydrogenase (lipoamide) kinase1"; ref_gene_id "Zm00001d029285";
1	StringTie	exon	64846567	64846984	1000	+	.	gene_id "MSTRG.1810"; transcript_id "Zm00001d029285_T007"; exon_number "2"; gene_name "pyruvate dehydrogenase (lipoamide) kinase1"; ref_gene_id "Zm00001d029285";
1	StringTie	transcript	65943313	65945017	1000	-	.	gene_id "MSTRG.1840"; transcript_id "Zm00001d029324_T011"; gene_name "Zm00001d029324"; ref_gene_id "Zm00001d029324";
1	StringTie	exon	65943313	65943396	1000	-	.	gene_id "MSTRG.1840"; transcript_id "Zm00001d029324_T011"; exon_number "1"; gene_name "Zm00001d029324"; ref_gene_id "Zm00001d029324";
1	StringTie	exon	65944616	65944652	1000	-	.	gene_id "MSTRG.1840"; transcript_id "Zm00001d029324_T011"; exon_number "2"; gene_name "Zm00001d029324"; ref_gene_id "Zm00001d029324";
1	StringTie	exon	65944724	65945017	1000	-	.	gene_id "MSTRG.1840"; transcript_id "Zm00001d029324_T011"; exon_number "3"; gene_name "Zm00001d029324"; ref_gene_id "Zm00001d029324";
1	StringTie	transcript	65944616	65945017	1000	-	.	gene_id "MSTRG.1840"; transcript_id "Zm00001d029324_T005"; gene_name "Zm00001d029324"; ref_gene_id "Zm00001d029324";
1	StringTie	exon	65944616	65944640	1000	-	.	gene_id "MSTRG.1840"; transcript_id "Zm00001d029324_T005"; exon_number "1"; gene_name "Zm00001d029324"; ref_gene_id "Zm00001d029324";
1	StringTie	exon	65944715	65945017	1000	-	.	gene_id "MSTRG.1840"; transcript_id "Zm00001d029324_T005"; exon_number "2"; gene_name "Zm00001d029324"; ref_gene_id "Zm00001d029324";
1	StringTie	transcript	66246590	66247363	1000	+	.	gene_id "MSTRG.1843"; transcript_id "Zm00001d029329_T013"; gene_name "Zm00001d029329"; ref_gene_id "Zm00001d029329";
1	StringTie	exon	66246590	66246607	1000	+	.	gene_id "MSTRG.1843"; transcript_id "Zm00001d029329_T013"; exon_number "1"; gene_name "Zm00001d029329"; ref_gene_id "Zm00001d029329";
1	StringTie	exon	66246713	66246817	1000	+	.	gene_id "MSTRG.1843"; transcript_id "Zm00001d029329_T013"; exon_number "2"; gene_name "Zm00001d029329"; ref_gene_id "Zm00001d029329";
1	StringTie	exon	66246909	66247363	1000	+	.	gene_id "MSTRG.1843"; transcript_id "Zm00001d029329_T013"; exon_number "3"; gene_name "Zm00001d029329"; ref_gene_id "Zm00001d029329";
1	StringTie	transcript	66246782	66247665	1000	+	.	gene_id "MSTRG.1843"; transcript_id "Zm00001d029329_T015"; gene_name "Zm00001d029329"; ref_gene_id "Zm00001d029329";
1	StringTie	exon	66246782	66246817	1000	+	.	gene_id "MSTRG.1843"; transcript_id "Zm00001d029329_T015"; exon_number "1"; gene_name "Zm00001d029329"; ref_gene_id "Zm00001d029329";
1	StringTie	exon	66246909	66246990	1000	+	.	gene_id "MSTRG.1843"; transcript_id "Zm00001d029329_T015"; exon_number "2"; gene_name "Zm00001d029329"; ref_gene_id "Zm00001d029329";
1	StringTie	exon	66247364	66247665	1000	+	.	gene_id "MSTRG.1843"; transcript_id "Zm00001d029329_T015"; exon_number "3"; gene_name "Zm00001d029329"; ref_gene_id "Zm00001d029329";
1	StringTie	transcript	66592633	66593487	1000	+	.	gene_id "MSTRG.1854"; transcript_id "Zm00001d029340_T001"; gene_name "Zm00001d029340"; ref_gene_id "Zm00001d029340";
1	StringTie	exon	66592633	66592660	1000	+	.	gene_id "MSTRG.1854"; transcript_id "Zm00001d029340_T001"; exon_number "1"; gene_name "Zm00001d029340"; ref_gene_id "Zm00001d029340";
1	StringTie	exon	66593193	66593487	1000	+	.	gene_id "MSTRG.1854"; transcript_id "Zm00001d029340_T001"; exon_number "2"; gene_name "Zm00001d029340"; ref_gene_id "Zm00001d029340";
1	StringTie	transcript	66644657	66645384	1000	+	.	gene_id "MSTRG.1856"; transcript_id "Zm00001d029342_T007"; gene_name "Zm00001d029342"; ref_gene_id "Zm00001d029342";
1	StringTie	exon	66644657	66644658	1000	+	.	gene_id "MSTRG.1856"; transcript_id "Zm00001d029342_T007"; exon_number "1"; gene_name "Zm00001d029342"; ref_gene_id "Zm00001d029342";
1	StringTie	exon	66644801	66645384	1000	+	.	gene_id "MSTRG.1856"; transcript_id "Zm00001d029342_T007"; exon_number "2"; gene_name "Zm00001d029342"; ref_gene_id "Zm00001d029342";
1	StringTie	transcript	67039060	67039530	1000	-	.	gene_id "MSTRG.1863"; transcript_id "Zm00001d029352_T004"; gene_name "Zm00001d029352"; ref_gene_id "Zm00001d029352";
1	StringTie	exon	67039060	67039530	1000	-	.	gene_id "MSTRG.1863"; transcript_id "Zm00001d029352_T004"; exon_number "1"; gene_name "Zm00001d029352"; ref_gene_id "Zm00001d029352";
1	StringTie	transcript	67109158	67109460	1000	-	.	gene_id "MSTRG.1864"; transcript_id "Zm00001d029353_T001"; gene_name "benzoxazinone synthesis12"; ref_gene_id "Zm00001d029353";
1	StringTie	exon	67109158	67109460	1000	-	.	gene_id "MSTRG.1864"; transcript_id "Zm00001d029353_T001"; exon_number "1"; gene_name "benzoxazinone synthesis12"; ref_gene_id "Zm00001d029353";
1	StringTie	transcript	67229232	67229534	1000	-	.	gene_id "MSTRG.1866"; transcript_id "Zm00001d029356_T005"; gene_name "benzoxazinone synthesis11"; ref_gene_id "Zm00001d029356";
1	StringTie	exon	67229232	67229534	1000	-	.	gene_id "MSTRG.1866"; transcript_id "Zm00001d029356_T005"; exon_number "1"; gene_name "benzoxazinone synthesis11"; ref_gene_id "Zm00001d029356";
1	StringTie	transcript	67312256	67312558	1000	-	.	gene_id "MSTRG.1869"; transcript_id "Zm00001d029359_T002"; gene_name "benzoxazinone synthesis10"; ref_gene_id "Zm00001d029359";
1	StringTie	exon	67312256	67312558	1000	-	.	gene_id "MSTRG.1869"; transcript_id "Zm00001d029359_T002"; exon_number "1"; gene_name "benzoxazinone synthesis10"; ref_gene_id "Zm00001d029359";
1	StringTie	transcript	67436271	67442049	1000	-	.	gene_id "MSTRG.1872"; transcript_id "Zm00001d029361_T001"; gene_name "Zm00001d029361"; ref_gene_id "Zm00001d029361";
1	StringTie	exon	67436271	67436405	1000	-	.	gene_id "MSTRG.1872"; transcript_id "Zm00001d029361_T001"; exon_number "1"; gene_name "Zm00001d029361"; ref_gene_id "Zm00001d029361";
1	StringTie	exon	67441911	67442049	1000	-	.	gene_id "MSTRG.1872"; transcript_id "Zm00001d029361_T001"; exon_number "2"; gene_name "Zm00001d029361"; ref_gene_id "Zm00001d029361";
1	StringTie	transcript	67597844	67598412	1000	+	.	gene_id "MSTRG.1874"; transcript_id "Zm00001d029365_T001"; gene_name "Zm00001d029365"; ref_gene_id "Zm00001d029365";
1	StringTie	exon	67597844	67598412	1000	+	.	gene_id "MSTRG.1874"; transcript_id "Zm00001d029365_T001"; exon_number "1"; gene_name "Zm00001d029365"; ref_gene_id "Zm00001d029365";
1	StringTie	transcript	68248702	68249071	1000	+	.	gene_id "MSTRG.1885"; transcript_id "Zm00001d029378_T014"; gene_name "Zm00001d029378"; ref_gene_id "Zm00001d029378";
1	StringTie	exon	68248702	68249071	1000	+	.	gene_id "MSTRG.1885"; transcript_id "Zm00001d029378_T014"; exon_number "1"; gene_name "Zm00001d029378"; ref_gene_id "Zm00001d029378";
1	StringTie	transcript	68249181	68250776	1000	+	.	gene_id "MSTRG.1885"; transcript_id "Zm00001d029378_T009"; gene_name "Zm00001d029378"; ref_gene_id "Zm00001d029378";
1	StringTie	exon	68249181	68249327	1000	+	.	gene_id "MSTRG.1885"; transcript_id "Zm00001d029378_T009"; exon_number "1"; gene_name "Zm00001d029378"; ref_gene_id "Zm00001d029378";
1	StringTie	exon	68250011	68250163	1000	+	.	gene_id "MSTRG.1885"; transcript_id "Zm00001d029378_T009"; exon_number "2"; gene_name "Zm00001d029378"; ref_gene_id "Zm00001d029378";
1	StringTie	exon	68250235	68250776	1000	+	.	gene_id "MSTRG.1885"; transcript_id "Zm00001d029378_T009"; exon_number "3"; gene_name "Zm00001d029378"; ref_gene_id "Zm00001d029378";
1	StringTie	transcript	68249181	68250776	1000	+	.	gene_id "MSTRG.1885"; transcript_id "Zm00001d029378_T011"; gene_name "Zm00001d029378"; ref_gene_id "Zm00001d029378";
1	StringTie	exon	68249181	68249327	1000	+	.	gene_id "MSTRG.1885"; transcript_id "Zm00001d029378_T011"; exon_number "1"; gene_name "Zm00001d029378"; ref_gene_id "Zm00001d029378";
1	StringTie	exon	68250011	68250163	1000	+	.	gene_id "MSTRG.1885"; transcript_id "Zm00001d029378_T011"; exon_number "2"; gene_name "Zm00001d029378"; ref_gene_id "Zm00001d029378";
1	StringTie	exon	68250241	68250776	1000	+	.	gene_id "MSTRG.1885"; transcript_id "Zm00001d029378_T011"; exon_number "3"; gene_name "Zm00001d029378"; ref_gene_id "Zm00001d029378";
1	StringTie	transcript	68250011	68250776	1000	+	.	gene_id "MSTRG.1885"; transcript_id "Zm00001d029378_T007"; gene_name "Zm00001d029378"; ref_gene_id "Zm00001d029378";
1	StringTie	exon	68250011	68250163	1000	+	.	gene_id "MSTRG.1885"; transcript_id "Zm00001d029378_T007"; exon_number "1"; gene_name "Zm00001d029378"; ref_gene_id "Zm00001d029378";
1	StringTie	exon	68250241	68250776	1000	+	.	gene_id "MSTRG.1885"; transcript_id "Zm00001d029378_T007"; exon_number "2"; gene_name "Zm00001d029378"; ref_gene_id "Zm00001d029378";
1	StringTie	transcript	68549526	68549879	1000	-	.	gene_id "MSTRG.1891"; transcript_id "Zm00001d029387_T003"; gene_name "Zm00001d029387"; ref_gene_id "Zm00001d029387";
1	StringTie	exon	68549526	68549585	1000	-	.	gene_id "MSTRG.1891"; transcript_id "Zm00001d029387_T003"; exon_number "1"; gene_name "Zm00001d029387"; ref_gene_id "Zm00001d029387";
1	StringTie	exon	68549691	68549879	1000	-	.	gene_id "MSTRG.1891"; transcript_id "Zm00001d029387_T003"; exon_number "2"; gene_name "Zm00001d029387"; ref_gene_id "Zm00001d029387";
1	StringTie	transcript	68566451	68566824	1000	-	.	gene_id "MSTRG.1892"; transcript_id "Zm00001d029388_T002"; gene_name "Zm00001d029388"; ref_gene_id "Zm00001d029388";
1	StringTie	exon	68566451	68566510	1000	-	.	gene_id "MSTRG.1892"; transcript_id "Zm00001d029388_T002"; exon_number "1"; gene_name "Zm00001d029388"; ref_gene_id "Zm00001d029388";
1	StringTie	exon	68566624	68566824	1000	-	.	gene_id "MSTRG.1892"; transcript_id "Zm00001d029388_T002"; exon_number "2"; gene_name "Zm00001d029388"; ref_gene_id "Zm00001d029388";
1	StringTie	transcript	68566573	68566824	1000	-	.	gene_id "MSTRG.1892"; transcript_id "Zm00001d029388_T003"; gene_name "Zm00001d029388"; ref_gene_id "Zm00001d029388";
1	StringTie	exon	68566573	68566824	1000	-	.	gene_id "MSTRG.1892"; transcript_id "Zm00001d029388_T003"; exon_number "1"; gene_name "Zm00001d029388"; ref_gene_id "Zm00001d029388";
1	StringTie	transcript	68666344	68666752	1000	+	.	gene_id "MSTRG.1895"; transcript_id "Zm00001d029391_T003"; gene_name "Zm00001d029391"; ref_gene_id "Zm00001d029391";
1	StringTie	exon	68666344	68666752	1000	+	.	gene_id "MSTRG.1895"; transcript_id "Zm00001d029391_T003"; exon_number "1"; gene_name "Zm00001d029391"; ref_gene_id "Zm00001d029391";
1	StringTie	transcript	68807380	68808399	1000	+	.	gene_id "MSTRG.1898"; transcript_id "Zm00001d029394_T001"; gene_name "uaz248a(his3)"; ref_gene_id "Zm00001d029394";
1	StringTie	exon	68807380	68807451	1000	+	.	gene_id "MSTRG.1898"; transcript_id "Zm00001d029394_T001"; exon_number "1"; gene_name "uaz248a(his3)"; ref_gene_id "Zm00001d029394";
1	StringTie	exon	68807565	68807645	1000	+	.	gene_id "MSTRG.1898"; transcript_id "Zm00001d029394_T001"; exon_number "2"; gene_name "uaz248a(his3)"; ref_gene_id "Zm00001d029394";
1	StringTie	exon	68808011	68808399	1000	+	.	gene_id "MSTRG.1898"; transcript_id "Zm00001d029394_T001"; exon_number "3"; gene_name "uaz248a(his3)"; ref_gene_id "Zm00001d029394";
1	StringTie	transcript	69732709	69734824	1000	-	.	gene_id "MSTRG.1920"; transcript_id "Zm00001d029418_T002"; gene_name "Zm00001d029418"; ref_gene_id "Zm00001d029418";
1	StringTie	exon	69732709	69732752	1000	-	.	gene_id "MSTRG.1920"; transcript_id "Zm00001d029418_T002"; exon_number "1"; gene_name "Zm00001d029418"; ref_gene_id "Zm00001d029418";
1	StringTie	exon	69732862	69732963	1000	-	.	gene_id "MSTRG.1920"; transcript_id "Zm00001d029418_T002"; exon_number "2"; gene_name "Zm00001d029418"; ref_gene_id "Zm00001d029418";
1	StringTie	exon	69734535	69734670	1000	-	.	gene_id "MSTRG.1920"; transcript_id "Zm00001d029418_T002"; exon_number "3"; gene_name "Zm00001d029418"; ref_gene_id "Zm00001d029418";
1	StringTie	exon	69734751	69734824	1000	-	.	gene_id "MSTRG.1920"; transcript_id "Zm00001d029418_T002"; exon_number "4"; gene_name "Zm00001d029418"; ref_gene_id "Zm00001d029418";
1	StringTie	transcript	69732709	69732913	1000	-	.	gene_id "MSTRG.1920"; transcript_id "Zm00001d029418_T004"; gene_name "Zm00001d029418"; ref_gene_id "Zm00001d029418";
1	StringTie	exon	69732709	69732752	1000	-	.	gene_id "MSTRG.1920"; transcript_id "Zm00001d029418_T004"; exon_number "1"; gene_name "Zm00001d029418"; ref_gene_id "Zm00001d029418";
1	StringTie	exon	69732862	69732913	1000	-	.	gene_id "MSTRG.1920"; transcript_id "Zm00001d029418_T004"; exon_number "2"; gene_name "Zm00001d029418"; ref_gene_id "Zm00001d029418";
1	StringTie	transcript	69732709	69734824	1000	-	.	gene_id "MSTRG.1920"; transcript_id "Zm00001d029418_T003"; gene_name "Zm00001d029418"; ref_gene_id "Zm00001d029418";
1	StringTie	exon	69732709	69732752	1000	-	.	gene_id "MSTRG.1920"; transcript_id "Zm00001d029418_T003"; exon_number "1"; gene_name "Zm00001d029418"; ref_gene_id "Zm00001d029418";
1	StringTie	exon	69732862	69732913	1000	-	.	gene_id "MSTRG.1920"; transcript_id "Zm00001d029418_T003"; exon_number "2"; gene_name "Zm00001d029418"; ref_gene_id "Zm00001d029418";
1	StringTie	exon	69734407	69734670	1000	-	.	gene_id "MSTRG.1920"; transcript_id "Zm00001d029418_T003"; exon_number "3"; gene_name "Zm00001d029418"; ref_gene_id "Zm00001d029418";
1	StringTie	exon	69734751	69734824	1000	-	.	gene_id "MSTRG.1920"; transcript_id "Zm00001d029418_T003"; exon_number "4"; gene_name "Zm00001d029418"; ref_gene_id "Zm00001d029418";
1	StringTie	transcript	69732709	69734824	1000	-	.	gene_id "MSTRG.1920"; transcript_id "Zm00001d029418_T005"; gene_name "Zm00001d029418"; ref_gene_id "Zm00001d029418";
1	StringTie	exon	69732709	69732752	1000	-	.	gene_id "MSTRG.1920"; transcript_id "Zm00001d029418_T005"; exon_number "1"; gene_name "Zm00001d029418"; ref_gene_id "Zm00001d029418";
1	StringTie	exon	69732862	69732913	1000	-	.	gene_id "MSTRG.1920"; transcript_id "Zm00001d029418_T005"; exon_number "2"; gene_name "Zm00001d029418"; ref_gene_id "Zm00001d029418";
1	StringTie	exon	69732960	69732963	1000	-	.	gene_id "MSTRG.1920"; transcript_id "Zm00001d029418_T005"; exon_number "3"; gene_name "Zm00001d029418"; ref_gene_id "Zm00001d029418";
1	StringTie	exon	69734537	69734670	1000	-	.	gene_id "MSTRG.1920"; transcript_id "Zm00001d029418_T005"; exon_number "4"; gene_name "Zm00001d029418"; ref_gene_id "Zm00001d029418";
1	StringTie	exon	69734751	69734824	1000	-	.	gene_id "MSTRG.1920"; transcript_id "Zm00001d029418_T005"; exon_number "5"; gene_name "Zm00001d029418"; ref_gene_id "Zm00001d029418";
1	StringTie	transcript	70063825	70069406	1000	+	.	gene_id "MSTRG.1926"; transcript_id "Zm00001d029426_T007"; gene_name "Zm00001d029426"; ref_gene_id "Zm00001d029426";
1	StringTie	exon	70063825	70063850	1000	+	.	gene_id "MSTRG.1926"; transcript_id "Zm00001d029426_T007"; exon_number "1"; gene_name "Zm00001d029426"; ref_gene_id "Zm00001d029426";
1	StringTie	exon	70063922	70063960	1000	+	.	gene_id "MSTRG.1926"; transcript_id "Zm00001d029426_T007"; exon_number "2"; gene_name "Zm00001d029426"; ref_gene_id "Zm00001d029426";
1	StringTie	exon	70064040	70064232	1000	+	.	gene_id "MSTRG.1926"; transcript_id "Zm00001d029426_T007"; exon_number "3"; gene_name "Zm00001d029426"; ref_gene_id "Zm00001d029426";
1	StringTie	exon	70068074	70068098	1000	+	.	gene_id "MSTRG.1926"; transcript_id "Zm00001d029426_T007"; exon_number "4"; gene_name "Zm00001d029426"; ref_gene_id "Zm00001d029426";
1	StringTie	exon	70068197	70068326	1000	+	.	gene_id "MSTRG.1926"; transcript_id "Zm00001d029426_T007"; exon_number "5"; gene_name "Zm00001d029426"; ref_gene_id "Zm00001d029426";
1	StringTie	exon	70068902	70069000	1000	+	.	gene_id "MSTRG.1926"; transcript_id "Zm00001d029426_T007"; exon_number "6"; gene_name "Zm00001d029426"; ref_gene_id "Zm00001d029426";
1	StringTie	exon	70069091	70069406	1000	+	.	gene_id "MSTRG.1926"; transcript_id "Zm00001d029426_T007"; exon_number "7"; gene_name "Zm00001d029426"; ref_gene_id "Zm00001d029426";
1	StringTie	transcript	70068074	70069000	1000	+	.	gene_id "MSTRG.1926"; transcript_id "Zm00001d029426_T019"; gene_name "Zm00001d029426"; ref_gene_id "Zm00001d029426";
1	StringTie	exon	70068074	70068098	1000	+	.	gene_id "MSTRG.1926"; transcript_id "Zm00001d029426_T019"; exon_number "1"; gene_name "Zm00001d029426"; ref_gene_id "Zm00001d029426";
1	StringTie	exon	70068197	70068321	1000	+	.	gene_id "MSTRG.1926"; transcript_id "Zm00001d029426_T019"; exon_number "2"; gene_name "Zm00001d029426"; ref_gene_id "Zm00001d029426";
1	StringTie	exon	70068902	70069000	1000	+	.	gene_id "MSTRG.1926"; transcript_id "Zm00001d029426_T019"; exon_number "3"; gene_name "Zm00001d029426"; ref_gene_id "Zm00001d029426";
1	StringTie	transcript	70068074	70069406	1000	+	.	gene_id "MSTRG.1926"; transcript_id "Zm00001d029426_T014"; gene_name "Zm00001d029426"; ref_gene_id "Zm00001d029426";
1	StringTie	exon	70068074	70068098	1000	+	.	gene_id "MSTRG.1926"; transcript_id "Zm00001d029426_T014"; exon_number "1"; gene_name "Zm00001d029426"; ref_gene_id "Zm00001d029426";
1	StringTie	exon	70068197	70068326	1000	+	.	gene_id "MSTRG.1926"; transcript_id "Zm00001d029426_T014"; exon_number "2"; gene_name "Zm00001d029426"; ref_gene_id "Zm00001d029426";
1	StringTie	exon	70068902	70069000	1000	+	.	gene_id "MSTRG.1926"; transcript_id "Zm00001d029426_T014"; exon_number "3"; gene_name "Zm00001d029426"; ref_gene_id "Zm00001d029426";
1	StringTie	exon	70069091	70069406	1000	+	.	gene_id "MSTRG.1926"; transcript_id "Zm00001d029426_T014"; exon_number "4"; gene_name "Zm00001d029426"; ref_gene_id "Zm00001d029426";
1	StringTie	transcript	70817970	70819233	1000	-	.	gene_id "MSTRG.1938"; transcript_id "Zm00001d029443_T016"; gene_name "Zm00001d029443"; ref_gene_id "Zm00001d029443";
1	StringTie	exon	70817970	70818220	1000	-	.	gene_id "MSTRG.1938"; transcript_id "Zm00001d029443_T016"; exon_number "1"; gene_name "Zm00001d029443"; ref_gene_id "Zm00001d029443";
1	StringTie	exon	70819153	70819233	1000	-	.	gene_id "MSTRG.1938"; transcript_id "Zm00001d029443_T016"; exon_number "2"; gene_name "Zm00001d029443"; ref_gene_id "Zm00001d029443";
1	StringTie	transcript	70829510	70829724	1000	-	.	gene_id "MSTRG.1938"; transcript_id "Zm00001d029443_T010"; gene_name "Zm00001d029443"; ref_gene_id "Zm00001d029443";
1	StringTie	exon	70829510	70829724	1000	-	.	gene_id "MSTRG.1938"; transcript_id "Zm00001d029443_T010"; exon_number "1"; gene_name "Zm00001d029443"; ref_gene_id "Zm00001d029443";
1	StringTie	transcript	70865328	70865549	1000	-	.	gene_id "MSTRG.1939"; transcript_id "Zm00001d029444_T001"; gene_name "Zm00001d029444"; ref_gene_id "Zm00001d029444";
1	StringTie	exon	70865328	70865549	1000	-	.	gene_id "MSTRG.1939"; transcript_id "Zm00001d029444_T001"; exon_number "1"; gene_name "Zm00001d029444"; ref_gene_id "Zm00001d029444";
1	StringTie	transcript	71310995	71312223	1000	+	.	gene_id "MSTRG.1944"; transcript_id "Zm00001d022758_T001"; gene_name "Zm00001d022758"; ref_gene_id "Zm00001d022758";
1	StringTie	exon	71310995	71312223	1000	+	.	gene_id "MSTRG.1944"; transcript_id "Zm00001d022758_T001"; exon_number "1"; gene_name "Zm00001d022758"; ref_gene_id "Zm00001d022758";
1	StringTie	transcript	71428923	71429674	1000	+	.	gene_id "MSTRG.1947"; transcript_id "Zm00001d029454_T011"; gene_name "Zm00001d029454"; ref_gene_id "Zm00001d029454";
1	StringTie	exon	71428923	71429163	1000	+	.	gene_id "MSTRG.1947"; transcript_id "Zm00001d029454_T011"; exon_number "1"; gene_name "Zm00001d029454"; ref_gene_id "Zm00001d029454";
1	StringTie	exon	71429532	71429674	1000	+	.	gene_id "MSTRG.1947"; transcript_id "Zm00001d029454_T011"; exon_number "2"; gene_name "Zm00001d029454"; ref_gene_id "Zm00001d029454";
1	StringTie	transcript	71836447	71836530	1000	-	.	gene_id "MSTRG.1954"; transcript_id "Zm00001d029462_T001"; gene_name "Zm00001d029462"; ref_gene_id "Zm00001d029462";
1	StringTie	exon	71836447	71836530	1000	-	.	gene_id "MSTRG.1954"; transcript_id "Zm00001d029462_T001"; exon_number "1"; gene_name "Zm00001d029462"; ref_gene_id "Zm00001d029462";
1	StringTie	transcript	72601613	72602773	1000	-	.	gene_id "MSTRG.1969"; transcript_id "Zm00001d029482_T003"; gene_name "Zm00001d029482"; ref_gene_id "Zm00001d029482";
1	StringTie	exon	72601613	72601707	1000	-	.	gene_id "MSTRG.1969"; transcript_id "Zm00001d029482_T003"; exon_number "1"; gene_name "Zm00001d029482"; ref_gene_id "Zm00001d029482";
1	StringTie	exon	72602504	72602773	1000	-	.	gene_id "MSTRG.1969"; transcript_id "Zm00001d029482_T003"; exon_number "2"; gene_name "Zm00001d029482"; ref_gene_id "Zm00001d029482";
1	StringTie	transcript	72603169	72605955	1000	+	.	gene_id "MSTRG.1970"; transcript_id "Zm00001d029483_T001"; gene_name "Zm00001d029483"; ref_gene_id "Zm00001d029483";
1	StringTie	exon	72603169	72603203	1000	+	.	gene_id "MSTRG.1970"; transcript_id "Zm00001d029483_T001"; exon_number "1"; gene_name "Zm00001d029483"; ref_gene_id "Zm00001d029483";
1	StringTie	exon	72603304	72603326	1000	+	.	gene_id "MSTRG.1970"; transcript_id "Zm00001d029483_T001"; exon_number "2"; gene_name "Zm00001d029483"; ref_gene_id "Zm00001d029483";
1	StringTie	exon	72605492	72605613	1000	+	.	gene_id "MSTRG.1970"; transcript_id "Zm00001d029483_T001"; exon_number "3"; gene_name "Zm00001d029483"; ref_gene_id "Zm00001d029483";
1	StringTie	exon	72605687	72605955	1000	+	.	gene_id "MSTRG.1970"; transcript_id "Zm00001d029483_T001"; exon_number "4"; gene_name "Zm00001d029483"; ref_gene_id "Zm00001d029483";
1	StringTie	transcript	73080404	73081606	1000	-	.	gene_id "MSTRG.1978"; transcript_id "Zm00001d029495_T001"; gene_name "Zm00001d029495"; ref_gene_id "Zm00001d029495";
1	StringTie	exon	73080404	73080685	1000	-	.	gene_id "MSTRG.1978"; transcript_id "Zm00001d029495_T001"; exon_number "1"; gene_name "Zm00001d029495"; ref_gene_id "Zm00001d029495";
1	StringTie	exon	73081583	73081606	1000	-	.	gene_id "MSTRG.1978"; transcript_id "Zm00001d029495_T001"; exon_number "2"; gene_name "Zm00001d029495"; ref_gene_id "Zm00001d029495";
1	StringTie	transcript	74160538	74164160	1000	-	.	gene_id "MSTRG.1994"; transcript_id "Zm00001d029516_T004"; gene_name "Zm00001d029516"; ref_gene_id "Zm00001d029516";
1	StringTie	exon	74160538	74160542	1000	-	.	gene_id "MSTRG.1994"; transcript_id "Zm00001d029516_T004"; exon_number "1"; gene_name "Zm00001d029516"; ref_gene_id "Zm00001d029516";
1	StringTie	exon	74163608	74164160	1000	-	.	gene_id "MSTRG.1994"; transcript_id "Zm00001d029516_T004"; exon_number "2"; gene_name "Zm00001d029516"; ref_gene_id "Zm00001d029516";
1	StringTie	transcript	74163298	74164160	1000	-	.	gene_id "MSTRG.1994"; transcript_id "Zm00001d029516_T003"; gene_name "Zm00001d029516"; ref_gene_id "Zm00001d029516";
1	StringTie	exon	74163298	74163348	1000	-	.	gene_id "MSTRG.1994"; transcript_id "Zm00001d029516_T003"; exon_number "1"; gene_name "Zm00001d029516"; ref_gene_id "Zm00001d029516";
1	StringTie	exon	74163612	74164160	1000	-	.	gene_id "MSTRG.1994"; transcript_id "Zm00001d029516_T003"; exon_number "2"; gene_name "Zm00001d029516"; ref_gene_id "Zm00001d029516";
1	StringTie	transcript	75378471	75378693	1000	-	.	gene_id "MSTRG.2012"; transcript_id "Zm00001d029539_T003"; gene_name "Zm00001d029539"; ref_gene_id "Zm00001d029539";
1	StringTie	exon	75378471	75378693	1000	-	.	gene_id "MSTRG.2012"; transcript_id "Zm00001d029539_T003"; exon_number "1"; gene_name "Zm00001d029539"; ref_gene_id "Zm00001d029539";
1	StringTie	transcript	75696304	75696823	1000	-	.	gene_id "MSTRG.2019"; transcript_id "Zm00001d029546_T001"; gene_name "Zm00001d029546"; ref_gene_id "Zm00001d029546";
1	StringTie	exon	75696304	75696490	1000	-	.	gene_id "MSTRG.2019"; transcript_id "Zm00001d029546_T001"; exon_number "1"; gene_name "Zm00001d029546"; ref_gene_id "Zm00001d029546";
1	StringTie	exon	75696606	75696823	1000	-	.	gene_id "MSTRG.2019"; transcript_id "Zm00001d029546_T001"; exon_number "2"; gene_name "Zm00001d029546"; ref_gene_id "Zm00001d029546";
1	StringTie	transcript	75699391	75699552	1000	-	.	gene_id "MSTRG.2021"; transcript_id "Zm00001d029548_T012"; gene_name "csu323"; ref_gene_id "Zm00001d029548";
1	StringTie	exon	75699391	75699552	1000	-	.	gene_id "MSTRG.2021"; transcript_id "Zm00001d029548_T012"; exon_number "1"; gene_name "csu323"; ref_gene_id "Zm00001d029548";
1	StringTie	transcript	75699391	75704508	1000	-	.	gene_id "MSTRG.2021"; transcript_id "Zm00001d029548_T015"; gene_name "csu323"; ref_gene_id "Zm00001d029548";
1	StringTie	exon	75699391	75699552	1000	-	.	gene_id "MSTRG.2021"; transcript_id "Zm00001d029548_T015"; exon_number "1"; gene_name "csu323"; ref_gene_id "Zm00001d029548";
1	StringTie	exon	75701222	75701338	1000	-	.	gene_id "MSTRG.2021"; transcript_id "Zm00001d029548_T015"; exon_number "2"; gene_name "csu323"; ref_gene_id "Zm00001d029548";
1	StringTie	exon	75704423	75704508	1000	-	.	gene_id "MSTRG.2021"; transcript_id "Zm00001d029548_T015"; exon_number "3"; gene_name "csu323"; ref_gene_id "Zm00001d029548";
1	StringTie	transcript	75803738	75804723	1000	-	.	gene_id "MSTRG.2023"; transcript_id "Zm00001d029551_T002"; gene_name "Zm00001d029551"; ref_gene_id "Zm00001d029551";
1	StringTie	exon	75803738	75803796	1000	-	.	gene_id "MSTRG.2023"; transcript_id "Zm00001d029551_T002"; exon_number "1"; gene_name "Zm00001d029551"; ref_gene_id "Zm00001d029551";
1	StringTie	exon	75804479	75804723	1000	-	.	gene_id "MSTRG.2023"; transcript_id "Zm00001d029551_T002"; exon_number "2"; gene_name "Zm00001d029551"; ref_gene_id "Zm00001d029551";
1	StringTie	transcript	76215589	76215940	1000	-	.	gene_id "MSTRG.2032"; transcript_id "Zm00001d029561_T011"; gene_name "Zm00001d029561"; ref_gene_id "Zm00001d029561";
1	StringTie	exon	76215589	76215756	1000	-	.	gene_id "MSTRG.2032"; transcript_id "Zm00001d029561_T011"; exon_number "1"; gene_name "Zm00001d029561"; ref_gene_id "Zm00001d029561";
1	StringTie	exon	76215851	76215940	1000	-	.	gene_id "MSTRG.2032"; transcript_id "Zm00001d029561_T011"; exon_number "2"; gene_name "Zm00001d029561"; ref_gene_id "Zm00001d029561";
1	StringTie	transcript	76615170	76615989	1000	-	.	gene_id "MSTRG.2037"; transcript_id "Zm00001d029567_T003"; gene_name "Zm00001d029567"; ref_gene_id "Zm00001d029567";
1	StringTie	exon	76615170	76615183	1000	-	.	gene_id "MSTRG.2037"; transcript_id "Zm00001d029567_T003"; exon_number "1"; gene_name "Zm00001d029567"; ref_gene_id "Zm00001d029567";
1	StringTie	exon	76615688	76615989	1000	-	.	gene_id "MSTRG.2037"; transcript_id "Zm00001d029567_T003"; exon_number "2"; gene_name "Zm00001d029567"; ref_gene_id "Zm00001d029567";
1	StringTie	transcript	76615674	76615989	1000	-	.	gene_id "MSTRG.2037"; transcript_id "Zm00001d029567_T002"; gene_name "Zm00001d029567"; ref_gene_id "Zm00001d029567";
1	StringTie	exon	76615674	76615989	1000	-	.	gene_id "MSTRG.2037"; transcript_id "Zm00001d029567_T002"; exon_number "1"; gene_name "Zm00001d029567"; ref_gene_id "Zm00001d029567";
1	StringTie	transcript	76869097	76877072	1000	+	.	gene_id "MSTRG.2042"; transcript_id "Zm00001d029572_T001"; gene_name "Zm00001d029572"; ref_gene_id "Zm00001d029572";
1	StringTie	exon	76869097	76869106	1000	+	.	gene_id "MSTRG.2042"; transcript_id "Zm00001d029572_T001"; exon_number "1"; gene_name "Zm00001d029572"; ref_gene_id "Zm00001d029572";
1	StringTie	exon	76876129	76876199	1000	+	.	gene_id "MSTRG.2042"; transcript_id "Zm00001d029572_T001"; exon_number "2"; gene_name "Zm00001d029572"; ref_gene_id "Zm00001d029572";
1	StringTie	exon	76876276	76876344	1000	+	.	gene_id "MSTRG.2042"; transcript_id "Zm00001d029572_T001"; exon_number "3"; gene_name "Zm00001d029572"; ref_gene_id "Zm00001d029572";
1	StringTie	exon	76876428	76877072	1000	+	.	gene_id "MSTRG.2042"; transcript_id "Zm00001d029572_T001"; exon_number "4"; gene_name "Zm00001d029572"; ref_gene_id "Zm00001d029572";
1	StringTie	transcript	78349213	78351415	1000	+	.	gene_id "MSTRG.2065"; transcript_id "Zm00001d029595_T005"; gene_name "Zm00001d029595"; ref_gene_id "Zm00001d029595";
1	StringTie	exon	78349213	78349368	1000	+	.	gene_id "MSTRG.2065"; transcript_id "Zm00001d029595_T005"; exon_number "1"; gene_name "Zm00001d029595"; ref_gene_id "Zm00001d029595";
1	StringTie	exon	78350997	78351415	1000	+	.	gene_id "MSTRG.2065"; transcript_id "Zm00001d029595_T005"; exon_number "2"; gene_name "Zm00001d029595"; ref_gene_id "Zm00001d029595";
1	StringTie	transcript	78349213	78351415	1000	+	.	gene_id "MSTRG.2065"; transcript_id "Zm00001d029595_T001"; gene_name "Zm00001d029595"; ref_gene_id "Zm00001d029595";
1	StringTie	exon	78349213	78349255	1000	+	.	gene_id "MSTRG.2065"; transcript_id "Zm00001d029595_T001"; exon_number "1"; gene_name "Zm00001d029595"; ref_gene_id "Zm00001d029595";
1	StringTie	exon	78349384	78349424	1000	+	.	gene_id "MSTRG.2065"; transcript_id "Zm00001d029595_T001"; exon_number "2"; gene_name "Zm00001d029595"; ref_gene_id "Zm00001d029595";
1	StringTie	exon	78350997	78351415	1000	+	.	gene_id "MSTRG.2065"; transcript_id "Zm00001d029595_T001"; exon_number "3"; gene_name "Zm00001d029595"; ref_gene_id "Zm00001d029595";
1	StringTie	transcript	78349213	78351415	1000	+	.	gene_id "MSTRG.2065"; transcript_id "Zm00001d029595_T004"; gene_name "Zm00001d029595"; ref_gene_id "Zm00001d029595";
1	StringTie	exon	78349213	78349255	1000	+	.	gene_id "MSTRG.2065"; transcript_id "Zm00001d029595_T004"; exon_number "1"; gene_name "Zm00001d029595"; ref_gene_id "Zm00001d029595";
1	StringTie	exon	78349384	78349487	1000	+	.	gene_id "MSTRG.2065"; transcript_id "Zm00001d029595_T004"; exon_number "2"; gene_name "Zm00001d029595"; ref_gene_id "Zm00001d029595";
1	StringTie	exon	78351021	78351415	1000	+	.	gene_id "MSTRG.2065"; transcript_id "Zm00001d029595_T004"; exon_number "3"; gene_name "Zm00001d029595"; ref_gene_id "Zm00001d029595";
1	StringTie	transcript	78349413	78351415	1000	+	.	gene_id "MSTRG.2065"; transcript_id "Zm00001d029595_T003"; gene_name "Zm00001d029595"; ref_gene_id "Zm00001d029595";
1	StringTie	exon	78349413	78349424	1000	+	.	gene_id "MSTRG.2065"; transcript_id "Zm00001d029595_T003"; exon_number "1"; gene_name "Zm00001d029595"; ref_gene_id "Zm00001d029595";
1	StringTie	exon	78350997	78351415	1000	+	.	gene_id "MSTRG.2065"; transcript_id "Zm00001d029595_T003"; exon_number "2"; gene_name "Zm00001d029595"; ref_gene_id "Zm00001d029595";
1	StringTie	transcript	78351021	78351415	1000	+	.	gene_id "MSTRG.2065"; transcript_id "Zm00001d029595_T002"; gene_name "Zm00001d029595"; ref_gene_id "Zm00001d029595";
1	StringTie	exon	78351021	78351415	1000	+	.	gene_id "MSTRG.2065"; transcript_id "Zm00001d029595_T002"; exon_number "1"; gene_name "Zm00001d029595"; ref_gene_id "Zm00001d029595";
1	StringTie	transcript	78654894	78655650	1000	-	.	gene_id "MSTRG.2071"; transcript_id "Zm00001d029601_T002"; gene_name "Zm00001d029601"; ref_gene_id "Zm00001d029601";
1	StringTie	exon	78654894	78655650	1000	-	.	gene_id "MSTRG.2071"; transcript_id "Zm00001d029601_T002"; exon_number "1"; gene_name "Zm00001d029601"; ref_gene_id "Zm00001d029601";
1	StringTie	transcript	78763656	78763899	1000	-	.	gene_id "MSTRG.2072"; transcript_id "Zm00001d029603_T007"; gene_name "Zm00001d029603"; ref_gene_id "Zm00001d029603";
1	StringTie	exon	78763656	78763899	1000	-	.	gene_id "MSTRG.2072"; transcript_id "Zm00001d029603_T007"; exon_number "1"; gene_name "Zm00001d029603"; ref_gene_id "Zm00001d029603";
1	StringTie	transcript	79105229	79105810	1000	-	.	gene_id "MSTRG.2077"; transcript_id "Zm00001d029608_T006"; gene_name "Zm00001d029608"; ref_gene_id "Zm00001d029608";
1	StringTie	exon	79105229	79105240	1000	-	.	gene_id "MSTRG.2077"; transcript_id "Zm00001d029608_T006"; exon_number "1"; gene_name "Zm00001d029608"; ref_gene_id "Zm00001d029608";
1	StringTie	exon	79105479	79105589	1000	-	.	gene_id "MSTRG.2077"; transcript_id "Zm00001d029608_T006"; exon_number "2"; gene_name "Zm00001d029608"; ref_gene_id "Zm00001d029608";
1	StringTie	exon	79105661	79105810	1000	-	.	gene_id "MSTRG.2077"; transcript_id "Zm00001d029608_T006"; exon_number "3"; gene_name "Zm00001d029608"; ref_gene_id "Zm00001d029608";
1	StringTie	transcript	80234318	80234560	1000	-	.	gene_id "MSTRG.2089"; transcript_id "Zm00001d029626_T001"; gene_name "Zm00001d029626"; ref_gene_id "Zm00001d029626";
1	StringTie	exon	80234318	80234560	1000	-	.	gene_id "MSTRG.2089"; transcript_id "Zm00001d029626_T001"; exon_number "1"; gene_name "Zm00001d029626"; ref_gene_id "Zm00001d029626";
1	StringTie	transcript	80761044	80761305	1000	-	.	gene_id "MSTRG.2096"; transcript_id "Zm00001d029632_T004"; gene_name "chloroplast thymidine kinase1"; ref_gene_id "Zm00001d029632";
1	StringTie	exon	80761044	80761305	1000	-	.	gene_id "MSTRG.2096"; transcript_id "Zm00001d029632_T004"; exon_number "1"; gene_name "chloroplast thymidine kinase1"; ref_gene_id "Zm00001d029632";
1	StringTie	transcript	81615075	81615218	1000	-	.	gene_id "MSTRG.2119"; transcript_id "Zm00001d029654_T006"; gene_name "trehalase1"; ref_gene_id "Zm00001d029654";
1	StringTie	exon	81615075	81615218	1000	-	.	gene_id "MSTRG.2119"; transcript_id "Zm00001d029654_T006"; exon_number "1"; gene_name "trehalase1"; ref_gene_id "Zm00001d029654";
1	StringTie	transcript	81676315	81676626	1000	+	.	gene_id "MSTRG.2121"; transcript_id "Zm00001d029657_T002"; gene_name "Zm00001d029657"; ref_gene_id "Zm00001d029657";
1	StringTie	exon	81676315	81676626	1000	+	.	gene_id "MSTRG.2121"; transcript_id "Zm00001d029657_T002"; exon_number "1"; gene_name "Zm00001d029657"; ref_gene_id "Zm00001d029657";
1	StringTie	transcript	81803613	81804108	1000	-	.	gene_id "MSTRG.2128"; transcript_id "Zm00001d029664_T014"; gene_name "Zm00001d029664"; ref_gene_id "Zm00001d029664";
1	StringTie	exon	81803613	81803683	1000	-	.	gene_id "MSTRG.2128"; transcript_id "Zm00001d029664_T014"; exon_number "1"; gene_name "Zm00001d029664"; ref_gene_id "Zm00001d029664";
1	StringTie	exon	81803772	81803874	1000	-	.	gene_id "MSTRG.2128"; transcript_id "Zm00001d029664_T014"; exon_number "2"; gene_name "Zm00001d029664"; ref_gene_id "Zm00001d029664";
1	StringTie	exon	81804025	81804108	1000	-	.	gene_id "MSTRG.2128"; transcript_id "Zm00001d029664_T014"; exon_number "3"; gene_name "Zm00001d029664"; ref_gene_id "Zm00001d029664";
1	StringTie	transcript	82103312	82103796	1000	+	.	gene_id "MSTRG.2134"; transcript_id "Zm00001d029673_T003"; gene_name "Zm00001d029673"; ref_gene_id "Zm00001d029673";
1	StringTie	exon	82103312	82103796	1000	+	.	gene_id "MSTRG.2134"; transcript_id "Zm00001d029673_T003"; exon_number "1"; gene_name "Zm00001d029673"; ref_gene_id "Zm00001d029673";
1	StringTie	transcript	83038371	83038637	1000	+	.	gene_id "MSTRG.2150"; transcript_id "Zm00001d029697_T004"; gene_name "Zm00001d029697"; ref_gene_id "Zm00001d029697";
1	StringTie	exon	83038371	83038637	1000	+	.	gene_id "MSTRG.2150"; transcript_id "Zm00001d029697_T004"; exon_number "1"; gene_name "Zm00001d029697"; ref_gene_id "Zm00001d029697";
1	StringTie	transcript	83059349	83059659	1000	+	.	gene_id "MSTRG.2151"; transcript_id "Zm00001d029699_T001"; gene_name "glutathione transferase42"; ref_gene_id "Zm00001d029699";
1	StringTie	exon	83059349	83059659	1000	+	.	gene_id "MSTRG.2151"; transcript_id "Zm00001d029699_T001"; exon_number "1"; gene_name "glutathione transferase42"; ref_gene_id "Zm00001d029699";
1	StringTie	transcript	84226571	84227369	1000	+	.	gene_id "MSTRG.2178"; transcript_id "Zm00001d029725_T002"; gene_name "csu3"; ref_gene_id "Zm00001d029725";
1	StringTie	exon	84226571	84226617	1000	+	.	gene_id "MSTRG.2178"; transcript_id "Zm00001d029725_T002"; exon_number "1"; gene_name "csu3"; ref_gene_id "Zm00001d029725";
1	StringTie	exon	84227029	84227369	1000	+	.	gene_id "MSTRG.2178"; transcript_id "Zm00001d029725_T002"; exon_number "2"; gene_name "csu3"; ref_gene_id "Zm00001d029725";
1	StringTie	transcript	84229194	84229395	1000	-	.	gene_id "MSTRG.2179"; transcript_id "Zm00001d029726_T006"; gene_name "Zm00001d029726"; ref_gene_id "Zm00001d029726";
1	StringTie	exon	84229194	84229258	1000	-	.	gene_id "MSTRG.2179"; transcript_id "Zm00001d029726_T006"; exon_number "1"; gene_name "Zm00001d029726"; ref_gene_id "Zm00001d029726";
1	StringTie	exon	84229348	84229395	1000	-	.	gene_id "MSTRG.2179"; transcript_id "Zm00001d029726_T006"; exon_number "2"; gene_name "Zm00001d029726"; ref_gene_id "Zm00001d029726";
1	StringTie	transcript	85098799	85099511	1000	+	.	gene_id "MSTRG.2193"; transcript_id "Zm00001d029745_T002"; gene_name "Zm00001d029745"; ref_gene_id "Zm00001d029745";
1	StringTie	exon	85098799	85098885	1000	+	.	gene_id "MSTRG.2193"; transcript_id "Zm00001d029745_T002"; exon_number "1"; gene_name "Zm00001d029745"; ref_gene_id "Zm00001d029745";
1	StringTie	exon	85099099	85099136	1000	+	.	gene_id "MSTRG.2193"; transcript_id "Zm00001d029745_T002"; exon_number "2"; gene_name "Zm00001d029745"; ref_gene_id "Zm00001d029745";
1	StringTie	exon	85099344	85099511	1000	+	.	gene_id "MSTRG.2193"; transcript_id "Zm00001d029745_T002"; exon_number "3"; gene_name "Zm00001d029745"; ref_gene_id "Zm00001d029745";
1	StringTie	transcript	85466727	85472221	1000	-	.	gene_id "MSTRG.2198"; transcript_id "Zm00001d029750_T002"; gene_name "Zm00001d029750"; ref_gene_id "Zm00001d029750";
1	StringTie	exon	85466727	85466746	1000	-	.	gene_id "MSTRG.2198"; transcript_id "Zm00001d029750_T002"; exon_number "1"; gene_name "Zm00001d029750"; ref_gene_id "Zm00001d029750";
1	StringTie	exon	85471747	85472221	1000	-	.	gene_id "MSTRG.2198"; transcript_id "Zm00001d029750_T002"; exon_number "2"; gene_name "Zm00001d029750"; ref_gene_id "Zm00001d029750";
1	StringTie	transcript	85508502	85509564	1000	+	.	gene_id "MSTRG.2200"; transcript_id "Zm00001d029753_T003"; gene_name "Zm00001d029753"; ref_gene_id "Zm00001d029753";
1	StringTie	exon	85508502	85508555	1000	+	.	gene_id "MSTRG.2200"; transcript_id "Zm00001d029753_T003"; exon_number "1"; gene_name "Zm00001d029753"; ref_gene_id "Zm00001d029753";
1	StringTie	exon	85508644	85508697	1000	+	.	gene_id "MSTRG.2200"; transcript_id "Zm00001d029753_T003"; exon_number "2"; gene_name "Zm00001d029753"; ref_gene_id "Zm00001d029753";
1	StringTie	exon	85508796	85508873	1000	+	.	gene_id "MSTRG.2200"; transcript_id "Zm00001d029753_T003"; exon_number "3"; gene_name "Zm00001d029753"; ref_gene_id "Zm00001d029753";
1	StringTie	exon	85509227	85509564	1000	+	.	gene_id "MSTRG.2200"; transcript_id "Zm00001d029753_T003"; exon_number "4"; gene_name "Zm00001d029753"; ref_gene_id "Zm00001d029753";
1	StringTie	transcript	85552618	85554070	1000	-	.	gene_id "MSTRG.2201"; transcript_id "Zm00001d029754_T011"; gene_name "Zm00001d029754"; ref_gene_id "Zm00001d029754";
1	StringTie	exon	85552618	85554070	1000	-	.	gene_id "MSTRG.2201"; transcript_id "Zm00001d029754_T011"; exon_number "1"; gene_name "Zm00001d029754"; ref_gene_id "Zm00001d029754";
1	StringTie	transcript	86004437	86007071	1000	+	.	gene_id "MSTRG.2205"; transcript_id "Zm00001d029758_T002"; gene_name "Zm00001d029758"; ref_gene_id "Zm00001d029758";
1	StringTie	exon	86004437	86004718	1000	+	.	gene_id "MSTRG.2205"; transcript_id "Zm00001d029758_T002"; exon_number "1"; gene_name "Zm00001d029758"; ref_gene_id "Zm00001d029758";
1	StringTie	exon	86005293	86005595	1000	+	.	gene_id "MSTRG.2205"; transcript_id "Zm00001d029758_T002"; exon_number "2"; gene_name "Zm00001d029758"; ref_gene_id "Zm00001d029758";
1	StringTie	exon	86005910	86007071	1000	+	.	gene_id "MSTRG.2205"; transcript_id "Zm00001d029758_T002"; exon_number "3"; gene_name "Zm00001d029758"; ref_gene_id "Zm00001d029758";
1	StringTie	transcript	86133617	86133786	1000	+	.	gene_id "MSTRG.2208"; transcript_id "Zm00001d029762_T003"; gene_name "Zm00001d029762"; ref_gene_id "Zm00001d029762";
1	StringTie	exon	86133617	86133786	1000	+	.	gene_id "MSTRG.2208"; transcript_id "Zm00001d029762_T003"; exon_number "1"; gene_name "Zm00001d029762"; ref_gene_id "Zm00001d029762";
1	StringTie	transcript	86134058	86134531	1000	+	.	gene_id "MSTRG.2208"; transcript_id "Zm00001d029762_T006"; gene_name "Zm00001d029762"; ref_gene_id "Zm00001d029762";
1	StringTie	exon	86134058	86134531	1000	+	.	gene_id "MSTRG.2208"; transcript_id "Zm00001d029762_T006"; exon_number "1"; gene_name "Zm00001d029762"; ref_gene_id "Zm00001d029762";
1	StringTie	transcript	86263178	86264107	1000	-	.	gene_id "MSTRG.2212"; transcript_id "Zm00001d029768_T005"; gene_name "barley mlo defense gene homolog2"; ref_gene_id "Zm00001d029768";
1	StringTie	exon	86263178	86263233	1000	-	.	gene_id "MSTRG.2212"; transcript_id "Zm00001d029768_T005"; exon_number "1"; gene_name "barley mlo defense gene homolog2"; ref_gene_id "Zm00001d029768";
1	StringTie	exon	86263323	86263363	1000	-	.	gene_id "MSTRG.2212"; transcript_id "Zm00001d029768_T005"; exon_number "2"; gene_name "barley mlo defense gene homolog2"; ref_gene_id "Zm00001d029768";
1	StringTie	exon	86264058	86264107	1000	-	.	gene_id "MSTRG.2212"; transcript_id "Zm00001d029768_T005"; exon_number "3"; gene_name "barley mlo defense gene homolog2"; ref_gene_id "Zm00001d029768";
1	StringTie	transcript	86265998	86266872	1000	-	.	gene_id "MSTRG.2212"; transcript_id "Zm00001d029768_T010"; gene_name "barley mlo defense gene homolog2"; ref_gene_id "Zm00001d029768";
1	StringTie	exon	86265998	86266201	1000	-	.	gene_id "MSTRG.2212"; transcript_id "Zm00001d029768_T010"; exon_number "1"; gene_name "barley mlo defense gene homolog2"; ref_gene_id "Zm00001d029768";
1	StringTie	exon	86266238	86266378	1000	-	.	gene_id "MSTRG.2212"; transcript_id "Zm00001d029768_T010"; exon_number "2"; gene_name "barley mlo defense gene homolog2"; ref_gene_id "Zm00001d029768";
1	StringTie	exon	86266581	86266872	1000	-	.	gene_id "MSTRG.2212"; transcript_id "Zm00001d029768_T010"; exon_number "3"; gene_name "barley mlo defense gene homolog2"; ref_gene_id "Zm00001d029768";
1	StringTie	transcript	86529966	86530424	1000	+	.	gene_id "MSTRG.2220"; transcript_id "Zm00001d029778_T001"; gene_name "metallothionein2"; ref_gene_id "Zm00001d029778";
1	StringTie	exon	86529966	86530424	1000	+	.	gene_id "MSTRG.2220"; transcript_id "Zm00001d029778_T001"; exon_number "1"; gene_name "metallothionein2"; ref_gene_id "Zm00001d029778";
1	StringTie	transcript	86636723	86637006	1000	-	.	gene_id "MSTRG.2221"; transcript_id "Zm00001d029782_T010"; gene_name "Zm00001d029782"; ref_gene_id "Zm00001d029782";
1	StringTie	exon	86636723	86636871	1000	-	.	gene_id "MSTRG.2221"; transcript_id "Zm00001d029782_T010"; exon_number "1"; gene_name "Zm00001d029782"; ref_gene_id "Zm00001d029782";
1	StringTie	exon	86636952	86637006	1000	-	.	gene_id "MSTRG.2221"; transcript_id "Zm00001d029782_T010"; exon_number "2"; gene_name "Zm00001d029782"; ref_gene_id "Zm00001d029782";
1	StringTie	transcript	86636723	86641029	1000	-	.	gene_id "MSTRG.2221"; transcript_id "Zm00001d029782_T011"; gene_name "Zm00001d029782"; ref_gene_id "Zm00001d029782";
1	StringTie	exon	86636723	86636871	1000	-	.	gene_id "MSTRG.2221"; transcript_id "Zm00001d029782_T011"; exon_number "1"; gene_name "Zm00001d029782"; ref_gene_id "Zm00001d029782";
1	StringTie	exon	86636952	86637006	1000	-	.	gene_id "MSTRG.2221"; transcript_id "Zm00001d029782_T011"; exon_number "2"; gene_name "Zm00001d029782"; ref_gene_id "Zm00001d029782";
1	StringTie	exon	86640727	86641029	1000	-	.	gene_id "MSTRG.2221"; transcript_id "Zm00001d029782_T011"; exon_number "3"; gene_name "Zm00001d029782"; ref_gene_id "Zm00001d029782";
1	StringTie	transcript	86636723	86638608	1000	-	.	gene_id "MSTRG.2221"; transcript_id "Zm00001d029782_T001"; gene_name "Zm00001d029782"; ref_gene_id "Zm00001d029782";
1	StringTie	exon	86636723	86636824	1000	-	.	gene_id "MSTRG.2221"; transcript_id "Zm00001d029782_T001"; exon_number "1"; gene_name "Zm00001d029782"; ref_gene_id "Zm00001d029782";
1	StringTie	exon	86636917	86637006	1000	-	.	gene_id "MSTRG.2221"; transcript_id "Zm00001d029782_T001"; exon_number "2"; gene_name "Zm00001d029782"; ref_gene_id "Zm00001d029782";
1	StringTie	exon	86638073	86638204	1000	-	.	gene_id "MSTRG.2221"; transcript_id "Zm00001d029782_T001"; exon_number "3"; gene_name "Zm00001d029782"; ref_gene_id "Zm00001d029782";
1	StringTie	exon	86638298	86638608	1000	-	.	gene_id "MSTRG.2221"; transcript_id "Zm00001d029782_T001"; exon_number "4"; gene_name "Zm00001d029782"; ref_gene_id "Zm00001d029782";
1	StringTie	transcript	86734391	86734865	1000	+	.	gene_id "MSTRG.2222"; transcript_id "Zm00001d029783_T004"; gene_name "Zm00001d029783"; ref_gene_id "Zm00001d029783";
1	StringTie	exon	86734391	86734541	1000	+	.	gene_id "MSTRG.2222"; transcript_id "Zm00001d029783_T004"; exon_number "1"; gene_name "Zm00001d029783"; ref_gene_id "Zm00001d029783";
1	StringTie	exon	86734631	86734865	1000	+	.	gene_id "MSTRG.2222"; transcript_id "Zm00001d029783_T004"; exon_number "2"; gene_name "Zm00001d029783"; ref_gene_id "Zm00001d029783";
1	StringTie	transcript	87587159	87587534	1000	-	.	gene_id "MSTRG.2236"; transcript_id "Zm00001d029803_T008"; gene_name "Zm00001d029803"; ref_gene_id "Zm00001d029803";
1	StringTie	exon	87587159	87587221	1000	-	.	gene_id "MSTRG.2236"; transcript_id "Zm00001d029803_T008"; exon_number "1"; gene_name "Zm00001d029803"; ref_gene_id "Zm00001d029803";
1	StringTie	exon	87587292	87587362	1000	-	.	gene_id "MSTRG.2236"; transcript_id "Zm00001d029803_T008"; exon_number "2"; gene_name "Zm00001d029803"; ref_gene_id "Zm00001d029803";
1	StringTie	exon	87587474	87587534	1000	-	.	gene_id "MSTRG.2236"; transcript_id "Zm00001d029803_T008"; exon_number "3"; gene_name "Zm00001d029803"; ref_gene_id "Zm00001d029803";
1	StringTie	transcript	87587277	87587534	1000	-	.	gene_id "MSTRG.2236"; transcript_id "Zm00001d029803_T003"; gene_name "Zm00001d029803"; ref_gene_id "Zm00001d029803";
1	StringTie	exon	87587277	87587362	1000	-	.	gene_id "MSTRG.2236"; transcript_id "Zm00001d029803_T003"; exon_number "1"; gene_name "Zm00001d029803"; ref_gene_id "Zm00001d029803";
1	StringTie	exon	87587474	87587534	1000	-	.	gene_id "MSTRG.2236"; transcript_id "Zm00001d029803_T003"; exon_number "2"; gene_name "Zm00001d029803"; ref_gene_id "Zm00001d029803";
1	StringTie	transcript	87587439	87587534	1000	-	.	gene_id "MSTRG.2236"; transcript_id "Zm00001d029803_T004"; gene_name "Zm00001d029803"; ref_gene_id "Zm00001d029803";
1	StringTie	exon	87587439	87587534	1000	-	.	gene_id "MSTRG.2236"; transcript_id "Zm00001d029803_T004"; exon_number "1"; gene_name "Zm00001d029803"; ref_gene_id "Zm00001d029803";
1	StringTie	transcript	87587439	87588244	1000	-	.	gene_id "MSTRG.2236"; transcript_id "Zm00001d029803_T006"; gene_name "Zm00001d029803"; ref_gene_id "Zm00001d029803";
1	StringTie	exon	87587439	87587534	1000	-	.	gene_id "MSTRG.2236"; transcript_id "Zm00001d029803_T006"; exon_number "1"; gene_name "Zm00001d029803"; ref_gene_id "Zm00001d029803";
1	StringTie	exon	87588016	87588063	1000	-	.	gene_id "MSTRG.2236"; transcript_id "Zm00001d029803_T006"; exon_number "2"; gene_name "Zm00001d029803"; ref_gene_id "Zm00001d029803";
1	StringTie	exon	87588164	87588244	1000	-	.	gene_id "MSTRG.2236"; transcript_id "Zm00001d029803_T006"; exon_number "3"; gene_name "Zm00001d029803"; ref_gene_id "Zm00001d029803";
1	StringTie	transcript	87587439	87587929	1000	-	.	gene_id "MSTRG.2236"; transcript_id "Zm00001d029803_T002"; gene_name "Zm00001d029803"; ref_gene_id "Zm00001d029803";
1	StringTie	exon	87587439	87587534	1000	-	.	gene_id "MSTRG.2236"; transcript_id "Zm00001d029803_T002"; exon_number "1"; gene_name "Zm00001d029803"; ref_gene_id "Zm00001d029803";
1	StringTie	exon	87587558	87587782	1000	-	.	gene_id "MSTRG.2236"; transcript_id "Zm00001d029803_T002"; exon_number "2"; gene_name "Zm00001d029803"; ref_gene_id "Zm00001d029803";
1	StringTie	exon	87587876	87587929	1000	-	.	gene_id "MSTRG.2236"; transcript_id "Zm00001d029803_T002"; exon_number "3"; gene_name "Zm00001d029803"; ref_gene_id "Zm00001d029803";
1	StringTie	transcript	87587439	87588849	1000	-	.	gene_id "MSTRG.2236"; transcript_id "Zm00001d029803_T007"; gene_name "Zm00001d029803"; ref_gene_id "Zm00001d029803";
1	StringTie	exon	87587439	87587534	1000	-	.	gene_id "MSTRG.2236"; transcript_id "Zm00001d029803_T007"; exon_number "1"; gene_name "Zm00001d029803"; ref_gene_id "Zm00001d029803";
1	StringTie	exon	87588128	87588244	1000	-	.	gene_id "MSTRG.2236"; transcript_id "Zm00001d029803_T007"; exon_number "2"; gene_name "Zm00001d029803"; ref_gene_id "Zm00001d029803";
1	StringTie	exon	87588390	87588849	1000	-	.	gene_id "MSTRG.2236"; transcript_id "Zm00001d029803_T007"; exon_number "3"; gene_name "Zm00001d029803"; ref_gene_id "Zm00001d029803";
1	StringTie	transcript	88461903	88462988	1000	+	.	gene_id "MSTRG.2249"; transcript_id "Zm00001d029818_T020"; gene_name "Zm00001d029818"; ref_gene_id "Zm00001d029818";
1	StringTie	exon	88461903	88461920	1000	+	.	gene_id "MSTRG.2249"; transcript_id "Zm00001d029818_T020"; exon_number "1"; gene_name "Zm00001d029818"; ref_gene_id "Zm00001d029818";
1	StringTie	exon	88462008	88462085	1000	+	.	gene_id "MSTRG.2249"; transcript_id "Zm00001d029818_T020"; exon_number "2"; gene_name "Zm00001d029818"; ref_gene_id "Zm00001d029818";
1	StringTie	exon	88462324	88462374	1000	+	.	gene_id "MSTRG.2249"; transcript_id "Zm00001d029818_T020"; exon_number "3"; gene_name "Zm00001d029818"; ref_gene_id "Zm00001d029818";
1	StringTie	exon	88462471	88462988	1000	+	.	gene_id "MSTRG.2249"; transcript_id "Zm00001d029818_T020"; exon_number "4"; gene_name "Zm00001d029818"; ref_gene_id "Zm00001d029818";
1	StringTie	transcript	89562680	89562979	1000	+	.	gene_id "MSTRG.2267"; transcript_id "Zm00001d029839_T006"; gene_name "Zm00001d029839"; ref_gene_id "Zm00001d029839";
1	StringTie	exon	89562680	89562979	1000	+	.	gene_id "MSTRG.2267"; transcript_id "Zm00001d029839_T006"; exon_number "1"; gene_name "Zm00001d029839"; ref_gene_id "Zm00001d029839";
1	StringTie	transcript	89562680	89567492	1000	+	.	gene_id "MSTRG.2267"; transcript_id "Zm00001d029839_T005"; gene_name "Zm00001d029839"; ref_gene_id "Zm00001d029839";
1	StringTie	exon	89562680	89562979	1000	+	.	gene_id "MSTRG.2267"; transcript_id "Zm00001d029839_T005"; exon_number "1"; gene_name "Zm00001d029839"; ref_gene_id "Zm00001d029839";
1	StringTie	exon	89567056	89567492	1000	+	.	gene_id "MSTRG.2267"; transcript_id "Zm00001d029839_T005"; exon_number "2"; gene_name "Zm00001d029839"; ref_gene_id "Zm00001d029839";
1	StringTie	transcript	89930219	89935999	1000	+	.	gene_id "MSTRG.2274"; transcript_id "Zm00001d029848_T006"; gene_name "Zm00001d029848"; ref_gene_id "Zm00001d029848";
1	StringTie	exon	89930219	89930332	1000	+	.	gene_id "MSTRG.2274"; transcript_id "Zm00001d029848_T006"; exon_number "1"; gene_name "Zm00001d029848"; ref_gene_id "Zm00001d029848";
1	StringTie	exon	89934936	89935090	1000	+	.	gene_id "MSTRG.2274"; transcript_id "Zm00001d029848_T006"; exon_number "2"; gene_name "Zm00001d029848"; ref_gene_id "Zm00001d029848";
1	StringTie	exon	89935557	89935999	1000	+	.	gene_id "MSTRG.2274"; transcript_id "Zm00001d029848_T006"; exon_number "3"; gene_name "Zm00001d029848"; ref_gene_id "Zm00001d029848";
1	StringTie	transcript	89930219	89935999	1000	+	.	gene_id "MSTRG.2274"; transcript_id "Zm00001d029848_T007"; gene_name "Zm00001d029848"; ref_gene_id "Zm00001d029848";
1	StringTie	exon	89930219	89930311	1000	+	.	gene_id "MSTRG.2274"; transcript_id "Zm00001d029848_T007"; exon_number "1"; gene_name "Zm00001d029848"; ref_gene_id "Zm00001d029848";
1	StringTie	exon	89930538	89930729	1000	+	.	gene_id "MSTRG.2274"; transcript_id "Zm00001d029848_T007"; exon_number "2"; gene_name "Zm00001d029848"; ref_gene_id "Zm00001d029848";
1	StringTie	exon	89934299	89934463	1000	+	.	gene_id "MSTRG.2274"; transcript_id "Zm00001d029848_T007"; exon_number "3"; gene_name "Zm00001d029848"; ref_gene_id "Zm00001d029848";
1	StringTie	exon	89934936	89935112	1000	+	.	gene_id "MSTRG.2274"; transcript_id "Zm00001d029848_T007"; exon_number "4"; gene_name "Zm00001d029848"; ref_gene_id "Zm00001d029848";
1	StringTie	exon	89935627	89935999	1000	+	.	gene_id "MSTRG.2274"; transcript_id "Zm00001d029848_T007"; exon_number "5"; gene_name "Zm00001d029848"; ref_gene_id "Zm00001d029848";
1	StringTie	transcript	89934299	89935999	1000	+	.	gene_id "MSTRG.2274"; transcript_id "Zm00001d029848_T001"; gene_name "Zm00001d029848"; ref_gene_id "Zm00001d029848";
1	StringTie	exon	89934299	89934463	1000	+	.	gene_id "MSTRG.2274"; transcript_id "Zm00001d029848_T001"; exon_number "1"; gene_name "Zm00001d029848"; ref_gene_id "Zm00001d029848";
1	StringTie	exon	89934936	89935112	1000	+	.	gene_id "MSTRG.2274"; transcript_id "Zm00001d029848_T001"; exon_number "2"; gene_name "Zm00001d029848"; ref_gene_id "Zm00001d029848";
1	StringTie	exon	89935627	89935999	1000	+	.	gene_id "MSTRG.2274"; transcript_id "Zm00001d029848_T001"; exon_number "3"; gene_name "Zm00001d029848"; ref_gene_id "Zm00001d029848";
1	StringTie	transcript	89934936	89935999	1000	+	.	gene_id "MSTRG.2274"; transcript_id "Zm00001d029848_T004"; gene_name "Zm00001d029848"; ref_gene_id "Zm00001d029848";
1	StringTie	exon	89934936	89935090	1000	+	.	gene_id "MSTRG.2274"; transcript_id "Zm00001d029848_T004"; exon_number "1"; gene_name "Zm00001d029848"; ref_gene_id "Zm00001d029848";
1	StringTie	exon	89935557	89935999	1000	+	.	gene_id "MSTRG.2274"; transcript_id "Zm00001d029848_T004"; exon_number "2"; gene_name "Zm00001d029848"; ref_gene_id "Zm00001d029848";
1	StringTie	transcript	89935627	89935999	1000	+	.	gene_id "MSTRG.2274"; transcript_id "Zm00001d029848_T005"; gene_name "Zm00001d029848"; ref_gene_id "Zm00001d029848";
1	StringTie	exon	89935627	89935999	1000	+	.	gene_id "MSTRG.2274"; transcript_id "Zm00001d029848_T005"; exon_number "1"; gene_name "Zm00001d029848"; ref_gene_id "Zm00001d029848";
1	StringTie	transcript	89948225	89949183	1000	+	.	gene_id "MSTRG.2275"; transcript_id "Zm00001d029849_T012"; gene_name "Zm00001d029849"; ref_gene_id "Zm00001d029849";
1	StringTie	exon	89948225	89948381	1000	+	.	gene_id "MSTRG.2275"; transcript_id "Zm00001d029849_T012"; exon_number "1"; gene_name "Zm00001d029849"; ref_gene_id "Zm00001d029849";
1	StringTie	exon	89948917	89949183	1000	+	.	gene_id "MSTRG.2275"; transcript_id "Zm00001d029849_T012"; exon_number "2"; gene_name "Zm00001d029849"; ref_gene_id "Zm00001d029849";
1	StringTie	transcript	89948225	89948972	1000	+	.	gene_id "MSTRG.2275"; transcript_id "Zm00001d029849_T020"; gene_name "Zm00001d029849"; ref_gene_id "Zm00001d029849";
1	StringTie	exon	89948225	89948374	1000	+	.	gene_id "MSTRG.2275"; transcript_id "Zm00001d029849_T020"; exon_number "1"; gene_name "Zm00001d029849"; ref_gene_id "Zm00001d029849";
1	StringTie	exon	89948917	89948972	1000	+	.	gene_id "MSTRG.2275"; transcript_id "Zm00001d029849_T020"; exon_number "2"; gene_name "Zm00001d029849"; ref_gene_id "Zm00001d029849";
1	StringTie	transcript	89948225	89949309	1000	+	.	gene_id "MSTRG.2275"; transcript_id "Zm00001d029849_T017"; gene_name "Zm00001d029849"; ref_gene_id "Zm00001d029849";
1	StringTie	exon	89948225	89948381	1000	+	.	gene_id "MSTRG.2275"; transcript_id "Zm00001d029849_T017"; exon_number "1"; gene_name "Zm00001d029849"; ref_gene_id "Zm00001d029849";
1	StringTie	exon	89948917	89948972	1000	+	.	gene_id "MSTRG.2275"; transcript_id "Zm00001d029849_T017"; exon_number "2"; gene_name "Zm00001d029849"; ref_gene_id "Zm00001d029849";
1	StringTie	exon	89949197	89949309	1000	+	.	gene_id "MSTRG.2275"; transcript_id "Zm00001d029849_T017"; exon_number "3"; gene_name "Zm00001d029849"; ref_gene_id "Zm00001d029849";
1	StringTie	transcript	89951186	89951492	1000	+	.	gene_id "MSTRG.2275"; transcript_id "Zm00001d029849_T009"; gene_name "Zm00001d029849"; ref_gene_id "Zm00001d029849";
1	StringTie	exon	89951186	89951492	1000	+	.	gene_id "MSTRG.2275"; transcript_id "Zm00001d029849_T009"; exon_number "1"; gene_name "Zm00001d029849"; ref_gene_id "Zm00001d029849";
1	StringTie	transcript	91253455	91255023	1000	+	.	gene_id "MSTRG.2297"; transcript_id "Zm00001d029872_T003"; gene_name "Zm00001d029872"; ref_gene_id "Zm00001d029872";
1	StringTie	exon	91253455	91253514	1000	+	.	gene_id "MSTRG.2297"; transcript_id "Zm00001d029872_T003"; exon_number "1"; gene_name "Zm00001d029872"; ref_gene_id "Zm00001d029872";
1	StringTie	exon	91253933	91254014	1000	+	.	gene_id "MSTRG.2297"; transcript_id "Zm00001d029872_T003"; exon_number "2"; gene_name "Zm00001d029872"; ref_gene_id "Zm00001d029872";
1	StringTie	exon	91254596	91255023	1000	+	.	gene_id "MSTRG.2297"; transcript_id "Zm00001d029872_T003"; exon_number "3"; gene_name "Zm00001d029872"; ref_gene_id "Zm00001d029872";
1	StringTie	transcript	91255639	91255982	1000	+	.	gene_id "MSTRG.2297"; transcript_id "Zm00001d029872_T006"; gene_name "Zm00001d029872"; ref_gene_id "Zm00001d029872";
1	StringTie	exon	91255639	91255982	1000	+	.	gene_id "MSTRG.2297"; transcript_id "Zm00001d029872_T006"; exon_number "1"; gene_name "Zm00001d029872"; ref_gene_id "Zm00001d029872";
1	StringTie	transcript	94348391	94348609	1000	-	.	gene_id "MSTRG.2335"; transcript_id "Zm00001d029920_T001"; gene_name "Zm00001d029920"; ref_gene_id "Zm00001d029920";
1	StringTie	exon	94348391	94348609	1000	-	.	gene_id "MSTRG.2335"; transcript_id "Zm00001d029920_T001"; exon_number "1"; gene_name "Zm00001d029920"; ref_gene_id "Zm00001d029920";
1	StringTie	transcript	95646452	95656709	1000	+	.	gene_id "MSTRG.2349"; transcript_id "Zm00001d029938_T008"; gene_name "Zm00001d029938"; ref_gene_id "Zm00001d029938";
1	StringTie	exon	95646452	95646458	1000	+	.	gene_id "MSTRG.2349"; transcript_id "Zm00001d029938_T008"; exon_number "1"; gene_name "Zm00001d029938"; ref_gene_id "Zm00001d029938";
1	StringTie	exon	95656107	95656709	1000	+	.	gene_id "MSTRG.2349"; transcript_id "Zm00001d029938_T008"; exon_number "2"; gene_name "Zm00001d029938"; ref_gene_id "Zm00001d029938";
1	StringTie	transcript	97097388	97099233	1000	+	.	gene_id "MSTRG.2379"; transcript_id "Zm00001d029973_T003"; gene_name "Zm00001d029973"; ref_gene_id "Zm00001d029973";
1	StringTie	exon	97097388	97097414	1000	+	.	gene_id "MSTRG.2379"; transcript_id "Zm00001d029973_T003"; exon_number "1"; gene_name "Zm00001d029973"; ref_gene_id "Zm00001d029973";
1	StringTie	exon	97097436	97097693	1000	+	.	gene_id "MSTRG.2379"; transcript_id "Zm00001d029973_T003"; exon_number "2"; gene_name "Zm00001d029973"; ref_gene_id "Zm00001d029973";
1	StringTie	exon	97098518	97099233	1000	+	.	gene_id "MSTRG.2379"; transcript_id "Zm00001d029973_T003"; exon_number "3"; gene_name "Zm00001d029973"; ref_gene_id "Zm00001d029973";
1	StringTie	transcript	97211458	97214377	1000	+	.	gene_id "MSTRG.2382"; transcript_id "Zm00001d029976_T010"; gene_name "calcineurin B-like1"; ref_gene_id "Zm00001d029976";
1	StringTie	exon	97211458	97211584	1000	+	.	gene_id "MSTRG.2382"; transcript_id "Zm00001d029976_T010"; exon_number "1"; gene_name "calcineurin B-like1"; ref_gene_id "Zm00001d029976";
1	StringTie	exon	97211662	97211783	1000	+	.	gene_id "MSTRG.2382"; transcript_id "Zm00001d029976_T010"; exon_number "2"; gene_name "calcineurin B-like1"; ref_gene_id "Zm00001d029976";
1	StringTie	exon	97212828	97212869	1000	+	.	gene_id "MSTRG.2382"; transcript_id "Zm00001d029976_T010"; exon_number "3"; gene_name "calcineurin B-like1"; ref_gene_id "Zm00001d029976";
1	StringTie	exon	97212979	97213091	1000	+	.	gene_id "MSTRG.2382"; transcript_id "Zm00001d029976_T010"; exon_number "4"; gene_name "calcineurin B-like1"; ref_gene_id "Zm00001d029976";
1	StringTie	exon	97213707	97214377	1000	+	.	gene_id "MSTRG.2382"; transcript_id "Zm00001d029976_T010"; exon_number "5"; gene_name "calcineurin B-like1"; ref_gene_id "Zm00001d029976";
1	StringTie	transcript	97211566	97213295	1000	+	.	gene_id "MSTRG.2382"; transcript_id "Zm00001d029976_T003"; gene_name "calcineurin B-like1"; ref_gene_id "Zm00001d029976";
1	StringTie	exon	97211566	97211584	1000	+	.	gene_id "MSTRG.2382"; transcript_id "Zm00001d029976_T003"; exon_number "1"; gene_name "calcineurin B-like1"; ref_gene_id "Zm00001d029976";
1	StringTie	exon	97211662	97211714	1000	+	.	gene_id "MSTRG.2382"; transcript_id "Zm00001d029976_T003"; exon_number "2"; gene_name "calcineurin B-like1"; ref_gene_id "Zm00001d029976";
1	StringTie	exon	97212789	97212869	1000	+	.	gene_id "MSTRG.2382"; transcript_id "Zm00001d029976_T003"; exon_number "3"; gene_name "calcineurin B-like1"; ref_gene_id "Zm00001d029976";
1	StringTie	exon	97212979	97213295	1000	+	.	gene_id "MSTRG.2382"; transcript_id "Zm00001d029976_T003"; exon_number "4"; gene_name "calcineurin B-like1"; ref_gene_id "Zm00001d029976";
1	StringTie	transcript	97211566	97214377	1000	+	.	gene_id "MSTRG.2382"; transcript_id "Zm00001d029976_T008"; gene_name "calcineurin B-like1"; ref_gene_id "Zm00001d029976";
1	StringTie	exon	97211566	97211584	1000	+	.	gene_id "MSTRG.2382"; transcript_id "Zm00001d029976_T008"; exon_number "1"; gene_name "calcineurin B-like1"; ref_gene_id "Zm00001d029976";
1	StringTie	exon	97211662	97211714	1000	+	.	gene_id "MSTRG.2382"; transcript_id "Zm00001d029976_T008"; exon_number "2"; gene_name "calcineurin B-like1"; ref_gene_id "Zm00001d029976";
1	StringTie	exon	97212789	97212911	1000	+	.	gene_id "MSTRG.2382"; transcript_id "Zm00001d029976_T008"; exon_number "3"; gene_name "calcineurin B-like1"; ref_gene_id "Zm00001d029976";
1	StringTie	exon	97213072	97213091	1000	+	.	gene_id "MSTRG.2382"; transcript_id "Zm00001d029976_T008"; exon_number "4"; gene_name "calcineurin B-like1"; ref_gene_id "Zm00001d029976";
1	StringTie	exon	97213707	97214377	1000	+	.	gene_id "MSTRG.2382"; transcript_id "Zm00001d029976_T008"; exon_number "5"; gene_name "calcineurin B-like1"; ref_gene_id "Zm00001d029976";
1	StringTie	transcript	97212828	97214377	1000	+	.	gene_id "MSTRG.2382"; transcript_id "Zm00001d029976_T007"; gene_name "calcineurin B-like1"; ref_gene_id "Zm00001d029976";
1	StringTie	exon	97212828	97212869	1000	+	.	gene_id "MSTRG.2382"; transcript_id "Zm00001d029976_T007"; exon_number "1"; gene_name "calcineurin B-like1"; ref_gene_id "Zm00001d029976";
1	StringTie	exon	97212979	97213091	1000	+	.	gene_id "MSTRG.2382"; transcript_id "Zm00001d029976_T007"; exon_number "2"; gene_name "calcineurin B-like1"; ref_gene_id "Zm00001d029976";
1	StringTie	exon	97213707	97214377	1000	+	.	gene_id "MSTRG.2382"; transcript_id "Zm00001d029976_T007"; exon_number "3"; gene_name "calcineurin B-like1"; ref_gene_id "Zm00001d029976";
1	StringTie	transcript	97311922	97315853	1000	+	.	gene_id "MSTRG.2383"; transcript_id "Zm00001d029978_T004"; gene_name "Zm00001d029978"; ref_gene_id "Zm00001d029978";
1	StringTie	exon	97311922	97315853	1000	+	.	gene_id "MSTRG.2383"; transcript_id "Zm00001d029978_T004"; exon_number "1"; gene_name "Zm00001d029978"; ref_gene_id "Zm00001d029978";
1	StringTie	transcript	97316974	97317291	1000	+	.	gene_id "MSTRG.2383"; transcript_id "Zm00001d029978_T001"; gene_name "Zm00001d029978"; ref_gene_id "Zm00001d029978";
1	StringTie	exon	97316974	97317291	1000	+	.	gene_id "MSTRG.2383"; transcript_id "Zm00001d029978_T001"; exon_number "1"; gene_name "Zm00001d029978"; ref_gene_id "Zm00001d029978";
1	StringTie	transcript	97333792	97334708	1000	+	.	gene_id "MSTRG.2385"; transcript_id "Zm00001d029980_T001"; gene_name "Zm00001d029980"; ref_gene_id "Zm00001d029980";
1	StringTie	exon	97333792	97334708	1000	+	.	gene_id "MSTRG.2385"; transcript_id "Zm00001d029980_T001"; exon_number "1"; gene_name "Zm00001d029980"; ref_gene_id "Zm00001d029980";
1	StringTie	transcript	97704588	97705764	1000	-	.	gene_id "MSTRG.2391"; transcript_id "Zm00001d029988_T002"; gene_name "Zm00001d029988"; ref_gene_id "Zm00001d029988";
1	StringTie	exon	97704588	97704684	1000	-	.	gene_id "MSTRG.2391"; transcript_id "Zm00001d029988_T002"; exon_number "1"; gene_name "Zm00001d029988"; ref_gene_id "Zm00001d029988";
1	StringTie	exon	97705123	97705136	1000	-	.	gene_id "MSTRG.2391"; transcript_id "Zm00001d029988_T002"; exon_number "2"; gene_name "Zm00001d029988"; ref_gene_id "Zm00001d029988";
1	StringTie	exon	97705219	97705392	1000	-	.	gene_id "MSTRG.2391"; transcript_id "Zm00001d029988_T002"; exon_number "3"; gene_name "Zm00001d029988"; ref_gene_id "Zm00001d029988";
1	StringTie	exon	97705713	97705764	1000	-	.	gene_id "MSTRG.2391"; transcript_id "Zm00001d029988_T002"; exon_number "4"; gene_name "Zm00001d029988"; ref_gene_id "Zm00001d029988";
1	StringTie	transcript	98383085	98384060	1000	+	.	gene_id "MSTRG.2397"; transcript_id "Zm00001d029997_T003"; gene_name "Zm00001d029997"; ref_gene_id "Zm00001d029997";
1	StringTie	exon	98383085	98383093	1000	+	.	gene_id "MSTRG.2397"; transcript_id "Zm00001d029997_T003"; exon_number "1"; gene_name "Zm00001d029997"; ref_gene_id "Zm00001d029997";
1	StringTie	exon	98383181	98383228	1000	+	.	gene_id "MSTRG.2397"; transcript_id "Zm00001d029997_T003"; exon_number "2"; gene_name "Zm00001d029997"; ref_gene_id "Zm00001d029997";
1	StringTie	exon	98383770	98383799	1000	+	.	gene_id "MSTRG.2397"; transcript_id "Zm00001d029997_T003"; exon_number "3"; gene_name "Zm00001d029997"; ref_gene_id "Zm00001d029997";
1	StringTie	exon	98383901	98384060	1000	+	.	gene_id "MSTRG.2397"; transcript_id "Zm00001d029997_T003"; exon_number "4"; gene_name "Zm00001d029997"; ref_gene_id "Zm00001d029997";
1	StringTie	transcript	99421410	99421782	1000	+	.	gene_id "MSTRG.2412"; transcript_id "Zm00001d030014_T005"; gene_name "Zm00001d030014"; ref_gene_id "Zm00001d030014";
1	StringTie	exon	99421410	99421782	1000	+	.	gene_id "MSTRG.2412"; transcript_id "Zm00001d030014_T005"; exon_number "1"; gene_name "Zm00001d030014"; ref_gene_id "Zm00001d030014";
1	StringTie	transcript	99940445	99944552	1000	+	.	gene_id "MSTRG.2418"; transcript_id "Zm00001d030019_T003"; gene_name "Zm00001d030019"; ref_gene_id "Zm00001d030019";
1	StringTie	exon	99940445	99940557	1000	+	.	gene_id "MSTRG.2418"; transcript_id "Zm00001d030019_T003"; exon_number "1"; gene_name "Zm00001d030019"; ref_gene_id "Zm00001d030019";
1	StringTie	exon	99940675	99940804	1000	+	.	gene_id "MSTRG.2418"; transcript_id "Zm00001d030019_T003"; exon_number "2"; gene_name "Zm00001d030019"; ref_gene_id "Zm00001d030019";
1	StringTie	exon	99944036	99944059	1000	+	.	gene_id "MSTRG.2418"; transcript_id "Zm00001d030019_T003"; exon_number "3"; gene_name "Zm00001d030019"; ref_gene_id "Zm00001d030019";
1	StringTie	exon	99944206	99944552	1000	+	.	gene_id "MSTRG.2418"; transcript_id "Zm00001d030019_T003"; exon_number "4"; gene_name "Zm00001d030019"; ref_gene_id "Zm00001d030019";
1	StringTie	transcript	99944036	99944552	1000	+	.	gene_id "MSTRG.2418"; transcript_id "Zm00001d030019_T002"; gene_name "Zm00001d030019"; ref_gene_id "Zm00001d030019";
1	StringTie	exon	99944036	99944059	1000	+	.	gene_id "MSTRG.2418"; transcript_id "Zm00001d030019_T002"; exon_number "1"; gene_name "Zm00001d030019"; ref_gene_id "Zm00001d030019";
1	StringTie	exon	99944206	99944552	1000	+	.	gene_id "MSTRG.2418"; transcript_id "Zm00001d030019_T002"; exon_number "2"; gene_name "Zm00001d030019"; ref_gene_id "Zm00001d030019";
1	StringTie	transcript	99948169	99950192	1000	+	.	gene_id "MSTRG.2419"; transcript_id "Zm00001d030020_T005"; gene_name "pyruvate kinase1"; ref_gene_id "Zm00001d030020";
1	StringTie	exon	99948169	99948225	1000	+	.	gene_id "MSTRG.2419"; transcript_id "Zm00001d030020_T005"; exon_number "1"; gene_name "pyruvate kinase1"; ref_gene_id "Zm00001d030020";
1	StringTie	exon	99948358	99948540	1000	+	.	gene_id "MSTRG.2419"; transcript_id "Zm00001d030020_T005"; exon_number "2"; gene_name "pyruvate kinase1"; ref_gene_id "Zm00001d030020";
1	StringTie	exon	99949560	99949778	1000	+	.	gene_id "MSTRG.2419"; transcript_id "Zm00001d030020_T005"; exon_number "3"; gene_name "pyruvate kinase1"; ref_gene_id "Zm00001d030020";
1	StringTie	exon	99949996	99950192	1000	+	.	gene_id "MSTRG.2419"; transcript_id "Zm00001d030020_T005"; exon_number "4"; gene_name "pyruvate kinase1"; ref_gene_id "Zm00001d030020";
1	StringTie	transcript	100086863	100087217	1000	+	.	gene_id "MSTRG.2420"; transcript_id "Zm00001d030021_T009"; gene_name "Zm00001d030021"; ref_gene_id "Zm00001d030021";
1	StringTie	exon	100086863	100087217	1000	+	.	gene_id "MSTRG.2420"; transcript_id "Zm00001d030021_T009"; exon_number "1"; gene_name "Zm00001d030021"; ref_gene_id "Zm00001d030021";
1	StringTie	transcript	100386165	100386641	1000	+	.	gene_id "MSTRG.2421"; transcript_id "Zm00001d030023_T001"; gene_name "NAC-transcription factor43"; ref_gene_id "Zm00001d030023";
1	StringTie	exon	100386165	100386641	1000	+	.	gene_id "MSTRG.2421"; transcript_id "Zm00001d030023_T001"; exon_number "1"; gene_name "NAC-transcription factor43"; ref_gene_id "Zm00001d030023";
1	StringTie	transcript	100636256	100636649	1000	+	.	gene_id "MSTRG.2423"; transcript_id "Zm00001d030026_T034"; gene_name "Zm00001d030026"; ref_gene_id "Zm00001d030026";
1	StringTie	exon	100636256	100636649	1000	+	.	gene_id "MSTRG.2423"; transcript_id "Zm00001d030026_T034"; exon_number "1"; gene_name "Zm00001d030026"; ref_gene_id "Zm00001d030026";
1	StringTie	transcript	100836147	100836426	1000	+	.	gene_id "MSTRG.2427"; transcript_id "Zm00001d030031_T008"; gene_name "Zm00001d030031"; ref_gene_id "Zm00001d030031";
1	StringTie	exon	100836147	100836426	1000	+	.	gene_id "MSTRG.2427"; transcript_id "Zm00001d030031_T008"; exon_number "1"; gene_name "Zm00001d030031"; ref_gene_id "Zm00001d030031";
1	StringTie	transcript	100836147	100837086	1000	+	.	gene_id "MSTRG.2427"; transcript_id "Zm00001d030031_T007"; gene_name "Zm00001d030031"; ref_gene_id "Zm00001d030031";
1	StringTie	exon	100836147	100836426	1000	+	.	gene_id "MSTRG.2427"; transcript_id "Zm00001d030031_T007"; exon_number "1"; gene_name "Zm00001d030031"; ref_gene_id "Zm00001d030031";
1	StringTie	exon	100836578	100837086	1000	+	.	gene_id "MSTRG.2427"; transcript_id "Zm00001d030031_T007"; exon_number "2"; gene_name "Zm00001d030031"; ref_gene_id "Zm00001d030031";
1	StringTie	transcript	100836147	100838223	1000	+	.	gene_id "MSTRG.2427"; transcript_id "Zm00001d030031_T003"; gene_name "Zm00001d030031"; ref_gene_id "Zm00001d030031";
1	StringTie	exon	100836147	100836426	1000	+	.	gene_id "MSTRG.2427"; transcript_id "Zm00001d030031_T003"; exon_number "1"; gene_name "Zm00001d030031"; ref_gene_id "Zm00001d030031";
1	StringTie	exon	100836578	100836777	1000	+	.	gene_id "MSTRG.2427"; transcript_id "Zm00001d030031_T003"; exon_number "2"; gene_name "Zm00001d030031"; ref_gene_id "Zm00001d030031";
1	StringTie	exon	100837794	100838223	1000	+	.	gene_id "MSTRG.2427"; transcript_id "Zm00001d030031_T003"; exon_number "3"; gene_name "Zm00001d030031"; ref_gene_id "Zm00001d030031";
1	StringTie	transcript	100836147	100837793	1000	+	.	gene_id "MSTRG.2427"; transcript_id "Zm00001d030031_T004"; gene_name "Zm00001d030031"; ref_gene_id "Zm00001d030031";
1	StringTie	exon	100836147	100836426	1000	+	.	gene_id "MSTRG.2427"; transcript_id "Zm00001d030031_T004"; exon_number "1"; gene_name "Zm00001d030031"; ref_gene_id "Zm00001d030031";
1	StringTie	exon	100836578	100836696	1000	+	.	gene_id "MSTRG.2427"; transcript_id "Zm00001d030031_T004"; exon_number "2"; gene_name "Zm00001d030031"; ref_gene_id "Zm00001d030031";
1	StringTie	exon	100837756	100837793	1000	+	.	gene_id "MSTRG.2427"; transcript_id "Zm00001d030031_T004"; exon_number "3"; gene_name "Zm00001d030031"; ref_gene_id "Zm00001d030031";
1	StringTie	transcript	101179065	101179297	1000	+	.	gene_id "MSTRG.2429"; transcript_id "Zm00001d030034_T003"; gene_name "Zm00001d030034"; ref_gene_id "Zm00001d030034";
1	StringTie	exon	101179065	101179297	1000	+	.	gene_id "MSTRG.2429"; transcript_id "Zm00001d030034_T003"; exon_number "1"; gene_name "Zm00001d030034"; ref_gene_id "Zm00001d030034";
1	StringTie	transcript	102215736	102216477	1000	+	.	gene_id "MSTRG.2445"; transcript_id "Zm00001d030051_T001"; gene_name "Zm00001d030051"; ref_gene_id "Zm00001d030051";
1	StringTie	exon	102215736	102215969	1000	+	.	gene_id "MSTRG.2445"; transcript_id "Zm00001d030051_T001"; exon_number "1"; gene_name "Zm00001d030051"; ref_gene_id "Zm00001d030051";
1	StringTie	exon	102216091	102216138	1000	+	.	gene_id "MSTRG.2445"; transcript_id "Zm00001d030051_T001"; exon_number "2"; gene_name "Zm00001d030051"; ref_gene_id "Zm00001d030051";
1	StringTie	exon	102216161	102216477	1000	+	.	gene_id "MSTRG.2445"; transcript_id "Zm00001d030051_T001"; exon_number "3"; gene_name "Zm00001d030051"; ref_gene_id "Zm00001d030051";
1	StringTie	transcript	102215736	102216477	1000	+	.	gene_id "MSTRG.2445"; transcript_id "Zm00001d030051_T002"; gene_name "Zm00001d030051"; ref_gene_id "Zm00001d030051";
1	StringTie	exon	102215736	102215867	1000	+	.	gene_id "MSTRG.2445"; transcript_id "Zm00001d030051_T002"; exon_number "1"; gene_name "Zm00001d030051"; ref_gene_id "Zm00001d030051";
1	StringTie	exon	102215907	102215969	1000	+	.	gene_id "MSTRG.2445"; transcript_id "Zm00001d030051_T002"; exon_number "2"; gene_name "Zm00001d030051"; ref_gene_id "Zm00001d030051";
1	StringTie	exon	102216091	102216138	1000	+	.	gene_id "MSTRG.2445"; transcript_id "Zm00001d030051_T002"; exon_number "3"; gene_name "Zm00001d030051"; ref_gene_id "Zm00001d030051";
1	StringTie	exon	102216161	102216477	1000	+	.	gene_id "MSTRG.2445"; transcript_id "Zm00001d030051_T002"; exon_number "4"; gene_name "Zm00001d030051"; ref_gene_id "Zm00001d030051";
1	StringTie	transcript	102216091	102216477	1000	+	.	gene_id "MSTRG.2445"; transcript_id "Zm00001d030051_T006"; gene_name "Zm00001d030051"; ref_gene_id "Zm00001d030051";
1	StringTie	exon	102216091	102216138	1000	+	.	gene_id "MSTRG.2445"; transcript_id "Zm00001d030051_T006"; exon_number "1"; gene_name "Zm00001d030051"; ref_gene_id "Zm00001d030051";
1	StringTie	exon	102216161	102216477	1000	+	.	gene_id "MSTRG.2445"; transcript_id "Zm00001d030051_T006"; exon_number "2"; gene_name "Zm00001d030051"; ref_gene_id "Zm00001d030051";
1	StringTie	transcript	102359982	102363045	1000	+	.	gene_id "MSTRG.2446"; transcript_id "Zm00001d030053_T006"; gene_name "Zm00001d030053"; ref_gene_id "Zm00001d030053";
1	StringTie	exon	102359982	102360127	1000	+	.	gene_id "MSTRG.2446"; transcript_id "Zm00001d030053_T006"; exon_number "1"; gene_name "Zm00001d030053"; ref_gene_id "Zm00001d030053";
1	StringTie	exon	102362815	102363045	1000	+	.	gene_id "MSTRG.2446"; transcript_id "Zm00001d030053_T006"; exon_number "2"; gene_name "Zm00001d030053"; ref_gene_id "Zm00001d030053";
1	StringTie	transcript	104118966	104119586	1000	-	.	gene_id "MSTRG.2466"; transcript_id "Zm00001d030079_T001"; gene_name "Zm00001d030079"; ref_gene_id "Zm00001d030079";
1	StringTie	exon	104118966	104119039	1000	-	.	gene_id "MSTRG.2466"; transcript_id "Zm00001d030079_T001"; exon_number "1"; gene_name "Zm00001d030079"; ref_gene_id "Zm00001d030079";
1	StringTie	exon	104119213	104119323	1000	-	.	gene_id "MSTRG.2466"; transcript_id "Zm00001d030079_T001"; exon_number "2"; gene_name "Zm00001d030079"; ref_gene_id "Zm00001d030079";
1	StringTie	exon	104119420	104119586	1000	-	.	gene_id "MSTRG.2466"; transcript_id "Zm00001d030079_T001"; exon_number "3"; gene_name "Zm00001d030079"; ref_gene_id "Zm00001d030079";
1	StringTie	transcript	104670117	104673155	1000	-	.	gene_id "MSTRG.2470"; transcript_id "Zm00001d030087_T001"; gene_name "Zm00001d030087"; ref_gene_id "Zm00001d030087";
1	StringTie	exon	104670117	104670236	1000	-	.	gene_id "MSTRG.2470"; transcript_id "Zm00001d030087_T001"; exon_number "1"; gene_name "Zm00001d030087"; ref_gene_id "Zm00001d030087";
1	StringTie	exon	104670390	104673155	1000	-	.	gene_id "MSTRG.2470"; transcript_id "Zm00001d030087_T001"; exon_number "2"; gene_name "Zm00001d030087"; ref_gene_id "Zm00001d030087";
1	StringTie	transcript	105700396	105700731	1000	-	.	gene_id "MSTRG.2483"; transcript_id "Zm00001d030101_T002"; gene_name "Zm00001d030101"; ref_gene_id "Zm00001d030101";
1	StringTie	exon	105700396	105700731	1000	-	.	gene_id "MSTRG.2483"; transcript_id "Zm00001d030101_T002"; exon_number "1"; gene_name "Zm00001d030101"; ref_gene_id "Zm00001d030101";
1	StringTie	transcript	106184969	106185963	1000	+	.	gene_id "MSTRG.2488"; transcript_id "Zm00001d030108_T025"; gene_name "JUMONJI-transcription factor 14"; ref_gene_id "Zm00001d030108";
1	StringTie	exon	106184969	106185963	1000	+	.	gene_id "MSTRG.2488"; transcript_id "Zm00001d030108_T025"; exon_number "1"; gene_name "JUMONJI-transcription factor 14"; ref_gene_id "Zm00001d030108";
1	StringTie	transcript	106379261	106379918	1000	-	.	gene_id "MSTRG.2490"; transcript_id "Zm00001d030110_T023"; gene_name "Zm00001d030110"; ref_gene_id "Zm00001d030110";
1	StringTie	exon	106379261	106379329	1000	-	.	gene_id "MSTRG.2490"; transcript_id "Zm00001d030110_T023"; exon_number "1"; gene_name "Zm00001d030110"; ref_gene_id "Zm00001d030110";
1	StringTie	exon	106379594	106379689	1000	-	.	gene_id "MSTRG.2490"; transcript_id "Zm00001d030110_T023"; exon_number "2"; gene_name "Zm00001d030110"; ref_gene_id "Zm00001d030110";
1	StringTie	exon	106379787	106379918	1000	-	.	gene_id "MSTRG.2490"; transcript_id "Zm00001d030110_T023"; exon_number "3"; gene_name "Zm00001d030110"; ref_gene_id "Zm00001d030110";
1	StringTie	transcript	106379261	106379918	1000	-	.	gene_id "MSTRG.2490"; transcript_id "Zm00001d030110_T029"; gene_name "Zm00001d030110"; ref_gene_id "Zm00001d030110";
1	StringTie	exon	106379261	106379326	1000	-	.	gene_id "MSTRG.2490"; transcript_id "Zm00001d030110_T029"; exon_number "1"; gene_name "Zm00001d030110"; ref_gene_id "Zm00001d030110";
1	StringTie	exon	106379594	106379689	1000	-	.	gene_id "MSTRG.2490"; transcript_id "Zm00001d030110_T029"; exon_number "2"; gene_name "Zm00001d030110"; ref_gene_id "Zm00001d030110";
1	StringTie	exon	106379787	106379918	1000	-	.	gene_id "MSTRG.2490"; transcript_id "Zm00001d030110_T029"; exon_number "3"; gene_name "Zm00001d030110"; ref_gene_id "Zm00001d030110";
1	StringTie	transcript	106379261	106381027	1000	-	.	gene_id "MSTRG.2490"; transcript_id "Zm00001d030110_T018"; gene_name "Zm00001d030110"; ref_gene_id "Zm00001d030110";
1	StringTie	exon	106379261	106379326	1000	-	.	gene_id "MSTRG.2490"; transcript_id "Zm00001d030110_T018"; exon_number "1"; gene_name "Zm00001d030110"; ref_gene_id "Zm00001d030110";
1	StringTie	exon	106379594	106379689	1000	-	.	gene_id "MSTRG.2490"; transcript_id "Zm00001d030110_T018"; exon_number "2"; gene_name "Zm00001d030110"; ref_gene_id "Zm00001d030110";
1	StringTie	exon	106379787	106379918	1000	-	.	gene_id "MSTRG.2490"; transcript_id "Zm00001d030110_T018"; exon_number "3"; gene_name "Zm00001d030110"; ref_gene_id "Zm00001d030110";
1	StringTie	exon	106380231	106380352	1000	-	.	gene_id "MSTRG.2490"; transcript_id "Zm00001d030110_T018"; exon_number "4"; gene_name "Zm00001d030110"; ref_gene_id "Zm00001d030110";
1	StringTie	exon	106381021	106381027	1000	-	.	gene_id "MSTRG.2490"; transcript_id "Zm00001d030110_T018"; exon_number "5"; gene_name "Zm00001d030110"; ref_gene_id "Zm00001d030110";
1	StringTie	transcript	106379261	106383615	1000	-	.	gene_id "MSTRG.2490"; transcript_id "Zm00001d030110_T012"; gene_name "Zm00001d030110"; ref_gene_id "Zm00001d030110";
1	StringTie	exon	106379261	106379326	1000	-	.	gene_id "MSTRG.2490"; transcript_id "Zm00001d030110_T012"; exon_number "1"; gene_name "Zm00001d030110"; ref_gene_id "Zm00001d030110";
1	StringTie	exon	106379594	106379689	1000	-	.	gene_id "MSTRG.2490"; transcript_id "Zm00001d030110_T012"; exon_number "2"; gene_name "Zm00001d030110"; ref_gene_id "Zm00001d030110";
1	StringTie	exon	106379787	106379816	1000	-	.	gene_id "MSTRG.2490"; transcript_id "Zm00001d030110_T012"; exon_number "3"; gene_name "Zm00001d030110"; ref_gene_id "Zm00001d030110";
1	StringTie	exon	106382219	106382309	1000	-	.	gene_id "MSTRG.2490"; transcript_id "Zm00001d030110_T012"; exon_number "4"; gene_name "Zm00001d030110"; ref_gene_id "Zm00001d030110";
1	StringTie	exon	106383244	106383615	1000	-	.	gene_id "MSTRG.2490"; transcript_id "Zm00001d030110_T012"; exon_number "5"; gene_name "Zm00001d030110"; ref_gene_id "Zm00001d030110";
1	StringTie	transcript	106379261	106383615	1000	-	.	gene_id "MSTRG.2490"; transcript_id "Zm00001d030110_T017"; gene_name "Zm00001d030110"; ref_gene_id "Zm00001d030110";
1	StringTie	exon	106379261	106379329	1000	-	.	gene_id "MSTRG.2490"; transcript_id "Zm00001d030110_T017"; exon_number "1"; gene_name "Zm00001d030110"; ref_gene_id "Zm00001d030110";
1	StringTie	exon	106379594	106379689	1000	-	.	gene_id "MSTRG.2490"; transcript_id "Zm00001d030110_T017"; exon_number "2"; gene_name "Zm00001d030110"; ref_gene_id "Zm00001d030110";
1	StringTie	exon	106379787	106379816	1000	-	.	gene_id "MSTRG.2490"; transcript_id "Zm00001d030110_T017"; exon_number "3"; gene_name "Zm00001d030110"; ref_gene_id "Zm00001d030110";
1	StringTie	exon	106382219	106382309	1000	-	.	gene_id "MSTRG.2490"; transcript_id "Zm00001d030110_T017"; exon_number "4"; gene_name "Zm00001d030110"; ref_gene_id "Zm00001d030110";
1	StringTie	exon	106383244	106383615	1000	-	.	gene_id "MSTRG.2490"; transcript_id "Zm00001d030110_T017"; exon_number "5"; gene_name "Zm00001d030110"; ref_gene_id "Zm00001d030110";
1	StringTie	transcript	106379261	106383615	1000	-	.	gene_id "MSTRG.2490"; transcript_id "Zm00001d030110_T028"; gene_name "Zm00001d030110"; ref_gene_id "Zm00001d030110";
1	StringTie	exon	106379261	106379326	1000	-	.	gene_id "MSTRG.2490"; transcript_id "Zm00001d030110_T028"; exon_number "1"; gene_name "Zm00001d030110"; ref_gene_id "Zm00001d030110";
1	StringTie	exon	106379594	106379689	1000	-	.	gene_id "MSTRG.2490"; transcript_id "Zm00001d030110_T028"; exon_number "2"; gene_name "Zm00001d030110"; ref_gene_id "Zm00001d030110";
1	StringTie	exon	106379787	106379918	1000	-	.	gene_id "MSTRG.2490"; transcript_id "Zm00001d030110_T028"; exon_number "3"; gene_name "Zm00001d030110"; ref_gene_id "Zm00001d030110";
1	StringTie	exon	106382219	106382309	1000	-	.	gene_id "MSTRG.2490"; transcript_id "Zm00001d030110_T028"; exon_number "4"; gene_name "Zm00001d030110"; ref_gene_id "Zm00001d030110";
1	StringTie	exon	106383244	106383615	1000	-	.	gene_id "MSTRG.2490"; transcript_id "Zm00001d030110_T028"; exon_number "5"; gene_name "Zm00001d030110"; ref_gene_id "Zm00001d030110";
1	StringTie	transcript	106379588	106379918	1000	-	.	gene_id "MSTRG.2490"; transcript_id "Zm00001d030110_T021"; gene_name "Zm00001d030110"; ref_gene_id "Zm00001d030110";
1	StringTie	exon	106379588	106379689	1000	-	.	gene_id "MSTRG.2490"; transcript_id "Zm00001d030110_T021"; exon_number "1"; gene_name "Zm00001d030110"; ref_gene_id "Zm00001d030110";
1	StringTie	exon	106379787	106379918	1000	-	.	gene_id "MSTRG.2490"; transcript_id "Zm00001d030110_T021"; exon_number "2"; gene_name "Zm00001d030110"; ref_gene_id "Zm00001d030110";
1	StringTie	transcript	106379685	106379918	1000	-	.	gene_id "MSTRG.2490"; transcript_id "Zm00001d030110_T009"; gene_name "Zm00001d030110"; ref_gene_id "Zm00001d030110";
1	StringTie	exon	106379685	106379918	1000	-	.	gene_id "MSTRG.2490"; transcript_id "Zm00001d030110_T009"; exon_number "1"; gene_name "Zm00001d030110"; ref_gene_id "Zm00001d030110";
1	StringTie	transcript	106379685	106383615	1000	-	.	gene_id "MSTRG.2490"; transcript_id "Zm00001d030110_T014"; gene_name "Zm00001d030110"; ref_gene_id "Zm00001d030110";
1	StringTie	exon	106379685	106379918	1000	-	.	gene_id "MSTRG.2490"; transcript_id "Zm00001d030110_T014"; exon_number "1"; gene_name "Zm00001d030110"; ref_gene_id "Zm00001d030110";
1	StringTie	exon	106382219	106382309	1000	-	.	gene_id "MSTRG.2490"; transcript_id "Zm00001d030110_T014"; exon_number "2"; gene_name "Zm00001d030110"; ref_gene_id "Zm00001d030110";
1	StringTie	exon	106383244	106383615	1000	-	.	gene_id "MSTRG.2490"; transcript_id "Zm00001d030110_T014"; exon_number "3"; gene_name "Zm00001d030110"; ref_gene_id "Zm00001d030110";
1	StringTie	transcript	106380446	106383615	1000	-	.	gene_id "MSTRG.2490"; transcript_id "Zm00001d030110_T016"; gene_name "Zm00001d030110"; ref_gene_id "Zm00001d030110";
1	StringTie	exon	106380446	106380729	1000	-	.	gene_id "MSTRG.2490"; transcript_id "Zm00001d030110_T016"; exon_number "1"; gene_name "Zm00001d030110"; ref_gene_id "Zm00001d030110";
1	StringTie	exon	106381021	106381027	1000	-	.	gene_id "MSTRG.2490"; transcript_id "Zm00001d030110_T016"; exon_number "2"; gene_name "Zm00001d030110"; ref_gene_id "Zm00001d030110";
1	StringTie	exon	106382219	106382309	1000	-	.	gene_id "MSTRG.2490"; transcript_id "Zm00001d030110_T016"; exon_number "3"; gene_name "Zm00001d030110"; ref_gene_id "Zm00001d030110";
1	StringTie	exon	106383244	106383615	1000	-	.	gene_id "MSTRG.2490"; transcript_id "Zm00001d030110_T016"; exon_number "4"; gene_name "Zm00001d030110"; ref_gene_id "Zm00001d030110";
1	StringTie	transcript	106382219	106383615	1000	-	.	gene_id "MSTRG.2490"; transcript_id "Zm00001d030110_T025"; gene_name "Zm00001d030110"; ref_gene_id "Zm00001d030110";
1	StringTie	exon	106382219	106382309	1000	-	.	gene_id "MSTRG.2490"; transcript_id "Zm00001d030110_T025"; exon_number "1"; gene_name "Zm00001d030110"; ref_gene_id "Zm00001d030110";
1	StringTie	exon	106383244	106383615	1000	-	.	gene_id "MSTRG.2490"; transcript_id "Zm00001d030110_T025"; exon_number "2"; gene_name "Zm00001d030110"; ref_gene_id "Zm00001d030110";
1	StringTie	transcript	107089906	107091836	1000	-	.	gene_id "MSTRG.2494"; transcript_id "Zm00001d030117_T009"; gene_name "Zm00001d030117"; ref_gene_id "Zm00001d030117";
1	StringTie	exon	107089906	107090040	1000	-	.	gene_id "MSTRG.2494"; transcript_id "Zm00001d030117_T009"; exon_number "1"; gene_name "Zm00001d030117"; ref_gene_id "Zm00001d030117";
1	StringTie	exon	107091613	107091726	1000	-	.	gene_id "MSTRG.2494"; transcript_id "Zm00001d030117_T009"; exon_number "2"; gene_name "Zm00001d030117"; ref_gene_id "Zm00001d030117";
1	StringTie	exon	107091819	107091836	1000	-	.	gene_id "MSTRG.2494"; transcript_id "Zm00001d030117_T009"; exon_number "3"; gene_name "Zm00001d030117"; ref_gene_id "Zm00001d030117";
1	StringTie	transcript	107089906	107092795	1000	-	.	gene_id "MSTRG.2494"; transcript_id "Zm00001d030117_T001"; gene_name "Zm00001d030117"; ref_gene_id "Zm00001d030117";
1	StringTie	exon	107089906	107090040	1000	-	.	gene_id "MSTRG.2494"; transcript_id "Zm00001d030117_T001"; exon_number "1"; gene_name "Zm00001d030117"; ref_gene_id "Zm00001d030117";
1	StringTie	exon	107091613	107091726	1000	-	.	gene_id "MSTRG.2494"; transcript_id "Zm00001d030117_T001"; exon_number "2"; gene_name "Zm00001d030117"; ref_gene_id "Zm00001d030117";
1	StringTie	exon	107091819	107091836	1000	-	.	gene_id "MSTRG.2494"; transcript_id "Zm00001d030117_T001"; exon_number "3"; gene_name "Zm00001d030117"; ref_gene_id "Zm00001d030117";
1	StringTie	exon	107092567	107092795	1000	-	.	gene_id "MSTRG.2494"; transcript_id "Zm00001d030117_T001"; exon_number "4"; gene_name "Zm00001d030117"; ref_gene_id "Zm00001d030117";
1	StringTie	transcript	107091598	107092186	1000	-	.	gene_id "MSTRG.2494"; transcript_id "Zm00001d030117_T008"; gene_name "Zm00001d030117"; ref_gene_id "Zm00001d030117";
1	StringTie	exon	107091598	107091726	1000	-	.	gene_id "MSTRG.2494"; transcript_id "Zm00001d030117_T008"; exon_number "1"; gene_name "Zm00001d030117"; ref_gene_id "Zm00001d030117";
1	StringTie	exon	107091819	107092186	1000	-	.	gene_id "MSTRG.2494"; transcript_id "Zm00001d030117_T008"; exon_number "2"; gene_name "Zm00001d030117"; ref_gene_id "Zm00001d030117";
1	StringTie	transcript	107092567	107092795	1000	-	.	gene_id "MSTRG.2494"; transcript_id "Zm00001d030117_T011"; gene_name "Zm00001d030117"; ref_gene_id "Zm00001d030117";
1	StringTie	exon	107092567	107092795	1000	-	.	gene_id "MSTRG.2494"; transcript_id "Zm00001d030117_T011"; exon_number "1"; gene_name "Zm00001d030117"; ref_gene_id "Zm00001d030117";
1	StringTie	transcript	107092567	107092857	1000	-	.	gene_id "MSTRG.2494"; transcript_id "Zm00001d030117_T004"; gene_name "Zm00001d030117"; ref_gene_id "Zm00001d030117";
1	StringTie	exon	107092567	107092696	1000	-	.	gene_id "MSTRG.2494"; transcript_id "Zm00001d030117_T004"; exon_number "1"; gene_name "Zm00001d030117"; ref_gene_id "Zm00001d030117";
1	StringTie	exon	107092796	107092857	1000	-	.	gene_id "MSTRG.2494"; transcript_id "Zm00001d030117_T004"; exon_number "2"; gene_name "Zm00001d030117"; ref_gene_id "Zm00001d030117";
1	StringTie	transcript	107682582	107685932	1000	-	.	gene_id "MSTRG.2499"; transcript_id "Zm00001d030126_T014"; gene_name "Zm00001d030126"; ref_gene_id "Zm00001d030126";
1	StringTie	exon	107682582	107682773	1000	-	.	gene_id "MSTRG.2499"; transcript_id "Zm00001d030126_T014"; exon_number "1"; gene_name "Zm00001d030126"; ref_gene_id "Zm00001d030126";
1	StringTie	exon	107684827	107684876	1000	-	.	gene_id "MSTRG.2499"; transcript_id "Zm00001d030126_T014"; exon_number "2"; gene_name "Zm00001d030126"; ref_gene_id "Zm00001d030126";
1	StringTie	exon	107685749	107685932	1000	-	.	gene_id "MSTRG.2499"; transcript_id "Zm00001d030126_T014"; exon_number "3"; gene_name "Zm00001d030126"; ref_gene_id "Zm00001d030126";
1	StringTie	transcript	107682582	107685932	1000	-	.	gene_id "MSTRG.2499"; transcript_id "Zm00001d030126_T011"; gene_name "Zm00001d030126"; ref_gene_id "Zm00001d030126";
1	StringTie	exon	107682582	107682773	1000	-	.	gene_id "MSTRG.2499"; transcript_id "Zm00001d030126_T011"; exon_number "1"; gene_name "Zm00001d030126"; ref_gene_id "Zm00001d030126";
1	StringTie	exon	107683274	107683382	1000	-	.	gene_id "MSTRG.2499"; transcript_id "Zm00001d030126_T011"; exon_number "2"; gene_name "Zm00001d030126"; ref_gene_id "Zm00001d030126";
1	StringTie	exon	107683458	107683612	1000	-	.	gene_id "MSTRG.2499"; transcript_id "Zm00001d030126_T011"; exon_number "3"; gene_name "Zm00001d030126"; ref_gene_id "Zm00001d030126";
1	StringTie	exon	107684827	107684876	1000	-	.	gene_id "MSTRG.2499"; transcript_id "Zm00001d030126_T011"; exon_number "4"; gene_name "Zm00001d030126"; ref_gene_id "Zm00001d030126";
1	StringTie	exon	107685749	107685932	1000	-	.	gene_id "MSTRG.2499"; transcript_id "Zm00001d030126_T011"; exon_number "5"; gene_name "Zm00001d030126"; ref_gene_id "Zm00001d030126";
1	StringTie	transcript	107684827	107685932	1000	-	.	gene_id "MSTRG.2499"; transcript_id "Zm00001d030126_T008"; gene_name "Zm00001d030126"; ref_gene_id "Zm00001d030126";
1	StringTie	exon	107684827	107684876	1000	-	.	gene_id "MSTRG.2499"; transcript_id "Zm00001d030126_T008"; exon_number "1"; gene_name "Zm00001d030126"; ref_gene_id "Zm00001d030126";
1	StringTie	exon	107685749	107685932	1000	-	.	gene_id "MSTRG.2499"; transcript_id "Zm00001d030126_T008"; exon_number "2"; gene_name "Zm00001d030126"; ref_gene_id "Zm00001d030126";
1	StringTie	transcript	107993970	107995223	1000	-	.	gene_id "MSTRG.2502"; transcript_id "Zm00001d030130_T001"; gene_name "Zm00001d030130"; ref_gene_id "Zm00001d030130";
1	StringTie	exon	107993970	107994120	1000	-	.	gene_id "MSTRG.2502"; transcript_id "Zm00001d030130_T001"; exon_number "1"; gene_name "Zm00001d030130"; ref_gene_id "Zm00001d030130";
1	StringTie	exon	107994219	107994274	1000	-	.	gene_id "MSTRG.2502"; transcript_id "Zm00001d030130_T001"; exon_number "2"; gene_name "Zm00001d030130"; ref_gene_id "Zm00001d030130";
1	StringTie	exon	107994827	107994963	1000	-	.	gene_id "MSTRG.2502"; transcript_id "Zm00001d030130_T001"; exon_number "3"; gene_name "Zm00001d030130"; ref_gene_id "Zm00001d030130";
1	StringTie	exon	107995143	107995223	1000	-	.	gene_id "MSTRG.2502"; transcript_id "Zm00001d030130_T001"; exon_number "4"; gene_name "Zm00001d030130"; ref_gene_id "Zm00001d030130";
1	StringTie	transcript	108194023	108194142	1000	-	.	gene_id "MSTRG.2503"; transcript_id "Zm00001d030131_T003"; gene_name "Zm00001d030131"; ref_gene_id "Zm00001d030131";
1	StringTie	exon	108194023	108194142	1000	-	.	gene_id "MSTRG.2503"; transcript_id "Zm00001d030131_T003"; exon_number "1"; gene_name "Zm00001d030131"; ref_gene_id "Zm00001d030131";
1	StringTie	transcript	108194023	108195509	1000	-	.	gene_id "MSTRG.2503"; transcript_id "Zm00001d030131_T005"; gene_name "Zm00001d030131"; ref_gene_id "Zm00001d030131";
1	StringTie	exon	108194023	108194142	1000	-	.	gene_id "MSTRG.2503"; transcript_id "Zm00001d030131_T005"; exon_number "1"; gene_name "Zm00001d030131"; ref_gene_id "Zm00001d030131";
1	StringTie	exon	108194940	108195065	1000	-	.	gene_id "MSTRG.2503"; transcript_id "Zm00001d030131_T005"; exon_number "2"; gene_name "Zm00001d030131"; ref_gene_id "Zm00001d030131";
1	StringTie	exon	108195198	108195266	1000	-	.	gene_id "MSTRG.2503"; transcript_id "Zm00001d030131_T005"; exon_number "3"; gene_name "Zm00001d030131"; ref_gene_id "Zm00001d030131";
1	StringTie	exon	108195354	108195509	1000	-	.	gene_id "MSTRG.2503"; transcript_id "Zm00001d030131_T005"; exon_number "4"; gene_name "Zm00001d030131"; ref_gene_id "Zm00001d030131";
1	StringTie	transcript	108194940	108195509	1000	-	.	gene_id "MSTRG.2503"; transcript_id "Zm00001d030131_T007"; gene_name "Zm00001d030131"; ref_gene_id "Zm00001d030131";
1	StringTie	exon	108194940	108195065	1000	-	.	gene_id "MSTRG.2503"; transcript_id "Zm00001d030131_T007"; exon_number "1"; gene_name "Zm00001d030131"; ref_gene_id "Zm00001d030131";
1	StringTie	exon	108195198	108195266	1000	-	.	gene_id "MSTRG.2503"; transcript_id "Zm00001d030131_T007"; exon_number "2"; gene_name "Zm00001d030131"; ref_gene_id "Zm00001d030131";
1	StringTie	exon	108195354	108195509	1000	-	.	gene_id "MSTRG.2503"; transcript_id "Zm00001d030131_T007"; exon_number "3"; gene_name "Zm00001d030131"; ref_gene_id "Zm00001d030131";
1	StringTie	transcript	108286049	108286220	1000	-	.	gene_id "MSTRG.2505"; transcript_id "Zm00001d030133_T005"; gene_name "Zm00001d030133"; ref_gene_id "Zm00001d030133";
1	StringTie	exon	108286049	108286220	1000	-	.	gene_id "MSTRG.2505"; transcript_id "Zm00001d030133_T005"; exon_number "1"; gene_name "Zm00001d030133"; ref_gene_id "Zm00001d030133";
1	StringTie	transcript	108664006	108666094	1000	-	.	gene_id "MSTRG.2512"; transcript_id "Zm00001d030146_T002"; gene_name "Zm00001d030146"; ref_gene_id "Zm00001d030146";
1	StringTie	exon	108664006	108664095	1000	-	.	gene_id "MSTRG.2512"; transcript_id "Zm00001d030146_T002"; exon_number "1"; gene_name "Zm00001d030146"; ref_gene_id "Zm00001d030146";
1	StringTie	exon	108665836	108666094	1000	-	.	gene_id "MSTRG.2512"; transcript_id "Zm00001d030146_T002"; exon_number "2"; gene_name "Zm00001d030146"; ref_gene_id "Zm00001d030146";
1	StringTie	transcript	108664006	108666094	1000	-	.	gene_id "MSTRG.2512"; transcript_id "Zm00001d030146_T004"; gene_name "Zm00001d030146"; ref_gene_id "Zm00001d030146";
1	StringTie	exon	108664006	108664095	1000	-	.	gene_id "MSTRG.2512"; transcript_id "Zm00001d030146_T004"; exon_number "1"; gene_name "Zm00001d030146"; ref_gene_id "Zm00001d030146";
1	StringTie	exon	108665482	108665562	1000	-	.	gene_id "MSTRG.2512"; transcript_id "Zm00001d030146_T004"; exon_number "2"; gene_name "Zm00001d030146"; ref_gene_id "Zm00001d030146";
1	StringTie	exon	108665806	108666094	1000	-	.	gene_id "MSTRG.2512"; transcript_id "Zm00001d030146_T004"; exon_number "3"; gene_name "Zm00001d030146"; ref_gene_id "Zm00001d030146";
1	StringTie	transcript	108665431	108665562	1000	-	.	gene_id "MSTRG.2512"; transcript_id "Zm00001d030146_T005"; gene_name "Zm00001d030146"; ref_gene_id "Zm00001d030146";
1	StringTie	exon	108665431	108665562	1000	-	.	gene_id "MSTRG.2512"; transcript_id "Zm00001d030146_T005"; exon_number "1"; gene_name "Zm00001d030146"; ref_gene_id "Zm00001d030146";
1	StringTie	transcript	109420978	109421962	1000	-	.	gene_id "MSTRG.2524"; transcript_id "Zm00001d030158_T001"; gene_name "Zm00001d030158"; ref_gene_id "Zm00001d030158";
1	StringTie	exon	109420978	109421962	1000	-	.	gene_id "MSTRG.2524"; transcript_id "Zm00001d030158_T001"; exon_number "1"; gene_name "Zm00001d030158"; ref_gene_id "Zm00001d030158";
1	StringTie	transcript	109861151	109870103	1000	+	.	gene_id "MSTRG.2529"; transcript_id "Zm00001d030164_T044"; gene_name "Zm00001d030164"; ref_gene_id "Zm00001d030164";
1	StringTie	exon	109861151	109861228	1000	+	.	gene_id "MSTRG.2529"; transcript_id "Zm00001d030164_T044"; exon_number "1"; gene_name "Zm00001d030164"; ref_gene_id "Zm00001d030164";
1	StringTie	exon	109861372	109861446	1000	+	.	gene_id "MSTRG.2529"; transcript_id "Zm00001d030164_T044"; exon_number "2"; gene_name "Zm00001d030164"; ref_gene_id "Zm00001d030164";
1	StringTie	exon	109861538	109861603	1000	+	.	gene_id "MSTRG.2529"; transcript_id "Zm00001d030164_T044"; exon_number "3"; gene_name "Zm00001d030164"; ref_gene_id "Zm00001d030164";
1	StringTie	exon	109869793	109870103	1000	+	.	gene_id "MSTRG.2529"; transcript_id "Zm00001d030164_T044"; exon_number "4"; gene_name "Zm00001d030164"; ref_gene_id "Zm00001d030164";
1	StringTie	transcript	109861151	109862387	1000	+	.	gene_id "MSTRG.2529"; transcript_id "Zm00001d030164_T083"; gene_name "Zm00001d030164"; ref_gene_id "Zm00001d030164";
1	StringTie	exon	109861151	109861228	1000	+	.	gene_id "MSTRG.2529"; transcript_id "Zm00001d030164_T083"; exon_number "1"; gene_name "Zm00001d030164"; ref_gene_id "Zm00001d030164";
1	StringTie	exon	109861372	109861446	1000	+	.	gene_id "MSTRG.2529"; transcript_id "Zm00001d030164_T083"; exon_number "2"; gene_name "Zm00001d030164"; ref_gene_id "Zm00001d030164";
1	StringTie	exon	109861538	109861585	1000	+	.	gene_id "MSTRG.2529"; transcript_id "Zm00001d030164_T083"; exon_number "3"; gene_name "Zm00001d030164"; ref_gene_id "Zm00001d030164";
1	StringTie	exon	109861988	109862028	1000	+	.	gene_id "MSTRG.2529"; transcript_id "Zm00001d030164_T083"; exon_number "4"; gene_name "Zm00001d030164"; ref_gene_id "Zm00001d030164";
1	StringTie	exon	109862158	109862387	1000	+	.	gene_id "MSTRG.2529"; transcript_id "Zm00001d030164_T083"; exon_number "5"; gene_name "Zm00001d030164"; ref_gene_id "Zm00001d030164";
1	StringTie	transcript	109862164	109864703	1000	+	.	gene_id "MSTRG.2529"; transcript_id "Zm00001d030164_T017"; gene_name "Zm00001d030164"; ref_gene_id "Zm00001d030164";
1	StringTie	exon	109862164	109862387	1000	+	.	gene_id "MSTRG.2529"; transcript_id "Zm00001d030164_T017"; exon_number "1"; gene_name "Zm00001d030164"; ref_gene_id "Zm00001d030164";
1	StringTie	exon	109864323	109864703	1000	+	.	gene_id "MSTRG.2529"; transcript_id "Zm00001d030164_T017"; exon_number "2"; gene_name "Zm00001d030164"; ref_gene_id "Zm00001d030164";
1	StringTie	transcript	109869793	109870103	1000	+	.	gene_id "MSTRG.2529"; transcript_id "Zm00001d030164_T071"; gene_name "Zm00001d030164"; ref_gene_id "Zm00001d030164";
1	StringTie	exon	109869793	109870103	1000	+	.	gene_id "MSTRG.2529"; transcript_id "Zm00001d030164_T071"; exon_number "1"; gene_name "Zm00001d030164"; ref_gene_id "Zm00001d030164";
1	StringTie	transcript	110005778	110006099	1000	-	.	gene_id "MSTRG.2531"; transcript_id "Zm00001d030166_T019"; gene_name "Zm00001d030166"; ref_gene_id "Zm00001d030166";
1	StringTie	exon	110005778	110005867	1000	-	.	gene_id "MSTRG.2531"; transcript_id "Zm00001d030166_T019"; exon_number "1"; gene_name "Zm00001d030166"; ref_gene_id "Zm00001d030166";
1	StringTie	exon	110005965	110006099	1000	-	.	gene_id "MSTRG.2531"; transcript_id "Zm00001d030166_T019"; exon_number "2"; gene_name "Zm00001d030166"; ref_gene_id "Zm00001d030166";
1	StringTie	transcript	110383501	110384445	1000	-	.	gene_id "MSTRG.2537"; transcript_id "Zm00001d030173_T024"; gene_name "Zm00001d030173"; ref_gene_id "Zm00001d030173";
1	StringTie	exon	110383501	110383619	1000	-	.	gene_id "MSTRG.2537"; transcript_id "Zm00001d030173_T024"; exon_number "1"; gene_name "Zm00001d030173"; ref_gene_id "Zm00001d030173";
1	StringTie	exon	110383695	110383704	1000	-	.	gene_id "MSTRG.2537"; transcript_id "Zm00001d030173_T024"; exon_number "2"; gene_name "Zm00001d030173"; ref_gene_id "Zm00001d030173";
1	StringTie	exon	110384174	110384445	1000	-	.	gene_id "MSTRG.2537"; transcript_id "Zm00001d030173_T024"; exon_number "3"; gene_name "Zm00001d030173"; ref_gene_id "Zm00001d030173";
1	StringTie	transcript	110384174	110384445	1000	-	.	gene_id "MSTRG.2537"; transcript_id "Zm00001d030173_T017"; gene_name "Zm00001d030173"; ref_gene_id "Zm00001d030173";
1	StringTie	exon	110384174	110384445	1000	-	.	gene_id "MSTRG.2537"; transcript_id "Zm00001d030173_T017"; exon_number "1"; gene_name "Zm00001d030173"; ref_gene_id "Zm00001d030173";
1	StringTie	transcript	115181126	115181389	1000	-	.	gene_id "MSTRG.2578"; transcript_id "Zm00001d030235_T003"; gene_name "Zm00001d030235"; ref_gene_id "Zm00001d030235";
1	StringTie	exon	115181126	115181389	1000	-	.	gene_id "MSTRG.2578"; transcript_id "Zm00001d030235_T003"; exon_number "1"; gene_name "Zm00001d030235"; ref_gene_id "Zm00001d030235";
1	StringTie	transcript	115181126	115183345	1000	-	.	gene_id "MSTRG.2578"; transcript_id "Zm00001d030235_T001"; gene_name "Zm00001d030235"; ref_gene_id "Zm00001d030235";
1	StringTie	exon	115181126	115181389	1000	-	.	gene_id "MSTRG.2578"; transcript_id "Zm00001d030235_T001"; exon_number "1"; gene_name "Zm00001d030235"; ref_gene_id "Zm00001d030235";
1	StringTie	exon	115183252	115183345	1000	-	.	gene_id "MSTRG.2578"; transcript_id "Zm00001d030235_T001"; exon_number "2"; gene_name "Zm00001d030235"; ref_gene_id "Zm00001d030235";
1	StringTie	transcript	115456362	115456659	1000	-	.	gene_id "MSTRG.2580"; transcript_id "Zm00001d030239_T041"; gene_name "Zm00001d030239"; ref_gene_id "Zm00001d030239";
1	StringTie	exon	115456362	115456659	1000	-	.	gene_id "MSTRG.2580"; transcript_id "Zm00001d030239_T041"; exon_number "1"; gene_name "Zm00001d030239"; ref_gene_id "Zm00001d030239";
1	StringTie	transcript	117002736	117003430	1000	+	.	gene_id "MSTRG.2594"; transcript_id "Zm00001d030256_T007"; gene_name "Zm00001d030256"; ref_gene_id "Zm00001d030256";
1	StringTie	exon	117002736	117003430	1000	+	.	gene_id "MSTRG.2594"; transcript_id "Zm00001d030256_T007"; exon_number "1"; gene_name "Zm00001d030256"; ref_gene_id "Zm00001d030256";
1	StringTie	transcript	117649921	117686883	1000	+	.	gene_id "MSTRG.2600"; transcript_id "Zm00001d030266_T072"; gene_name "Zm00001d030266"; ref_gene_id "Zm00001d030266";
1	StringTie	exon	117649921	117650013	1000	+	.	gene_id "MSTRG.2600"; transcript_id "Zm00001d030266_T072"; exon_number "1"; gene_name "Zm00001d030266"; ref_gene_id "Zm00001d030266";
1	StringTie	exon	117650101	117650163	1000	+	.	gene_id "MSTRG.2600"; transcript_id "Zm00001d030266_T072"; exon_number "2"; gene_name "Zm00001d030266"; ref_gene_id "Zm00001d030266";
1	StringTie	exon	117650721	117650771	1000	+	.	gene_id "MSTRG.2600"; transcript_id "Zm00001d030266_T072"; exon_number "3"; gene_name "Zm00001d030266"; ref_gene_id "Zm00001d030266";
1	StringTie	exon	117650865	117650962	1000	+	.	gene_id "MSTRG.2600"; transcript_id "Zm00001d030266_T072"; exon_number "4"; gene_name "Zm00001d030266"; ref_gene_id "Zm00001d030266";
1	StringTie	exon	117651098	117651136	1000	+	.	gene_id "MSTRG.2600"; transcript_id "Zm00001d030266_T072"; exon_number "5"; gene_name "Zm00001d030266"; ref_gene_id "Zm00001d030266";
1	StringTie	exon	117651233	117651321	1000	+	.	gene_id "MSTRG.2600"; transcript_id "Zm00001d030266_T072"; exon_number "6"; gene_name "Zm00001d030266"; ref_gene_id "Zm00001d030266";
1	StringTie	exon	117651444	117651513	1000	+	.	gene_id "MSTRG.2600"; transcript_id "Zm00001d030266_T072"; exon_number "7"; gene_name "Zm00001d030266"; ref_gene_id "Zm00001d030266";
1	StringTie	exon	117651670	117651704	1000	+	.	gene_id "MSTRG.2600"; transcript_id "Zm00001d030266_T072"; exon_number "8"; gene_name "Zm00001d030266"; ref_gene_id "Zm00001d030266";
[truncated: 29,640 more rows]
